# Supplementary material for: Transcriptomic and evolutionary analysis of the mechanisms by which P. argentatum, a rubber producing perennial, responds to drought
Source: BMC Plant Biol. 2019 Nov 13;19:494. doi: 10.1186/s12870-019-2106-2 (PMC6854645; doi:10.1186/s12870-019-2106-2)
Supplement: Supplementary file 5 — Additional file 5: Table S3. Complete list of GO results for differentially expressed transcripts. [file 12870_2019_2106_MOESM5_ESM.xlsx]

## Sheet: BLAST2GO_downregulated
Supplemental Table 3. BLAST2GO outputs for Guayule transcripts that were either up or down-regulated by low water conditions.
Tags	SeqName	Description	Length	#Hits	e-Value	sim mean	#GO	GO IDs	GO Names	Enzyme Codes	Enzyme Names	InterPro IDs	InterPro GO IDs	InterPro GO Names
[INTERPRO, BLASTED, ANNOTATED]	GFTW01006348.1	AT5G43060.1	557	20	3.68197e-84	76.68	2	P:GO:0006508; F:GO:0008234	P:proteolysis; F:cysteine-type peptidase activity			IPR000668 (SMART); G3DSA:3.90.70.10 (GENE3D); IPR000668 (PFAM); PTHR12411 (PANTHER); PTHR12411:SF523 (PANTHER); IPR039417 (CDD); IPR038765 (SUPERFAMILY)	P:GO:0006508; F:GO:0008234	P:proteolysis; F:cysteine-type peptidase activity
[INTERPRO, BLASTED, ANNOTATED]	GFTW01006373.1	AT1G65980.1	846	8	9.91985e-93	80.14	2	F:GO:0016491; P:GO:0045454	F:oxidoreductase activity; P:cell redox homeostasis			IPR013740 (PFAM); G3DSA:3.40.30.10 (GENE3D); PTHR10430:SF8 (PANTHER); IPR037944 (PANTHER); IPR013766 (PROSITE_PROFILES); IPR037944 (CDD); IPR036249 (SUPERFAMILY)	F:GO:0016491; P:GO:0045454	F:oxidoreductase activity; P:cell redox homeostasis
[INTERPRO, BLASTED, ANNOTATED]	GFTW01006599.1	AT4G37260.1	550	20	1.24569e-70	78.72	1	F:GO:0003677	F:DNA binding			IPR001005 (SMART); G3DSA:1.10.10.60 (GENE3D); IPR001005 (PFAM); G3DSA:1.10.10.60 (GENE3D); IPR015495 (PANTHER); PTHR45614:SF47 (PANTHER); IPR017930 (PROSITE_PROFILES); IPR017930 (PROSITE_PROFILES); IPR001005 (CDD); IPR001005 (CDD); IPR009057 (SUPERFAMILY)	F:GO:0003677	F:DNA binding
[INTERPRO, BLASTED]	GFTW01006906.1	AT5G60500.1	340	3	1.11004e-10	74.03						no IPS match	no IPS match	no IPS match
[INTERPRO, BLASTED, ANNOTATED]	GFTW01007757.1	AT1G47128.1	400	20	2.55141e-61	77.15	2	P:GO:0006508; F:GO:0008234	P:proteolysis; F:cysteine-type peptidase activity			IPR000118 (SMART); IPR000668 (PFAM); IPR000118 (PFAM); IPR037277 (G3DSA:3.10.20.GENE3D); G3DSA:3.90.70.10 (GENE3D); PTHR12411:SF680 (PANTHER); PTHR12411 (PANTHER); IPR038765 (SUPERFAMILY); SSF57277 (SUPERFAMILY)	P:GO:0006508; F:GO:0008234	P:proteolysis; F:cysteine-type peptidase activity
[INTERPRO, BLASTED, ANNOTATED]	GFTW01008416.1	AT3G11510.1	236	3	1.36543e-17	96.43	4	F:GO:0003735; C:GO:0005840; P:GO:0006412; P:GO:0042254	F:structural constituent of ribosome; C:ribosome; P:translation; P:ribosome biogenesis			IPR036967 (G3DSA:3.30.420.GENE3D); IPR001971 (PFAM); mobidb-lite (MOBIDB_LITE); PTHR11759:SF23 (PANTHER); IPR001971 (PANTHER)	F:GO:0003735; C:GO:0005840; P:GO:0006412	F:structural constituent of ribosome; C:ribosome; P:translation
[INTERPRO, NO-BLAST]	GFTW01009072.1	---NA---	421									no IPS match	no IPS match	no IPS match
[INTERPRO, BLASTED, ANNOTATED]	GFTW01010134.1	AT2G29630.4	468	4	4.91987e-98	94.16	2	P:GO:0009228; F:GO:0051536	P:thiamine biosynthetic process; F:iron-sulfur cluster binding			IPR002817 (PFAM); IPR002817 (PANTHER)	P:GO:0009228; F:GO:0051536	P:thiamine biosynthetic process; F:iron-sulfur cluster binding
[INTERPRO, BLASTED]	GFTW01011372.1	AT4G28290.2	460	3	1.90932e-06	98.25						PTHR34683 (PANTHER); PTHR34683:SF2 (PANTHER)	no GO terms	no GO terms
[INTERPRO, NO-BLAST]	GFTW01012040.1	---NA---	299									no IPS match	no IPS match	no IPS match
[INTERPRO, BLASTED, ANNOTATED]	GFTW01012502.1	AT5G16440.1	451	3	3.21914e-65	82.41	4	F:GO:0004452; P:GO:0006694; P:GO:0016114; F:GO:0016787	F:isopentenyl-diphosphate delta-isomerase activity; P:steroid biosynthetic process; P:terpenoid biosynthetic process; F:hydrolase activity			IPR011876 (TIGRFAM); IPR000086 (PFAM); G3DSA:3.90.79.10 (GENE3D); PTHR10885:SF6 (PANTHER); PTHR10885 (PANTHER); IPR000086 (PROSITE_PROFILES); IPR015797 (SUPERFAMILY)	F:GO:0004452; P:GO:0008299; F:GO:0016787	F:isopentenyl-diphosphate delta-isomerase activity; P:isoprenoid biosynthetic process; F:hydrolase activity
[INTERPRO, BLASTED, ANNOTATED]	GFTW01012851.1	AT2G25940.1	438	4	9.19354e-51	70.73	2	P:GO:0006508; F:GO:0008233	P:proteolysis; F:peptidase activity			IPR001096 (PFAM); G3DSA:3.40.50.1460 (GENE3D); IPR001096 (PANTHER); PTHR12000:SF31 (PANTHER)	P:GO:0006508; F:GO:0008233	P:proteolysis; F:peptidase activity
[INTERPRO, BLASTED, ANNOTATED]	GFTW01012991.1	AT5G20020.1	548	4	3.95308e-10	98.08	3	F:GO:0003924; F:GO:0005525; P:GO:0006913	F:GTPase activity; F:GTP binding; P:nucleocytoplasmic transport			IPR002041 (PANTHER); PTHR24071:SF19 (PANTHER)	F:GO:0003924; F:GO:0005525; P:GO:0006913	F:GTPase activity; F:GTP binding; P:nucleocytoplasmic transport
[INTERPRO, BLASTED]	GFTW01013056.1	AT2G07050.2	231	20	2.00384e-14	87.07						no IPS match	no IPS match	CAS1, CYCLOARTENOL SYNTHASE 1; Involved in the biosynthesis of brassinosteroids. Catalyzes the reaction from epoxysqualene to cycloartenol.
[INTERPRO, BLASTED, ANNOTATED]	GFTW01013528.1	AT5G18840.1	277	20	3.25829e-12	80.81	3	C:GO:0016021; F:GO:0022857; P:GO:0055085	C:integral component of membrane; F:transmembrane transporter activity; P:transmembrane transport			G3DSA:1.20.1250.20 (GENE3D); IPR005828 (PFAM)	C:GO:0016021; F:GO:0022857; P:GO:0055085	C:integral component of membrane; F:transmembrane transporter activity; P:transmembrane transport
[INTERPRO, BLASTED]	GFTW01013923.1	AT1G04290.1	248	2	1.01688e-11	66.67						no IPS match	no IPS match	Thioesterase
[INTERPRO, BLASTED, ANNOTATED]	GFTW01014556.1	AT5G08420.1	264	1	1.67059e-17	85.71	1	F:GO:0003723	F:RNA binding			IPR036612 (G3DSA:3.30.1370.GENE3D); IPR024166 (PANTHER); IPR036612 (SUPERFAMILY)	F:GO:0003723	F:RNA binding
[INTERPRO, BLASTED, ANNOTATED]	GFTW01015108.1	AT4G14305.1	831	5	8.52275e-77	77.12	1	C:GO:0016021	C:integral component of membrane			IPR007248 (PFAM); PTHR11266:SF86 (PANTHER); IPR007248 (PANTHER)	C:GO:0016021	C:integral component of membrane
[INTERPRO, NO-BLAST]	GFTW01015629.1	---NA---	254									no IPS match	no IPS match	no IPS match
[INTERPRO, BLASTED, ANNOTATED]	GFTW01015832.1	AT3G06320.1	600	2	1.6966e-23	84.48	4	F:GO:0003735; C:GO:0005840; P:GO:0006412; P:GO:0042254	F:structural constituent of ribosome; C:ribosome; P:translation; P:ribosome biogenesis			IPR038584 (G3DSA:2.20.28.GENE3D); IPR001705 (PFAM); IPR001705 (TIGRFAM); PTHR15238 (PANTHER); IPR001705 (HAMAP); IPR011332 (SUPERFAMILY)	F:GO:0003735; C:GO:0005840; P:GO:0006412	F:structural constituent of ribosome; C:ribosome; P:translation
[INTERPRO, NO-BLAST]	GFTW01015932.1	---NA---	839									no IPS match	no IPS match	no IPS match
[INTERPRO, BLASTED]	GFTW01016131.1	AT2G07050.2	241	20	3.04529e-20	92.75						G3DSA:1.50.10.20 (GENE3D); PTHR11764 (PANTHER); PTHR11764:SF20 (PANTHER); IPR008930 (SUPERFAMILY)	no GO terms	no GO terms
[INTERPRO, BLASTED]	GFTW01016510.1	AT2G26530.2	1231	4	5.7597e-25	55.82						IPR012442 (PFAM); mobidb-lite (MOBIDB_LITE); mobidb-lite (MOBIDB_LITE); mobidb-lite (MOBIDB_LITE); mobidb-lite (MOBIDB_LITE); mobidb-lite (MOBIDB_LITE); PTHR33095:SF43 (PANTHER); PTHR33095 (PANTHER)	no GO terms	no GO terms
[INTERPRO, NO-BLAST]	GFTW01017402.1	---NA---	657									PS51257 (PROSITE_PROFILES)	no GO terms	no GO terms
[INTERPRO, BLASTED, ANNOTATED]	GFTW01017432.1	AT1G65980.1	977	6	9.76366e-49	78.54	1	F:GO:0016491	F:oxidoreductase activity			IPR013740 (PFAM); G3DSA:3.40.30.10 (GENE3D); IPR037944 (PANTHER); PTHR10430:SF8 (PANTHER); IPR036249 (SUPERFAMILY)	F:GO:0016491	F:oxidoreductase activity
[INTERPRO, BLASTED, ANNOTATED]	GFTW01018046.1	AT5G67590.1	776	1	2.13699e-62	79.47	2	F:GO:0016651; P:GO:0022900	F:oxidoreductase activity, acting on NAD(P)H; P:electron transport chain			IPR038532 (G3DSA:3.30.160.GENE3D); IPR006885 (PFAM); IPR006885 (PANTHER); PTHR12219:SF23 (PANTHER)	F:GO:0016651; P:GO:0022900	F:oxidoreductase activity, acting on NAD(P)H; P:electron transport chain
[INTERPRO, BLASTED]	GFTW01018305.1	AT4G34350.1	350	1	3.97369e-15	69.49						no IPS match	no IPS match	no IPS match
[INTERPRO, BLASTED]	GFTW01019159.1	AT3G11170.1	742	5	4.15372e-09	89.33						no IPS match	no IPS match	no IPS match
[INTERPRO, BLASTED, ANNOTATED]	GFTW01019165.1	AT5G59140.1	307	1	4.63817e-39	90.41	1	P:GO:0006511	P:ubiquitin-dependent protein catabolic process			IPR001232 (SMART); G3DSA:3.30.710.10 (GENE3D); IPR016073 (PFAM); IPR039948 (PANTHER); PTHR20648:SF0 (PANTHER); IPR011333 (SUPERFAMILY)	P:GO:0006511	P:ubiquitin-dependent protein catabolic process
[INTERPRO, BLASTED]	GFTW01019328.1	AT4G09320.1	242	5	6.57594e-15	76.12						IPR034907 (PFAM); IPR036850 (G3DSA:3.30.70.GENE3D); IPR036850 (SUPERFAMILY)	no GO terms	no GO terms
[INTERPRO, NO-BLAST]	GFTW01019727.1	---NA---	814									mobidb-lite (MOBIDB_LITE)	no GO terms	no GO terms
[INTERPRO, NO-BLAST]	GFTW01020659.1	---NA---	440									PTHR38223 (PANTHER)	no GO terms	no GO terms
[INTERPRO, NO-BLAST]	GFTW01020712.1	---NA---	299									no IPS match	no IPS match	no IPS match
[INTERPRO, NO-BLAST]	GFTW01021705.1	---NA---	415									no IPS match	no IPS match	no IPS match
[INTERPRO, BLASTED]	GFTW01022991.1	AT1G73990.1	281	2	7.65466e-45	84.95						G3DSA:3.90.226.10 (GENE3D); PTHR33209 (PANTHER); IPR029045 (SUPERFAMILY)	no GO terms	no GO terms
[INTERPRO, NO-BLAST]	GFTW01025980.1	---NA---	718									mobidb-lite (MOBIDB_LITE)	no GO terms	no GO terms
[INTERPRO, NO-BLAST]	GFTW01026016.1	---NA---	430									no IPS match	no IPS match	no IPS match
[INTERPRO, BLASTED]	GFTW01026547.1	AT2G20820.1	516	2	8.11004e-29	70.26						PTHR35292 (PANTHER); PTHR35292:SF5 (PANTHER)	no GO terms	no GO terms
[INTERPRO, NO-BLAST]	GFTW01026577.1	---NA---	359									no IPS match	no IPS match	no IPS match
[INTERPRO, NO-BLAST]	GFTW01026611.1	---NA---	244									no IPS match	no IPS match	no IPS match
[INTERPRO, NO-BLAST]	GFTW01026853.1	---NA---	351									IPR024489 (PFAM); PTHR33731 (PANTHER); PTHR33731:SF11 (PANTHER); IPR024489 (PRODOM)	no GO terms	no GO terms
[INTERPRO, NO-BLAST]	GFTW01026854.1	---NA---	359									no IPS match	no IPS match	no IPS match
[INTERPRO, BLASTED]	GFTW01027094.1	AT1G47128.1	445	20	3.85814e-29	71.3						IPR013201 (SMART); G3DSA:3.90.70.10 (GENE3D); IPR013201 (PFAM); PTHR12411 (PANTHER); PTHR12411:SF523 (PANTHER); IPR038765 (SUPERFAMILY)	no GO terms	no GO terms
[INTERPRO, BLASTED, ANNOTATED]	GFTW01027388.1	AT1G61810.2	408	20	1.94194e-54	71.52	2	F:GO:0004553; P:GO:0005975	F:hydrolase activity, hydrolyzing O-glycosyl compounds; P:carbohydrate metabolic process			IPR001360 (PFAM); G3DSA:3.20.20.80 (GENE3D); IPR001360 (PANTHER); PTHR10353:SF175 (PANTHER); IPR017853 (SUPERFAMILY)	F:GO:0004553; P:GO:0005975	F:hydrolase activity, hydrolyzing O-glycosyl compounds; P:carbohydrate metabolic process
[INTERPRO, BLASTED]	GFTW01027858.1	AT4G21105.3	600	3	6.05618e-33	90.15						IPR039297 (PFAM); PTHR35308:SF9 (PANTHER); IPR039296 (PANTHER)	no GO terms	no GO terms
[INTERPRO, NO-BLAST]	GFTW01028673.1	---NA---	500									PTHR38223 (PANTHER)	no GO terms	no GO terms
[INTERPRO, BLASTED, ANNOTATED]	GFTW01028919.1	AT4G16740.4	568	20	4.52081e-24	54.79	1	F:GO:0010333	F:terpene synthase activity			IPR001906 (PFAM); IPR036965 (G3DSA:1.50.10.GENE3D); PTHR31225:SF9 (PANTHER); PTHR31225 (PANTHER); IPR008930 (SUPERFAMILY)	F:GO:0010333; F:GO:0016829	F:terpene synthase activity; F:lyase activity
[INTERPRO, BLASTED]	GFTW01029323.1	AT5G59720.1	376	6	4.81796e-19	72.51						IPR008978 (G3DSA:2.60.40.GENE3D); IPR031107 (PANTHER); PTHR11527:SF303 (PANTHER)	no GO terms	no GO terms
[INTERPRO, BLASTED, ANNOTATED]	GFTW01029615.1	AT4G37850.2	1078	20	1.0661e-33	58.91	1	F:GO:0046983	F:protein dimerization activity			IPR011598 (SMART); IPR036638 (G3DSA:4.10.280.GENE3D); IPR011598 (PFAM); PTHR45959 (PANTHER); PTHR45959:SF2 (PANTHER); IPR011598 (PROSITE_PROFILES); IPR011598 (CDD); IPR036638 (SUPERFAMILY)	F:GO:0046983	F:protein dimerization activity
[INTERPRO, BLASTED, ANNOTATED]	GFTW01029687.1	AT5G55630.2	1720	8	1.47664e-81	60.45	5	C:GO:0005887; C:GO:0009705; F:GO:0022841; P:GO:0030007; P:GO:0071805	C:integral component of plasma membrane; C:plant-type vacuole membrane; F:potassium ion leak channel activity; P:cellular potassium ion homeostasis; P:potassium ion transmembrane transport			G3DSA:1.10.287.70 (GENE3D); IPR013099 (PFAM); G3DSA:1.10.287.70 (GENE3D); G3DSA:1.10.238.10 (GENE3D); IPR031144 (PTHR11003:PANTHER); PTHR11003 (PANTHER); SSF81324 (SUPERFAMILY); IPR011992 (SUPERFAMILY); SSF81324 (SUPERFAMILY)	C:GO:0005887; C:GO:0009705; F:GO:0022841; P:GO:0030007; P:GO:0071805	C:integral component of plasma membrane; C:plant-type vacuole membrane; F:potassium ion leak channel activity; P:cellular potassium ion homeostasis; P:potassium ion transmembrane transport
[INTERPRO, BLASTED, ANNOTATED]	GFTW01029757.1	AT2G03200.1	1755	20	9.10588e-54	44.68	2	F:GO:0004190; P:GO:0006508	F:aspartic-type endopeptidase activity; P:proteolysis			IPR001461 (PRINTS); IPR032861 (PFAM); IPR032799 (PFAM); IPR021109 (G3DSA:2.40.70.GENE3D); IPR021109 (G3DSA:2.40.70.GENE3D); IPR001461 (PANTHER); PTHR13683:SF777 (PANTHER); IPR033121 (PROSITE_PROFILES); IPR034161 (CDD); IPR021109 (SUPERFAMILY)	F:GO:0004190; P:GO:0006508	F:aspartic-type endopeptidase activity; P:proteolysis
[INTERPRO, BLASTED, ANNOTATED]	GFTW01029985.1	AT5G55190.1	426	4	9.53373e-11	98.08	3	F:GO:0003924; F:GO:0005525; P:GO:0006913	F:GTPase activity; F:GTP binding; P:nucleocytoplasmic transport			IPR002041 (PANTHER); PTHR24071:SF19 (PANTHER)	F:GO:0003924; F:GO:0005525; P:GO:0006913	F:GTPase activity; F:GTP binding; P:nucleocytoplasmic transport
[INTERPRO, NO-BLAST]	GFTW01031553.1	---NA---	436									no IPS match	no IPS match	no IPS match
[INTERPRO, NO-BLAST]	GFTW01032792.1	---NA---	688									PTHR33641 (PANTHER)	no GO terms	no GO terms
[INTERPRO, NO-BLAST, ANNOTATED]	GFTW01033027.1	---NA---	1068				4	F:GO:0003700; C:GO:0005667; P:GO:0006355; P:GO:0006355	F:DNA-binding transcription factor activity; C:transcription factor complex; P:regulation of transcription, DNA-templated; P:regulation of transcription, DNA-templated			IPR004827 (SMART); G3DSA:1.20.5.170 (GENE3D); IPR004827 (PFAM); mobidb-lite (MOBIDB_LITE); mobidb-lite (MOBIDB_LITE); mobidb-lite (MOBIDB_LITE); mobidb-lite (MOBIDB_LITE); mobidb-lite (MOBIDB_LITE); PTHR22952:SF402 (PANTHER); PTHR22952 (PANTHER); IPR004827 (PROSITE_PROFILES); cd14707 (CDD); SSF57959 (SUPERFAMILY)	F:GO:0003700; P:GO:0006355	F:DNA-binding transcription factor activity; P:regulation of transcription, DNA-templated
[INTERPRO, BLASTED]	GFTW01034308.1	AT4G37300.1	293	1	7.4616e-05	79.17						PTHR34686 (PANTHER)	no GO terms	no GO terms
[INTERPRO, BLASTED]	GFTW01035267.1	AT1G47128.1	413	4	8.3721e-32	71.7						no IPS match	no IPS match	RD21, RD21A, RESPONSIVE TO DEHYDRATION 21, RESPONSIVE TO DEHYDRATION 21A; cysteine proteinase precursor-like protein/ dehydration stress-responsive gene (RD21). Has been shown to have peptide ligase activity and protease activity in vitro. RD21 is involved in immunity to the necrotrophic fungal pathogen Botrytis cinerea.Activity detected in root, leaf, flower and cell culture.
[INTERPRO, BLASTED, ANNOTATED]	GFTW01035541.1	AT5G07050.1	707	20	1.58138e-43	73.25	2	C:GO:0016021; F:GO:0022857	C:integral component of membrane; F:transmembrane transporter activity			IPR000620 (PFAM); PTHR31218:SF234 (PANTHER); IPR030184 (PANTHER); SSF103481 (SUPERFAMILY)	C:GO:0016020; C:GO:0016021; F:GO:0022857	C:membrane; C:integral component of membrane; F:transmembrane transporter activity
[INTERPRO, BLASTED]	GFTW01036046.1	AT5G42480.2	779	4	1.91065e-70	60.6						mobidb-lite (MOBIDB_LITE); PTHR33925 (PANTHER); PTHR33925:SF3 (PANTHER); IPR036869 (SUPERFAMILY)	no GO terms	no GO terms
[INTERPRO, NO-BLAST]	GFTW01036159.1	---NA---	511									no IPS match	no IPS match	no IPS match
[INTERPRO, NO-BLAST]	GFTW01037153.1	---NA---	531									no IPS match	no IPS match	no IPS match
[INTERPRO, BLASTED, ANNOTATED]	GFTW01038305.1	AT2G37060.2	466	20	5.05585e-75	88.48	1	F:GO:0046982	F:protein heterodimerization activity			PR00615 (PRINTS); IPR003958 (PFAM); IPR009072 (G3DSA:1.10.20.GENE3D); mobidb-lite (MOBIDB_LITE); mobidb-lite (MOBIDB_LITE); mobidb-lite (MOBIDB_LITE); PTHR11064 (PANTHER); PTHR11064:SF97 (PANTHER); IPR009072 (SUPERFAMILY)	F:GO:0046982	F:protein heterodimerization activity
[INTERPRO, NO-BLAST]	GFTW01039094.1	---NA---	645									no IPS match	no IPS match	no IPS match
[INTERPRO, BLASTED]	GFTW01039699.1	AT2G25110.1	892	1	6.6601e-07	95.83						no IPS match	no IPS match	no IPS match
[INTERPRO, BLASTED, ANNOTATED]	GFTW01039936.1	AT2G28840.1	336	20	1.98941e-53	56.93	1	F:GO:0005515	F:protein binding			IPR002110 (SMART); IPR020683 (PFAM); IPR036770 (G3DSA:1.25.40.GENE3D); PTHR24128:SF52 (PANTHER); PTHR24128 (PANTHER); IPR002110 (PROSITE_PROFILES); IPR020683 (PROSITE_PROFILES); IPR002110 (PROSITE_PROFILES); IPR020683 (CDD); IPR036770 (SUPERFAMILY)	F:GO:0005515	F:protein binding
[INTERPRO, BLASTED, ANNOTATED]	GFTW01039938.1	AT2G28840.1	786	20	2.83485e-130	51	1	F:GO:0005515	F:protein binding			IPR002110 (SMART); IPR036770 (G3DSA:1.25.40.GENE3D); PF13857 (PFAM); IPR036770 (G3DSA:1.25.40.GENE3D); IPR020683 (PFAM); PTHR24128:SF14 (PANTHER); PTHR24128 (PANTHER); IPR020683 (PROSITE_PROFILES); IPR002110 (PROSITE_PROFILES); IPR002110 (PROSITE_PROFILES); IPR002110 (PROSITE_PROFILES); IPR002110 (PROSITE_PROFILES); IPR002110 (PROSITE_PROFILES); IPR020683 (CDD); IPR020683 (CDD); IPR036770 (SUPERF…	F:GO:0005515	F:protein binding
[INTERPRO, BLASTED, ANNOTATED]	GFTW01039957.1	AT1G13950.1	457	4	6.68654e-20	95	6	F:GO:0003746; C:GO:0005840; P:GO:0006452; F:GO:0043022; P:GO:0045901; P:GO:0045905	F:translation elongation factor activity; C:ribosome; P:translational frameshifting; F:ribosome binding; P:positive regulation of translational elongation; P:positive regulation of translational termination			IPR020189 (SMART); G3DSA:2.40.50.140 (GENE3D); IPR020189 (PFAM); IPR001884 (PANTHER); PTHR11673:SF32 (PANTHER); IPR012340 (SUPERFAMILY)	F:GO:0003723; F:GO:0003746; P:GO:0006452; F:GO:0043022; P:GO:0045901; P:GO:0045905	F:RNA binding; F:translation elongation factor activity; P:translational frameshifting; F:ribosome binding; P:positive regulation of translational elongation; P:positive regulation of translational termination
[INTERPRO, BLASTED, ANNOTATED]	GFTW01040102.1	AT1G07050.1	1269	20	5.75381e-31	70.17	1	F:GO:0005515	F:protein binding			IPR010402 (PFAM); PTHR31874:SF32 (PANTHER); PTHR31874 (PANTHER); IPR010402 (PROSITE_PROFILES)	F:GO:0005515	F:protein binding
[INTERPRO, BLASTED]	GFTW01040551.1	AT4G31980.1	1697	20	1.26144e-26	50.09						IPR004158 (PFAM); IPR004158 (PANTHER); PTHR31549:SF135 (PANTHER)	no GO terms	no GO terms
[INTERPRO, BLASTED]	GFTW01040630.1	AT2G03890.2	1262	15	6.62573e-103	63.48						IPR000403 (PFAM); PTHR45800 (PANTHER); PTHR45800:SF11 (PANTHER)	no GO terms	no GO terms
[INTERPRO, BLASTED]	GFTW01040903.1	AT2G43020.1	718	3	1.65139e-13	89.19						no IPS match	no IPS match	no IPS match
[INTERPRO, NO-BLAST, ANNOTATED]	GFTW01040971.1	---NA---	616				3	F:GO:0003677; C:GO:0005634; P:GO:0006355	F:DNA binding; C:nucleus; P:regulation of transcription, DNA-templated			IPR006779 (PFAM); PTHR35298:SF1 (PANTHER); IPR006779 (PANTHER)	F:GO:0003677; C:GO:0005634; P:GO:0006355	F:DNA binding; C:nucleus; P:regulation of transcription, DNA-templated
[INTERPRO, NO-BLAST]	GFTW01041229.1	---NA---	503									PTHR36346 (PANTHER)	no GO terms	no GO terms
[INTERPRO, BLASTED]	GFTW01041371.1	AT2G24210.1	397	7	1.26096e-25	60.26						IPR008949 (G3DSA:1.10.600.GENE3D); PTHR31225 (PANTHER); PTHR31225:SF9 (PANTHER); IPR008949 (SUPERFAMILY)	no GO terms	no GO terms
[INTERPRO, NO-BLAST]	GFTW01041606.1	---NA---	378									no IPS match	no IPS match	no IPS match
[INTERPRO, BLASTED, ANNOTATED]	GFTW01042214.1	AT5G55160.1	609	18	2.74281e-57	67.64	2	F:GO:0005515; P:GO:0016925	F:protein binding; P:protein sumoylation			IPR000626 (SMART); IPR022617 (PFAM); G3DSA:3.10.20.90 (GENE3D); mobidb-lite (MOBIDB_LITE); PTHR10562 (PANTHER); PTHR10562:SF84 (PANTHER); IPR000626 (PROSITE_PROFILES); IPR033950 (CDD); IPR029071 (SUPERFAMILY)	F:GO:0005515; P:GO:0016925	F:protein binding; P:protein sumoylation
[INTERPRO, NO-BLAST]	GFTW01043716.1	---NA---	745									no IPS match	no IPS match	no IPS match
[INTERPRO, BLASTED]	GFTW01044868.1	AT5G35110.1	804	2	2.22954e-15	62.07						mobidb-lite (MOBIDB_LITE); PTHR35121 (PANTHER); PTHR35121:SF2 (PANTHER)	no GO terms	no GO terms
[INTERPRO, NO-BLAST]	GFTW01045620.1	---NA---	392									no IPS match	no IPS match	no IPS match
[INTERPRO, BLASTED, ANNOTATED]	GFTW01046025.1	AT2G17570.1	297	3	1.35233e-12	81.5	1	F:GO:0016765	F:transferase activity, transferring alkyl or aryl (other than methyl) groups			IPR036424 (G3DSA:3.40.1180.GENE3D); IPR001441 (PFAM); PTHR10291:SF30 (PANTHER); IPR001441 (PANTHER); IPR036424 (SUPERFAMILY)	F:GO:0016765	F:transferase activity, transferring alkyl or aryl (other than methyl) groups
[INTERPRO, BLASTED]	GFTW01046265.1	AT3G20340.1	1024	1	7.14541e-12	50.86						mobidb-lite (MOBIDB_LITE); mobidb-lite (MOBIDB_LITE); PTHR33647 (PANTHER); PTHR33647:SF5 (PANTHER)	no GO terms	no GO terms
[INTERPRO, NO-BLAST]	GFTW01046338.1	---NA---	550									no IPS match	no IPS match	no IPS match
[INTERPRO, BLASTED, ANNOTATED]	GFTW01046633.1	AT4G33040.1	719	8	4.45303e-24	60.64	4	P:GO:0006118; F:GO:0009055; F:GO:0015035; P:GO:0045454	P:obsolete electron transport; F:electron transfer activity; F:protein disulfide oxidoreductase activity; P:cell redox homeostasis			IPR011905 (TIGRFAM); G3DSA:3.40.30.10 (GENE3D); IPR002109 (PFAM); PTHR10168 (PANTHER); PTHR10168:SF56 (PANTHER); IPR002109 (PROSITE_PROFILES); IPR036249 (SUPERFAMILY)	F:GO:0009055; F:GO:0015035; P:GO:0045454	F:electron transfer activity; F:protein disulfide oxidoreductase activity; P:cell redox homeostasis
[INTERPRO, NO-BLAST]	GFTW01047808.1	---NA---	624									no IPS match	no IPS match	no IPS match
[INTERPRO, BLASTED, ANNOTATED]	GFTW01048067.1	AT2G26600.2	663	20	5.8866e-59	69.24	2	F:GO:0004553; P:GO:0005975	F:hydrolase activity, hydrolyzing O-glycosyl compounds; P:carbohydrate metabolic process			IPR000490 (PFAM); G3DSA:3.20.20.80 (GENE3D); PTHR32227 (PANTHER); PTHR32227:SF129 (PANTHER); IPR017853 (SUPERFAMILY)	F:GO:0004553; P:GO:0005975	F:hydrolase activity, hydrolyzing O-glycosyl compounds; P:carbohydrate metabolic process
[INTERPRO, NO-BLAST]	GFTW01048259.1	---NA---	717									mobidb-lite (MOBIDB_LITE); mobidb-lite (MOBIDB_LITE)	no GO terms	no GO terms
[INTERPRO, BLASTED, ANNOTATED]	GFTW01048989.1	AT3G08710.2	882	20	3.54562e-56	65.39	4	P:GO:0006118; P:GO:0006662; F:GO:0015035; P:GO:0045454	P:obsolete electron transport; P:glycerol ether metabolic process; F:protein disulfide oxidoreductase activity; P:cell redox homeostasis			PR00421 (PRINTS); IPR013766 (PFAM); IPR005746 (PIRSF); G3DSA:3.40.30.10 (GENE3D); mobidb-lite (MOBIDB_LITE); PTHR10438 (PANTHER); PTHR10438:SF390 (PANTHER); IPR013766 (PROSITE_PROFILES); cd02947 (CDD); IPR036249 (SUPERFAMILY)	P:GO:0006662; F:GO:0015035; P:GO:0045454	P:glycerol ether metabolic process; F:protein disulfide oxidoreductase activity; P:cell redox homeostasis
[INTERPRO, BLASTED, ANNOTATED]	GFTW01050259.1	AT5G36110.2	754	20	8.78985e-72	50.12	4	F:GO:0005506; F:GO:0016705; F:GO:0020037; P:GO:0055114	F:iron ion binding; F:oxidoreductase activity, acting on paired donors, with incorporation or reduction of molecular oxygen; F:heme binding; P:oxidation-reduction process			IPR036396 (G3DSA:1.10.630.GENE3D); PTHR24286 (PANTHER); PTHR24286:SF248 (PANTHER); IPR036396 (SUPERFAMILY)	F:GO:0005506; F:GO:0016705; F:GO:0020037; P:GO:0055114	F:iron ion binding; F:oxidoreductase activity, acting on paired donors, with incorporation or reduction of molecular oxygen; F:heme binding; P:oxidation-reduction process
[INTERPRO, BLASTED, ANNOTATED]	GFTW01050302.1	AT5G05365.1	494	20	7.59283e-29	63.5	2	P:GO:0030001; F:GO:0046872	P:metal ion transport; F:metal ion binding			IPR006121 (PFAM); G3DSA:3.30.70.100 (GENE3D); PTHR22814 (PANTHER); PTHR22814:SF304 (PANTHER); IPR006121 (PROSITE_PROFILES); IPR006121 (CDD); IPR036163 (SUPERFAMILY)	P:GO:0030001; F:GO:0046872	P:metal ion transport; F:metal ion binding
[INTERPRO, NO-BLAST]	GFTW01050777.1	---NA---	990									no IPS match	no IPS match	no IPS match
[INTERPRO, BLASTED]	GFTW01051943.1	AT4G19390.1	354	3	5.59726e-08	79.95						no IPS match	no IPS match	no IPS match
[INTERPRO, BLASTED, ANNOTATED]	GFTW01052214.1	AT5G54770.1	2684	1	3.65397e-178	88.1	1	P:GO:0009228	P:thiamine biosynthetic process			IPR036188 (G3DSA:3.50.50.GENE3D); PF01946 (PFAM); IPR002922 (TIGRFAM); PTHR43422:SF7 (PANTHER); PTHR43422 (PANTHER); IPR027495 (HAMAP); IPR036188 (SUPERFAMILY)	P:GO:0009228	P:thiamine biosynthetic process
[INTERPRO, BLASTED]	GFTW01052431.1	AT5G19010.1	931	20	4.31774e-09	82.05						no IPS match	no IPS match	no IPS match
[INTERPRO, NO-BLAST]	GFTW01052754.1	---NA---	684									PTHR36617 (PANTHER)	no GO terms	no GO terms
[INTERPRO, BLASTED, ANNOTATED]	GFTW01052929.1	AT1G10760.2	1170	8	9.7909e-177	76.2	3	F:GO:0005524; F:GO:0016301; P:GO:0016310	F:ATP binding; F:kinase activity; P:phosphorylation			IPR002192 (PFAM); IPR013815 (G3DSA:3.30.1490.GENE3D); PTHR46999 (PANTHER); SSF56059 (SUPERFAMILY)	F:GO:0005524; F:GO:0016301; P:GO:0016310	F:ATP binding; F:kinase activity; P:phosphorylation
[INTERPRO, BLASTED, ANNOTATED]	GFTW01053189.1	AT3G30280.1	1673	20	3.9188e-55	46.24	1	F:GO:0016747	F:transferase activity, transferring acyl groups other than amino-acyl groups			IPR023213 (G3DSA:3.30.559.GENE3D); IPR023213 (G3DSA:3.30.559.GENE3D); IPR003480 (PFAM); PTHR31623:SF35 (PANTHER); PTHR31623 (PANTHER)	F:GO:0016747	F:transferase activity, transferring acyl groups other than amino-acyl groups
[INTERPRO, BLASTED]	GFTW01053560.1	AT4G27960.1	753	20	1.0484e-37	92.9						IPR016135 (G3DSA:3.10.110.GENE3D); IPR000608 (PFAM); PTHR24068 (PANTHER); PTHR24068:SF150 (PANTHER); IPR000608 (PROSITE_PROFILES); IPR016135 (SUPERFAMILY)	no GO terms	no GO terms
[INTERPRO, BLASTED, ANNOTATED]	GFTW01053817.1	AT4G13480.1	904	20	1.11489e-68	81.78	1	F:GO:0003677	F:DNA binding			IPR001005 (SMART); G3DSA:1.10.10.60 (GENE3D); G3DSA:1.10.10.60 (GENE3D); IPR001005 (PFAM); PTHR45675:SF3 (PANTHER); PTHR45675 (PANTHER); IPR017930 (PROSITE_PROFILES); IPR017930 (PROSITE_PROFILES); IPR001005 (CDD); IPR001005 (CDD); IPR009057 (SUPERFAMILY)	F:GO:0003677	F:DNA binding
[INTERPRO, NO-BLAST]	GFTW01053904.1	---NA---	771									mobidb-lite (MOBIDB_LITE); mobidb-lite (MOBIDB_LITE)	no GO terms	no GO terms
[INTERPRO, BLASTED]	GFTW01053968.1	AT2G33500.1	699	12	3.01797e-06	84.26						no IPS match	no IPS match	no IPS match
[INTERPRO, NO-BLAST]	GFTW01054179.1	---NA---	489									no IPS match	no IPS match	no IPS match
[INTERPRO, NO-BLAST]	GFTW01054180.1	---NA---	639									no IPS match	no IPS match	no IPS match
[INTERPRO, BLASTED]	GFTW01054387.1	AT4G25990.2	600	7	1.03091e-06	87.57						mobidb-lite (MOBIDB_LITE); PTHR31874 (PANTHER); PTHR31874:SF10 (PANTHER)	no GO terms	no GO terms
[INTERPRO, NO-BLAST]	GFTW01054607.1	---NA---	942									no IPS match	no IPS match	no IPS match
[INTERPRO, BLASTED, ANNOTATED]	GFTW01054618.1	AT3G60540.2	714	9	1.1674e-22	94.85	2	C:GO:0005784; P:GO:0006886	C:Sec61 translocon complex; P:intracellular protein transport			IPR030671 (PIRSF); IPR016482 (PFAM); mobidb-lite (MOBIDB_LITE); IPR030671 (PANTHER); PTHR13509:SF2 (PANTHER)	C:GO:0005784; P:GO:0006886	C:Sec61 translocon complex; P:intracellular protein transport
[INTERPRO, BLASTED, ANNOTATED]	GFTW01055420.1	AT5G18840.1	775	20	2.29612e-81	76.19	3	C:GO:0016021; F:GO:0022857; P:GO:0055085	C:integral component of membrane; F:transmembrane transporter activity; P:transmembrane transport			IPR005828 (PFAM); G3DSA:1.20.1250.20 (GENE3D); PTHR23500 (PANTHER); PTHR23500:SF513 (PANTHER); IPR020846 (PROSITE_PROFILES); IPR020846 (CDD); IPR036259 (SUPERFAMILY)	C:GO:0016021; F:GO:0022857; P:GO:0055085	C:integral component of membrane; F:transmembrane transporter activity; P:transmembrane transport
[INTERPRO, BLASTED, ANNOTATED]	GFTW01055628.1	AT5G43270.2	1626	20	3.90075e-46	61.2	2	F:GO:0003677; C:GO:0005634	F:DNA binding; C:nucleus			IPR004333 (PFAM); IPR036893 (G3DSA:4.10.1100.GENE3D); mobidb-lite (MOBIDB_LITE); PTHR31251:SF74 (PANTHER); PTHR31251 (PANTHER); IPR004333 (PROSITE_PROFILES); IPR036893 (SUPERFAMILY)	F:GO:0003677; C:GO:0005634	F:DNA binding; C:nucleus
[INTERPRO, BLASTED]	GFTW01056960.1	AT2G24940.1	848	6	9.59556e-46	66.84						IPR001199 (SMART); IPR036400 (G3DSA:3.10.120.GENE3D); IPR001199 (PFAM); PTHR10281:SF76 (PANTHER); PTHR10281 (PANTHER); IPR036400 (SUPERFAMILY)	no GO terms	no GO terms
[INTERPRO, NO-BLAST]	GFTW01057695.1	---NA---	478									mobidb-lite (MOBIDB_LITE); mobidb-lite (MOBIDB_LITE)	no GO terms	no GO terms
[INTERPRO, BLASTED]	GFTW01058004.1	AT4G03400.1	2210	20	0	60.57						IPR004993 (PFAM); PTHR31901:SF48 (PANTHER); IPR004993 (PANTHER)	no GO terms	no GO terms
[INTERPRO, BLASTED, ANNOTATED]	GFTW01058418.1	AT2G38670.1	1566	3	0	68.85	2	F:GO:0003824; P:GO:0009058	F:catalytic activity; P:biosynthetic process			IPR014729 (G3DSA:3.40.50.GENE3D); IPR004821 (PFAM); IPR004821 (TIGRFAM); IPR014729 (G3DSA:3.40.50.GENE3D); PTHR45780 (PANTHER); PTHR45780:SF5 (PANTHER); cd02173 (CDD); IPR041723 (CDD); SSF52374 (SUPERFAMILY); SSF52374 (SUPERFAMILY)	F:GO:0003824; P:GO:0009058	F:catalytic activity; P:biosynthetic process
[INTERPRO, BLASTED, ANNOTATED]	GFTW01058657.1	AT1G67250.1	961	4	3.45833e-64	72.44	1	P:GO:0043248	P:proteasome assembly			IPR008012 (PFAM); PTHR12828:SF3 (PANTHER); IPR008012 (PANTHER)	P:GO:0043248	P:proteasome assembly
[INTERPRO, BLASTED, ANNOTATED]	GFTW01058770.1	AT2G18050.1	882	16	1.49357e-33	67.77	4	C:GO:0000786; F:GO:0003677; C:GO:0005634; P:GO:0006334	C:nucleosome; F:DNA binding; C:nucleus; P:nucleosome assembly			IPR005819 (PRINTS); IPR005818 (SMART); IPR036388 (G3DSA:1.10.10.GENE3D); IPR005818 (PFAM); mobidb-lite (MOBIDB_LITE); mobidb-lite (MOBIDB_LITE); mobidb-lite (MOBIDB_LITE); mobidb-lite (MOBIDB_LITE); PTHR11467:SF50 (PANTHER); PTHR11467 (PANTHER); IPR005818 (PROSITE_PROFILES); IPR005818 (CDD); IPR036390 (SUPERFAMILY)	C:GO:0000786; F:GO:0003677; C:GO:0005634; P:GO:0006334	C:nucleosome; F:DNA binding; C:nucleus; P:nucleosome assembly
[INTERPRO, NO-BLAST]	GFTW01059226.1	---NA---	825									no IPS match	no IPS match	no IPS match
[INTERPRO, BLASTED, ANNOTATED]	GFTW01059444.1	AT3G02780.1	2637	3	9.44982e-142	90.89	4	F:GO:0004452; P:GO:0006694; P:GO:0016114; F:GO:0016787	F:isopentenyl-diphosphate delta-isomerase activity; P:steroid biosynthetic process; P:terpenoid biosynthetic process; F:hydrolase activity			IPR000086 (PFAM); IPR011876 (PIRSF); IPR011876 (TIGRFAM); G3DSA:3.90.79.10 (GENE3D); PTHR10885 (PANTHER); PTHR10885:SF6 (PANTHER); IPR000086 (PROSITE_PROFILES); IPR011876 (CDD); IPR015797 (SUPERFAMILY)	F:GO:0004452; P:GO:0008299; F:GO:0016787	F:isopentenyl-diphosphate delta-isomerase activity; P:isoprenoid biosynthetic process; F:hydrolase activity
[INTERPRO, BLASTED]	GFTW01060053.1	AT2G47485.1	1206	3	2.1839e-08	58.48						PTHR33702:SF5 (PANTHER); PTHR33702 (PANTHER)	no GO terms	no GO terms
[INTERPRO, NO-BLAST]	GFTW01060054.1	---NA---	607									no IPS match	no IPS match	no IPS match
[INTERPRO, NO-BLAST, ANNOTATED]	GFTW01060087.1	---NA---	1996				1	F:GO:0003824	F:catalytic activity			IPR015421 (G3DSA:3.40.640.GENE3D); IPR000192 (PFAM); IPR015422 (G3DSA:3.90.1150.GENE3D); PTHR43586 (PANTHER); PTHR43586:SF19 (PANTHER); IPR015424 (SUPERFAMILY)	F:GO:0003824	F:catalytic activity
[INTERPRO, BLASTED]	GFTW01060204.1	AT1G68490.1	952	2	0.000200255	45.1						PTHR33384:SF1 (PANTHER); PTHR33384 (PANTHER)	no GO terms	no GO terms
[INTERPRO, NO-BLAST]	GFTW01060623.1	---NA---	648									no IPS match	no IPS match	no IPS match
[INTERPRO, BLASTED, ANNOTATED]	GFTW01060632.1	AT5G20740.1	812	20	2.68161e-53	59.03	1	F:GO:0004857	F:enzyme inhibitor activity			IPR006501 (SMART); IPR006501 (PFAM); IPR006501 (TIGRFAM); IPR035513 (G3DSA:1.20.140.GENE3D); PTHR31080 (PANTHER); PTHR31080:SF160 (PANTHER); cd15798 (CDD); IPR035513 (SUPERFAMILY)	F:GO:0004857	F:enzyme inhibitor activity
[INTERPRO, NO-BLAST]	GFTW01061688.1	---NA---	651									IPR024489 (PFAM); mobidb-lite (MOBIDB_LITE); PTHR33731:SF11 (PANTHER); PTHR33731 (PANTHER); IPR024489 (PRODOM)	no GO terms	no GO terms
[INTERPRO, BLASTED]	GFTW01061918.1	AT5G42480.1	468	4	7.70597e-48	64.47						IPR025344 (PFAM); PTHR33925:SF3 (PANTHER); PTHR33925 (PANTHER)	no GO terms	no GO terms
[INTERPRO, NO-BLAST]	GFTW01062567.1	---NA---	261									no IPS match	no IPS match	no IPS match
[INTERPRO, NO-BLAST]	GFTW01062686.1	---NA---	345									no IPS match	no IPS match	no IPS match
[INTERPRO, BLASTED]	GFTW01063884.1	AT1G15340.1	887	4	1.50209e-21	85.44						mobidb-lite (MOBIDB_LITE); mobidb-lite (MOBIDB_LITE); mobidb-lite (MOBIDB_LITE); IPR039622 (PANTHER)	no GO terms	no GO terms
[INTERPRO, BLASTED]	GFTW01064249.1	AT1G53540.1	447	12	3.00702e-34	79.09						IPR002068 (PFAM); IPR008978 (G3DSA:2.60.40.GENE3D); mobidb-lite (MOBIDB_LITE); PTHR11527:SF282 (PANTHER); IPR031107 (PANTHER); IPR002068 (PROSITE_PROFILES); IPR008978 (SUPERFAMILY)	no GO terms	no GO terms
[INTERPRO, BLASTED]	GFTW01064402.1	AT3G56490.1	677	5	4.26644e-69	71.95						IPR001310 (PFAM); IPR036265 (G3DSA:3.30.428.GENE3D); PTHR23089:SF40 (PANTHER); PTHR23089 (PANTHER); IPR036265 (SUPERFAMILY)	no GO terms	no GO terms
[INTERPRO, BLASTED, ANNOTATED]	GFTW01064403.1	AT3G56490.1	605	5	1.57928e-82	70.21	1	F:GO:0003824	F:catalytic activity			IPR001310 (PRINTS); IPR001310 (PFAM); IPR036265 (G3DSA:3.30.428.GENE3D); PTHR23089 (PANTHER); PTHR23089:SF40 (PANTHER); IPR011146 (PROSITE_PROFILES); cd01276 (CDD); IPR036265 (SUPERFAMILY)	F:GO:0003824	F:catalytic activity
[INTERPRO, BLASTED, ANNOTATED]	GFTW01064547.1	AT2G01060.1	1073	20	1.0279e-49	69.91	1	F:GO:0003677	F:DNA binding			IPR025756 (PFAM); G3DSA:1.10.10.60 (GENE3D); IPR006447 (TIGRFAM); IPR001005 (PFAM); PTHR31314:SF73 (PANTHER); PTHR31314 (PANTHER); IPR017930 (PROSITE_PROFILES); IPR009057 (SUPERFAMILY)	F:GO:0003677	F:DNA binding
[INTERPRO, BLASTED, ANNOTATED]	GFTW01065088.1	AT1G80300.1	2308	2	0	83.94	3	F:GO:0005471; P:GO:0006862; C:GO:0016021	F:ATP:ADP antiporter activity; P:nucleotide transport; C:integral component of membrane			IPR004667 (PFAM); IPR004667 (TIGRFAM); mobidb-lite (MOBIDB_LITE); mobidb-lite (MOBIDB_LITE); IPR004667 (PANTHER); PTHR31187:SF6 (PANTHER); IPR036259 (SUPERFAMILY)	F:GO:0005471; P:GO:0006862; C:GO:0016021	F:ATP:ADP antiporter activity; P:nucleotide transport; C:integral component of membrane
[INTERPRO, BLASTED]	GFTW01065432.1	AT1G68620.1	243	8	8.59047e-09	59.89						IPR029058 (G3DSA:3.40.50.GENE3D); PTHR23024 (PANTHER); PTHR23024:SF135 (PANTHER); IPR029058 (SUPERFAMILY)	no GO terms	no GO terms
[INTERPRO, BLASTED]	GFTW01065434.1	AT5G54855.1	895	1	1.73614e-69	79.31						PF01190 (PFAM); mobidb-lite (MOBIDB_LITE); mobidb-lite (MOBIDB_LITE); PTHR38400 (PANTHER)	no GO terms	no GO terms
[INTERPRO, NO-BLAST]	GFTW01065453.1	---NA---	730									no IPS match	no IPS match	no IPS match
[INTERPRO, BLASTED, ANNOTATED]	GFTW01065759.1	AT5G57190.2	669	20	4.0232e-69	56.74	6	F:GO:0004609; P:GO:0006544; P:GO:0006563; P:GO:0006566; P:GO:0008654; P:GO:0046486	F:phosphatidylserine decarboxylase activity; P:glycine metabolic process; P:L-serine metabolic process; P:threonine metabolic process; P:phospholipid biosynthetic process; P:glycerolipid metabolic process			PTHR10067:SF2 (PANTHER); IPR003817 (PANTHER)	F:GO:0004609; P:GO:0008654	F:phosphatidylserine decarboxylase activity; P:phospholipid biosynthetic process
[INTERPRO, NO-BLAST]	GFTW01067328.1	---NA---	689									no IPS match	no IPS match	no IPS match
[INTERPRO, BLASTED, ANNOTATED]	GFTW01067573.1	AT4G14580.1	759	20	2.67383e-64	71.75	3	F:GO:0004672; F:GO:0005524; P:GO:0006468	F:protein kinase activity; F:ATP binding; P:protein phosphorylation			IPR000719 (SMART); IPR000719 (PFAM); G3DSA:1.10.510.10 (GENE3D); PTHR24343 (PANTHER); PTHR24343:SF373 (PANTHER); IPR000719 (PROSITE_PROFILES); IPR011009 (SUPERFAMILY)	F:GO:0004672; F:GO:0005524; P:GO:0006468	F:protein kinase activity; F:ATP binding; P:protein phosphorylation
[INTERPRO, BLASTED, ANNOTATED]	GFTW01067788.1	AT5G13070.1	1018	1	1.59152e-113	93.37	1	C:GO:0005758	C:mitochondrial intermembrane space			IPR006797 (PFAM); PTHR11158:SF17 (PANTHER); IPR037365 (PANTHER); IPR006797 (PROSITE_PROFILES)	C:GO:0005758	C:mitochondrial intermembrane space
[INTERPRO, BLASTED, ANNOTATED]	GFTW01067934.1	AT3G25830.1	1342	20	3.39756e-127	59.27	2	F:GO:0000287; F:GO:0010333	F:magnesium ion binding; F:terpene synthase activity			IPR008949 (G3DSA:1.10.600.GENE3D); IPR036965 (G3DSA:1.50.10.GENE3D); IPR001906 (PFAM); IPR005630 (PFAM); IPR034741 (PANTHER); PTHR31225:SF9 (PANTHER); cd00684 (CDD); IPR008930 (SUPERFAMILY); IPR008949 (SUPERFAMILY)	F:GO:0000287; F:GO:0010333; F:GO:0016829	F:magnesium ion binding; F:terpene synthase activity; F:lyase activity
[INTERPRO, BLASTED, ANNOTATED]	GFTW01068295.1	AT3G07360.1	1745	20	1.91618e-170	67.42	3	F:GO:0004842; F:GO:0005515; P:GO:0016567	F:ubiquitin-protein transferase activity; F:protein binding; P:protein ubiquitination			IPR003613 (SMART); IPR013083 (G3DSA:3.30.40.GENE3D); IPR003613 (PFAM); IPR011989 (G3DSA:1.25.10.GENE3D); IPR000225 (PFAM); PTHR23315 (PANTHER); PTHR23315:SF253 (PANTHER); IPR003613 (PROSITE_PROFILES); cd16664 (CDD); SSF57850 (SUPERFAMILY); IPR016024 (SUPERFAMILY)	F:GO:0004842; F:GO:0005515; P:GO:0016567	F:ubiquitin-protein transferase activity; F:protein binding; P:protein ubiquitination
[INTERPRO, BLASTED, ANNOTATED]	GFTW01068557.1	AT3G63060.1	1430	3	1.78963e-95	65.76	1	F:GO:0005515	F:protein binding			IPR040267 (PANTHER); PTHR31348:SF3 (PANTHER); IPR036047 (SUPERFAMILY)	F:GO:0005515	F:protein binding
[INTERPRO, BLASTED, ANNOTATED]	GFTW01069337.1	AT2G20900.3	1888	14	0	59.17	7	F:GO:0003951; F:GO:0004143; P:GO:0006769; P:GO:0007205; P:GO:0009395; P:GO:0046486; P:GO:0046497	F:NAD+ kinase activity; F:diacylglycerol kinase activity; P:nicotinamide metabolic process; P:protein kinase C-activating G protein-coupled receptor signaling pathway; P:phospholipid catabolic process; P:glycerolipid metabolic process; P:nicotinate nucleotide metabolic process			IPR000756 (SMART); IPR001206 (SMART); IPR017438 (G3DSA:3.40.50.GENE3D); IPR000756 (PFAM); G3DSA:2.60.200.40 (GENE3D); IPR001206 (PFAM); mobidb-lite (MOBIDB_LITE); mobidb-lite (MOBIDB_LITE); PTHR11255:SF29 (PANTHER); IPR037607 (PANTHER); IPR001206 (PROSITE_PROFILES); IPR016064 (SUPERFAMILY)	F:GO:0003951; F:GO:0004143; P:GO:0007165; P:GO:0007205; F:GO:0016301	F:NAD+ kinase activity; F:diacylglycerol kinase activity; P:signal transduction; P:protein kinase C-activating G protein-coupled receptor signaling pathway; F:kinase activity
[INTERPRO, NO-BLAST]	GFTW01069431.1	---NA---	2034									no IPS match	no IPS match	no IPS match
[INTERPRO, BLASTED, ANNOTATED]	GFTW01069631.1	AT5G08520.1	549	20	6.95437e-55	86.01	1	F:GO:0003677	F:DNA binding			IPR001005 (PFAM); IPR006447 (TIGRFAM); G3DSA:1.10.10.60 (GENE3D); mobidb-lite (MOBIDB_LITE); PTHR44191 (PANTHER); PTHR44191:SF21 (PANTHER); IPR017930 (PROSITE_PROFILES); IPR001005 (CDD); IPR009057 (SUPERFAMILY)	F:GO:0003677	F:DNA binding
[INTERPRO, BLASTED, ANNOTATED]	GFTW01070038.1	AT4G18910.1	1278	20	2.62007e-71	62.8	3	F:GO:0015267; C:GO:0016020; P:GO:0055085	F:channel activity; C:membrane; P:transmembrane transport			IPR000425 (PRINTS); IPR000425 (PFAM); IPR023271 (G3DSA:1.20.1080.GENE3D); IPR034294 (PANTHER); PTHR45724:SF9 (PANTHER); IPR000425 (CDD); IPR023271 (SUPERFAMILY)	F:GO:0015267; C:GO:0016020; P:GO:0055085	F:channel activity; C:membrane; P:transmembrane transport
[INTERPRO, BLASTED, ANNOTATED]	GFTW01070176.1	AT3G52730.1	595	2	2.16213e-34	87.51	2	C:GO:0005750; P:GO:0006122	C:mitochondrial respiratory chain complex III; P:mitochondrial electron transport, ubiquinol to cytochrome c			IPR036656 (G3DSA:1.20.5.GENE3D); IPR008027 (PFAM); IPR008027 (PANTHER); PTHR12980:SF1 (PANTHER); IPR036656 (SUPERFAMILY)	C:GO:0005743; C:GO:0005750; P:GO:0006122	C:mitochondrial inner membrane; C:mitochondrial respiratory chain complex III; P:mitochondrial electron transport, ubiquinol to cytochrome c
[INTERPRO, NO-BLAST]	GFTW01070779.1	---NA---	422									mobidb-lite (MOBIDB_LITE); mobidb-lite (MOBIDB_LITE); PTHR33731 (PANTHER); PTHR33731:SF11 (PANTHER); IPR024489 (PRODOM)	no GO terms	no GO terms
[INTERPRO, NO-BLAST]	GFTW01070791.1	---NA---	314									no IPS match	no IPS match	no IPS match
[INTERPRO, NO-BLAST]	GFTW01070792.1	---NA---	468									IPR024489 (PFAM); PTHR33731 (PANTHER); PTHR33731:SF11 (PANTHER); IPR024489 (PRODOM)	no GO terms	no GO terms
[INTERPRO, NO-BLAST]	GFTW01070802.1	---NA---	241									no IPS match	no IPS match	no IPS match
[INTERPRO, NO-BLAST]	GFTW01070812.1	---NA---	313									no IPS match	no IPS match	no IPS match
[INTERPRO, NO-BLAST]	GFTW01070819.1	---NA---	340									no IPS match	no IPS match	no IPS match
[INTERPRO, NO-BLAST]	GFTW01070820.1	---NA---	580									mobidb-lite (MOBIDB_LITE)	no GO terms	no GO terms
[INTERPRO, NO-BLAST]	GFTW01070821.1	---NA---	314									no IPS match	no IPS match	no IPS match
[INTERPRO, NO-BLAST]	GFTW01070833.1	---NA---	320									no IPS match	no IPS match	no IPS match
[INTERPRO, BLASTED, ANNOTATED]	GFTW01072004.1	AT4G16740.4	1012	20	7.20858e-67	57.27	2	F:GO:0000287; F:GO:0010333	F:magnesium ion binding; F:terpene synthase activity			IPR005630 (PFAM); IPR001906 (PFAM); IPR036965 (G3DSA:1.50.10.GENE3D); IPR008949 (G3DSA:1.10.600.GENE3D); PTHR31225:SF9 (PANTHER); PTHR31225 (PANTHER); IPR008930 (SUPERFAMILY); IPR008949 (SUPERFAMILY)	F:GO:0000287; F:GO:0010333; F:GO:0016829	F:magnesium ion binding; F:terpene synthase activity; F:lyase activity
[INTERPRO, NO-BLAST]	GFTW01072057.1	---NA---	751									no IPS match	no IPS match	no IPS match
[INTERPRO, NO-BLAST]	GFTW01072177.1	---NA---	556									no IPS match	no IPS match	no IPS match
[INTERPRO, BLASTED, ANNOTATED]	GFTW01073770.1	AT2G31200.1	344	20	1.27904e-63	82.69	3	F:GO:0003779; C:GO:0015629; P:GO:0030042	F:actin binding; C:actin cytoskeleton; P:actin filament depolymerization			IPR002108 (SMART); IPR029006 (G3DSA:3.40.20.GENE3D); IPR002108 (PFAM); PTHR11913:SF64 (PANTHER); IPR017904 (PANTHER); IPR002108 (PROSITE_PROFILES); IPR017904 (CDD); SSF55753 (SUPERFAMILY)	F:GO:0003779; C:GO:0015629; P:GO:0030042	F:actin binding; C:actin cytoskeleton; P:actin filament depolymerization
[INTERPRO, BLASTED]	GFTW01075523.1	AT3G53010.1	1172	3	2.20995e-90	71.96						IPR005181 (PFAM); IPR036514 (G3DSA:3.40.50.GENE3D); PTHR31988 (PANTHER); PTHR31988:SF12 (PANTHER); SSF52266 (SUPERFAMILY)	no GO terms	no GO terms
[INTERPRO, BLASTED]	GFTW01075606.1	AT5G66440.1	940	2	2.6067e-21	56.29						PTHR33640 (PANTHER); PTHR33640:SF3 (PANTHER)	no GO terms	no GO terms
[INTERPRO, BLASTED, ANNOTATED]	GFTW01076020.1	AT5G63670.1	470	4	1.51535e-43	84.55	3	C:GO:0005634; F:GO:0008270; P:GO:0032786	C:nucleus; F:zinc ion binding; P:positive regulation of DNA-templated transcription, elongation			IPR022800 (SMART); IPR038510 (G3DSA:3.30.40.GENE3D); IPR022800 (PFAM); PTHR12882:SF4 (PANTHER); IPR009287 (PANTHER); IPR022800 (CDD); IPR029040 (SUPERFAMILY)	C:GO:0005634; P:GO:0006355; F:GO:0008270; P:GO:0032786	C:nucleus; P:regulation of transcription, DNA-templated; F:zinc ion binding; P:positive regulation of DNA-templated transcription, elongation
[INTERPRO, NO-BLAST]	GFTW01076571.1	---NA---	1047									no IPS match	no IPS match	no IPS match
[INTERPRO, BLASTED]	GFTW01076826.1	AT4G02450.2	1120	5	2.67245e-40	70.78						IPR008978 (G3DSA:2.60.40.GENE3D); IPR007052 (PFAM); mobidb-lite (MOBIDB_LITE); mobidb-lite (MOBIDB_LITE); PTHR22932:SF8 (PANTHER); PTHR22932 (PANTHER); IPR007052 (PROSITE_PROFILES); cd06465 (CDD); IPR008978 (SUPERFAMILY)	no GO terms	no GO terms
[INTERPRO, NO-BLAST]	GFTW01076881.1	---NA---	741									no IPS match	no IPS match	no IPS match
[INTERPRO, NO-BLAST]	GFTW01076910.1	---NA---	729									no IPS match	no IPS match	no IPS match
[INTERPRO, BLASTED, ANNOTATED]	GFTW01077079.1	AT5G24920.1	891	5	5.30244e-11	62.08	1	P:GO:0080143	P:regulation of amino acid export			mobidb-lite (MOBIDB_LITE); IPR040359 (PANTHER); PTHR33228:SF34 (PANTHER)	P:GO:0080143	P:regulation of amino acid export
[INTERPRO, BLASTED, ANNOTATED]	GFTW01077608.1	AT1G78600.1	1498	17	2.63249e-66	58.06	1	F:GO:0008270	F:zinc ion binding			IPR000315 (SMART); G3DSA:3.30.40.200 (GENE3D); IPR000315 (PFAM); mobidb-lite (MOBIDB_LITE); PTHR31832:SF37 (PANTHER); PTHR31832 (PANTHER); IPR000315 (PROSITE_PROFILES); IPR000315 (PROSITE_PROFILES); IPR000315 (CDD); IPR000315 (CDD)	F:GO:0008270	F:zinc ion binding
[INTERPRO, BLASTED]	GFTW01077668.1	AT2G37025.1	1805	8	1.1041e-25	50.58						G3DSA:1.10.246.220 (GENE3D); mobidb-lite (MOBIDB_LITE); mobidb-lite (MOBIDB_LITE); PTHR47122 (PANTHER); PTHR47122:SF5 (PANTHER)	no GO terms	no GO terms
[INTERPRO, BLASTED]	GFTW01077804.1	AT2G39050.1	1391	1	1.91212e-71	79.14						G3DSA:2.80.10.50 (GENE3D); mobidb-lite (MOBIDB_LITE); mobidb-lite (MOBIDB_LITE); mobidb-lite (MOBIDB_LITE); mobidb-lite (MOBIDB_LITE); IPR040249 (PANTHER); PTHR31257:SF2 (PANTHER); IPR035992 (SUPERFAMILY)	no GO terms	no GO terms
[INTERPRO, BLASTED, ANNOTATED]	GFTW01078108.1	AT5G67480.3	1821	14	2.09639e-140	62.68	9	C:GO:0000123; F:GO:0003712; F:GO:0004402; F:GO:0005515; C:GO:0005667; P:GO:0006355; P:GO:0006355; F:GO:0008270; P:GO:0042967	C:histone acetyltransferase complex; F:transcription coregulator activity; F:histone acetyltransferase activity; F:protein binding; C:transcription factor complex; P:regulation of transcription, DNA-templated; P:regulation of transcription, DNA-templated; F:zinc ion binding; P:obsolete acyl-carrier-protein biosynthetic process			IPR000210 (SMART); IPR000197 (SMART); G3DSA:3.30.710.10 (GENE3D); G3DSA:1.25.40.420 (GENE3D); IPR000197 (PFAM); IPR000210 (PFAM); IPR035898 (G3DSA:1.20.1020.GENE3D); PTHR46287 (PANTHER); PTHR46287:SF11 (PANTHER); IPR000197 (PROSITE_PROFILES); IPR000210 (PROSITE_PROFILES); IPR034089 (CDD); IPR011333 (SUPERFAMILY); IPR035898 (SUPERFAMILY)	F:GO:0003712; F:GO:0004402; F:GO:0005515; C:GO:0005634; P:GO:0006355; F:GO:0008270	F:transcription coregulator activity; F:histone acetyltransferase activity; F:protein binding; C:nucleus; P:regulation of transcription, DNA-templated; F:zinc ion binding
[INTERPRO, BLASTED]	GFTW01078828.1	AT5G42900.1	385	3	2.31508e-09	96.3						mobidb-lite (MOBIDB_LITE); PTHR33676 (PANTHER); PTHR33676:SF3 (PANTHER)	no GO terms	no GO terms
[INTERPRO, BLASTED]	GFTW01078998.1	AT5G03720.1	2023	20	1.91741e-32	72.86						mobidb-lite (MOBIDB_LITE); PTHR10015:SF337 (PANTHER); IPR027725 (PANTHER)	no GO terms	no GO terms
[INTERPRO, BLASTED, ANNOTATED]	GFTW01079253.1	AT2G29670.2	816	11	7.34439e-80	65.37	1	F:GO:0005515	F:protein binding			IPR011990 (G3DSA:1.25.40.GENE3D); PTHR26312 (PANTHER); PTHR26312:SF139 (PANTHER); IPR013026 (PROSITE_PROFILES); IPR011990 (SUPERFAMILY)	F:GO:0005515	F:protein binding
[INTERPRO, BLASTED]	GFTW01080137.1	AT5G42900.3	652	5	1.5444e-14	50.74						PTHR33676 (PANTHER); PTHR33676:SF3 (PANTHER)	no GO terms	no GO terms
[INTERPRO, NO-BLAST]	GFTW01080158.1	---NA---	274									no IPS match	no IPS match	no IPS match
[INTERPRO, BLASTED, ANNOTATED]	GFTW01080365.1	AT1G67030.1	917	15	2.19464e-10	74.82	1	F:GO:0003676	F:nucleic acid binding			G3DSA:3.30.160.60 (GENE3D); mobidb-lite (MOBIDB_LITE); mobidb-lite (MOBIDB_LITE); PTHR46353 (PANTHER); PTHR46353:SF5 (PANTHER); IPR013087 (PROSITE_PROFILES); IPR036236 (SUPERFAMILY)	F:GO:0003676	F:nucleic acid binding
[INTERPRO, BLASTED]	GFTW01080366.1	AT1G68050.1	1179	7	2.3169e-15	77.67						G3DSA:3.30.450.20 (GENE3D); PTHR46175:SF2 (PANTHER); PTHR46175 (PANTHER); IPR000014 (PROSITE_PROFILES); IPR000014 (CDD); IPR035965 (SUPERFAMILY)	no GO terms	no GO terms
[INTERPRO, BLASTED]	GFTW01080367.1	AT1G68050.1	817	18	1.86854e-53	65.44						IPR000014 (PFAM); IPR000014 (TIGRFAM); G3DSA:3.30.450.20 (GENE3D); PTHR46175:SF2 (PANTHER); PTHR46175 (PANTHER); IPR000014 (PROSITE_PROFILES); IPR000014 (CDD); IPR035965 (SUPERFAMILY)	no GO terms	no GO terms
[INTERPRO, BLASTED, ANNOTATED]	GFTW01080373.1	AT4G36810.1	1439	20	3.21894e-165	73.57	1	P:GO:0008299	P:isoprenoid biosynthetic process			IPR000092 (PFAM); IPR008949 (G3DSA:1.10.600.GENE3D); PTHR43281:SF21 (PANTHER); PTHR43281 (PANTHER); cd00685 (CDD); IPR008949 (SUPERFAMILY)	P:GO:0008299	P:isoprenoid biosynthetic process
[INTERPRO, BLASTED, ANNOTATED]	GFTW01080573.1	AT5G63160.2	791	19	1.79763e-93	61.64	1	F:GO:0005515	F:protein binding			IPR000210 (SMART); IPR000210 (PFAM); G3DSA:3.30.710.10 (GENE3D); G3DSA:1.25.40.420 (GENE3D); PTHR46287 (PANTHER); PTHR46287:SF6 (PANTHER); IPR000210 (PROSITE_PROFILES); IPR034089 (CDD); IPR011333 (SUPERFAMILY)	F:GO:0005515	F:protein binding
[INTERPRO, BLASTED]	GFTW01081546.1	AT1G27461.1	1177	1	9.34667e-67	52.38						mobidb-lite (MOBIDB_LITE); mobidb-lite (MOBIDB_LITE); PTHR33595:SF3 (PANTHER); PTHR33595 (PANTHER)	no GO terms	no GO terms
[INTERPRO, BLASTED]	GFTW01082473.1	AT4G18593.1	780	2	1.04381e-57	82.68						PTHR45848 (PANTHER); PTHR45848:SF3 (PANTHER)	no GO terms	no GO terms
[INTERPRO, BLASTED, ANNOTATED]	GFTW01082838.1	AT1G66540.2	1575	20	1.16898e-97	60.23	4	F:GO:0005506; F:GO:0016705; F:GO:0020037; P:GO:0055114	F:iron ion binding; F:oxidoreductase activity, acting on paired donors, with incorporation or reduction of molecular oxygen; F:heme binding; P:oxidation-reduction process			IPR002401 (PRINTS); IPR001128 (PRINTS); IPR001128 (PFAM); IPR036396 (G3DSA:1.10.630.GENE3D); PTHR24281 (PANTHER); IPR036396 (SUPERFAMILY)	F:GO:0005506; F:GO:0016705; F:GO:0020037; P:GO:0055114	F:iron ion binding; F:oxidoreductase activity, acting on paired donors, with incorporation or reduction of molecular oxygen; F:heme binding; P:oxidation-reduction process
[INTERPRO, NO-BLAST]	GFTW01083564.1	---NA---	875									no IPS match	no IPS match	no IPS match
[INTERPRO, BLASTED, ANNOTATED]	GFTW01083679.1	AT4G17880.1	1390	20	1.0295e-93	58.42	1	F:GO:0046983	F:protein dimerization activity			IPR011598 (SMART); IPR036638 (G3DSA:4.10.280.GENE3D); IPR011598 (PFAM); mobidb-lite (MOBIDB_LITE); mobidb-lite (MOBIDB_LITE); PTHR11514:SF43 (PANTHER); PTHR11514 (PANTHER); IPR011598 (PROSITE_PROFILES); IPR011598 (CDD); IPR036638 (SUPERFAMILY)	F:GO:0046983	F:protein dimerization activity
[INTERPRO, NO-BLAST]	GFTW01083698.1	---NA---	493									no IPS match	no IPS match	no IPS match
[INTERPRO, NO-BLAST]	GFTW01083798.1	---NA---	809									no IPS match	no IPS match	no IPS match
[INTERPRO, BLASTED, ANNOTATED]	GFTW01084626.1	AT1G76490.1	885	2	1.79591e-09	84.85	5	F:GO:0004420; P:GO:0006694; P:GO:0015936; F:GO:0050662; P:GO:0055114	F:hydroxymethylglutaryl-CoA reductase (NADPH) activity; P:steroid biosynthetic process; P:coenzyme A metabolic process; F:coenzyme binding; P:oxidation-reduction process			IPR009023 (G3DSA:3.30.70.GENE3D); IPR002202 (PANTHER); PTHR10572:SF32 (PANTHER); IPR002202 (PROSITE_PROFILES); IPR009023 (SUPERFAMILY)	F:GO:0004420; P:GO:0015936; F:GO:0050662; P:GO:0055114	F:hydroxymethylglutaryl-CoA reductase (NADPH) activity; P:coenzyme A metabolic process; F:coenzyme binding; P:oxidation-reduction process
[INTERPRO, NO-BLAST]	GFTW01085056.1	---NA---	424									no IPS match	no IPS match	no IPS match
[INTERPRO, BLASTED, ANNOTATED]	GFTW01085885.1	AT3G15030.2	1287	20	1.72029e-45	74	3	F:GO:0003700; C:GO:0005667; P:GO:0006355	F:DNA-binding transcription factor activity; C:transcription factor complex; P:regulation of transcription, DNA-templated			IPR017887 (PFAM); IPR005333 (PANTHER); PTHR31072:SF95 (PANTHER); IPR017887 (PROSITE_PROFILES)	F:GO:0003700	F:DNA-binding transcription factor activity
[INTERPRO, BLASTED, ANNOTATED]	GFTW01086259.1	AT5G55190.1	967	4	1.24827e-33	89.15	3	F:GO:0003924; F:GO:0005525; P:GO:0006913	F:GTPase activity; F:GTP binding; P:nucleocytoplasmic transport			G3DSA:3.40.50.300 (GENE3D); mobidb-lite (MOBIDB_LITE); IPR002041 (PANTHER); PTHR24071:SF25 (PANTHER)	F:GO:0003924; F:GO:0005525; P:GO:0006913	F:GTPase activity; F:GTP binding; P:nucleocytoplasmic transport
[INTERPRO, BLASTED, ANNOTATED]	GFTW01086381.1	AT1G76490.1	1471	2	0	91.06	7	F:GO:0004420; P:GO:0006694; P:GO:0008299; P:GO:0015936; C:GO:0016021; F:GO:0050661; P:GO:0055114	F:hydroxymethylglutaryl-CoA reductase (NADPH) activity; P:steroid biosynthetic process; P:isoprenoid biosynthetic process; P:coenzyme A metabolic process; C:integral component of membrane; F:NADP binding; P:oxidation-reduction process			IPR002202 (PRINTS); IPR023282 (G3DSA:1.10.3270.GENE3D); IPR002202 (PFAM); IPR009023 (G3DSA:3.30.70.GENE3D); IPR004554 (TIGRFAM); IPR023074 (G3DSA:3.90.770.GENE3D); IPR002202 (PANTHER); PTHR10572:SF33 (PANTHER); IPR002202 (PROSITE_PROFILES); IPR004554 (CDD); IPR009023 (SUPERFAMILY); IPR009029 (SUPERFAMILY)	F:GO:0004420; P:GO:0008299; P:GO:0015936; C:GO:0016021; F:GO:0016616; F:GO:0050661; F:GO:0050662; P:GO:0055114	F:hydroxymethylglutaryl-CoA reductase (NADPH) activity; P:isoprenoid biosynthetic process; P:coenzyme A metabolic process; C:integral component of membrane; F:oxidoreductase activity, acting on the CH-OH group of donors, NAD or NADP as acceptor; F:NADP binding; F:coenzyme binding; P:oxidation-reduction process
[INTERPRO, BLASTED, ANNOTATED]	GFTW01086559.1	AT2G47890.1	1197	20	1.13145e-48	72.2	1	F:GO:0005515	F:protein binding			IPR010402 (PFAM); PTHR31717:SF58 (PANTHER); PTHR31717 (PANTHER); IPR010402 (PROSITE_PROFILES)	F:GO:0005515	F:protein binding
[INTERPRO, BLASTED]	GFTW01086911.1	AT2G36870.2	319	20	6.46052e-56	67.85						no IPS match	no IPS match	no IPS match
[INTERPRO, BLASTED, ANNOTATED]	GFTW01086916.1	AT2G36870.2	635	20	3.47775e-47	67.59	2	F:GO:0004553; P:GO:0005975	F:hydrolase activity, hydrolyzing O-glycosyl compounds; P:carbohydrate metabolic process			IPR000757 (PFAM); G3DSA:2.60.120.200 (GENE3D); PTHR31062:SF146 (PANTHER); PTHR31062 (PANTHER); IPR000757 (PROSITE_PROFILES); IPR013320 (SUPERFAMILY)	F:GO:0004553; P:GO:0005975	F:hydrolase activity, hydrolyzing O-glycosyl compounds; P:carbohydrate metabolic process
[INTERPRO, NO-BLAST, ANNOTATED]	GFTW01087564.1	---NA---	1643				1	F:GO:0003677	F:DNA binding			IPR003340 (SMART); IPR015300 (G3DSA:2.40.330.GENE3D); IPR015300 (G3DSA:2.40.330.GENE3D); IPR003340 (PFAM); mobidb-lite (MOBIDB_LITE); mobidb-lite (MOBIDB_LITE); mobidb-lite (MOBIDB_LITE); PTHR31920:SF52 (PANTHER); PTHR31920 (PANTHER); IPR003340 (PROSITE_PROFILES); IPR003340 (PROSITE_PROFILES); IPR003340 (CDD); IPR003340 (CDD); IPR015300 (SUPERFAMILY); IPR015300 (SUPERFAMILY)	F:GO:0003677	F:DNA binding
[INTERPRO, BLASTED, ANNOTATED]	GFTW01088601.1	AT2G21660.2	354	20	1.8408e-46	77.55	1	F:GO:0003676	F:nucleic acid binding			IPR000504 (SMART); IPR000504 (PFAM); IPR012677 (G3DSA:3.30.70.GENE3D); PTHR15241:SF78 (PANTHER); PTHR15241 (PANTHER); IPR000504 (PROSITE_PROFILES); IPR035979 (SUPERFAMILY)	F:GO:0003676	F:nucleic acid binding
[INTERPRO, BLASTED]	GFTW01088813.1	AT4G14720.1	1508	12	5.58674e-42	51.92						IPR010399 (SMART); IPR010399 (PFAM); IPR018467 (PFAM); mobidb-lite (MOBIDB_LITE); mobidb-lite (MOBIDB_LITE); mobidb-lite (MOBIDB_LITE); mobidb-lite (MOBIDB_LITE); mobidb-lite (MOBIDB_LITE); mobidb-lite (MOBIDB_LITE); IPR040390 (PANTHER); PTHR33077:SF60 (PANTHER); IPR010399 (PROSITE_PROFILES)	no GO terms	no GO terms
[INTERPRO, BLASTED]	GFTW01088956.1	AT1G22160.1	644	2	3.33915e-08	45.89						IPR007650 (PFAM); mobidb-lite (MOBIDB_LITE); PTHR33059:SF80 (PANTHER); PTHR33059 (PANTHER); IPR007650 (PROSITE_PROFILES)	no GO terms	no GO terms
[INTERPRO, BLASTED]	GFTW01088975.1	AT5G62770.1	891	1	1.20196e-06	45.39						IPR012442 (PFAM); mobidb-lite (MOBIDB_LITE); mobidb-lite (MOBIDB_LITE); mobidb-lite (MOBIDB_LITE); PTHR33095 (PANTHER); PTHR33095:SF46 (PANTHER)	no GO terms	no GO terms
[INTERPRO, BLASTED, ANNOTATED]	GFTW01089411.1	AT5G36110.1	1872	20	1.50261e-92	52.84	4	F:GO:0005506; F:GO:0016705; F:GO:0020037; P:GO:0055114	F:iron ion binding; F:oxidoreductase activity, acting on paired donors, with incorporation or reduction of molecular oxygen; F:heme binding; P:oxidation-reduction process			IPR001128 (PRINTS); IPR002401 (PRINTS); IPR036396 (G3DSA:1.10.630.GENE3D); IPR001128 (PFAM); PTHR24286:SF217 (PANTHER); PTHR24286 (PANTHER); IPR036396 (SUPERFAMILY)	F:GO:0005506; F:GO:0016705; F:GO:0020037; P:GO:0055114	F:iron ion binding; F:oxidoreductase activity, acting on paired donors, with incorporation or reduction of molecular oxygen; F:heme binding; P:oxidation-reduction process
[INTERPRO, NO-BLAST]	GFTW01089568.1	---NA---	332									no IPS match	no IPS match	no IPS match
[INTERPRO, NO-BLAST]	GFTW01089570.1	---NA---	381									no IPS match	no IPS match	no IPS match
[INTERPRO, BLASTED, ANNOTATED]	GFTW01090237.1	AT1G10350.1	1113	20	2.1341e-90	63.89	2	P:GO:0006457; F:GO:0051082	P:protein folding; F:unfolded protein binding			IPR002939 (PFAM); G3DSA:2.60.260.20 (GENE3D); G3DSA:2.60.260.20 (GENE3D); PTHR24078 (PANTHER); PTHR24078:SF534 (PANTHER); cd10747 (CDD); IPR008971 (SUPERFAMILY); IPR008971 (SUPERFAMILY)	P:GO:0006457; F:GO:0051082	P:protein folding; F:unfolded protein binding
[INTERPRO, BLASTED]	GFTW01090790.1	AT2G40070.3	1891	15	2.24672e-68	60.27						mobidb-lite (MOBIDB_LITE); mobidb-lite (MOBIDB_LITE); mobidb-lite (MOBIDB_LITE); mobidb-lite (MOBIDB_LITE); mobidb-lite (MOBIDB_LITE); mobidb-lite (MOBIDB_LITE); mobidb-lite (MOBIDB_LITE); mobidb-lite (MOBIDB_LITE); mobidb-lite (MOBIDB_LITE); PTHR31949:SF20 (PANTHER); PTHR31949 (PANTHER)	no GO terms	no GO terms
[INTERPRO, BLASTED, ANNOTATED]	GFTW01091339.1	AT2G29990.1	1837	11	0	60.38	2	F:GO:0016491; P:GO:0055114	F:oxidoreductase activity; P:oxidation-reduction process			PR00368 (PRINTS); IPR023753 (PFAM); G3DSA:3.50.50.100 (GENE3D); PTHR43706 (PANTHER); PTHR43706:SF4 (PANTHER); IPR036188 (SUPERFAMILY); IPR036188 (SUPERFAMILY)	F:GO:0016491; P:GO:0055114	F:oxidoreductase activity; P:oxidation-reduction process
[INTERPRO, BLASTED]	GFTW01092073.1	AT3G09100.2	1039	4	3.71279e-26	77.09						no IPS match	no IPS match	no IPS match
[INTERPRO, NO-BLAST]	GFTW01092075.1	---NA---	610									no IPS match	no IPS match	no IPS match
[INTERPRO, BLASTED, ANNOTATED]	GFTW01092101.1	AT3G52960.1	1104	8	1.6047e-83	70.76	2	F:GO:0016491; P:GO:0045454	F:oxidoreductase activity; P:cell redox homeostasis			G3DSA:3.40.30.10 (GENE3D); IPR013740 (PFAM); IPR037944 (PANTHER); PTHR10430:SF16 (PANTHER); IPR013766 (PROSITE_PROFILES); IPR037944 (CDD); IPR036249 (SUPERFAMILY)	F:GO:0016491; P:GO:0045454	F:oxidoreductase activity; P:cell redox homeostasis
[INTERPRO, BLASTED, ANNOTATED]	GFTW01092159.1	AT2G46660.1	2062	20	0	59.92	4	F:GO:0005506; F:GO:0016705; F:GO:0020037; P:GO:0055114	F:iron ion binding; F:oxidoreductase activity, acting on paired donors, with incorporation or reduction of molecular oxygen; F:heme binding; P:oxidation-reduction process			IPR002401 (PRINTS); IPR001128 (PRINTS); IPR036396 (G3DSA:1.10.630.GENE3D); IPR001128 (PFAM); PTHR24281 (PANTHER); IPR036396 (SUPERFAMILY)	F:GO:0005506; F:GO:0016705; F:GO:0020037; P:GO:0055114	F:iron ion binding; F:oxidoreductase activity, acting on paired donors, with incorporation or reduction of molecular oxygen; F:heme binding; P:oxidation-reduction process
[INTERPRO, BLASTED]	GFTW01093381.1	AT2G33850.1	1031	3	7.80817e-06	82.72						mobidb-lite (MOBIDB_LITE); mobidb-lite (MOBIDB_LITE); mobidb-lite (MOBIDB_LITE); PTHR35274:SF2 (PANTHER); IPR040290 (PANTHER)	no GO terms	no GO terms
[INTERPRO, BLASTED, ANNOTATED]	GFTW01093426.1	AT4G37760.1	969	12	1.63347e-128	76.21	6	F:GO:0004506; C:GO:0016021; P:GO:0016114; P:GO:0016126; F:GO:0050660; P:GO:0055114	F:squalene monooxygenase activity; C:integral component of membrane; P:terpenoid biosynthetic process; P:sterol biosynthetic process; F:flavin adenine dinucleotide binding; P:oxidation-reduction process			PR00420 (PRINTS); IPR036188 (G3DSA:3.50.50.GENE3D); IPR013698 (PFAM); PF13450 (PFAM); PTHR10835:SF4 (PANTHER); IPR040125 (PANTHER); IPR036188 (SUPERFAMILY)	F:GO:0004506; C:GO:0016021; P:GO:0016126; F:GO:0050660; P:GO:0055114	F:squalene monooxygenase activity; C:integral component of membrane; P:sterol biosynthetic process; F:flavin adenine dinucleotide binding; P:oxidation-reduction process
[INTERPRO, BLASTED, ANNOTATED]	GFTW01094631.1	AT2G42690.1	1050	17	3.40067e-81	52.35	3	F:GO:0008970; P:GO:0009395; P:GO:0046486	F:phospholipase A1 activity; P:phospholipid catabolic process; P:glycerolipid metabolic process			G3DSA:3.40.50.12520 (GENE3D); IPR002921 (PFAM); mobidb-lite (MOBIDB_LITE); mobidb-lite (MOBIDB_LITE); PTHR31828:SF10 (PANTHER); IPR033556 (PANTHER); cd00519 (CDD); IPR029058 (SUPERFAMILY)	P:GO:0006629; F:GO:0008970	P:lipid metabolic process; F:phospholipase A1 activity
[INTERPRO, BLASTED, ANNOTATED]	GFTW01094632.1	AT2G42690.1	501	9	3.13722e-41	62.08	3	F:GO:0008970; P:GO:0009395; P:GO:0046486	F:phospholipase A1 activity; P:phospholipid catabolic process; P:glycerolipid metabolic process			G3DSA:3.40.50.12520 (GENE3D); PTHR31828:SF17 (PANTHER); IPR033556 (PANTHER)	F:GO:0008970	F:phospholipase A1 activity
[INTERPRO, BLASTED, ANNOTATED]	GFTW01095273.1	AT5G07050.1	543	20	6.52695e-76	72.21	2	C:GO:0016021; F:GO:0022857	C:integral component of membrane; F:transmembrane transporter activity			IPR000620 (PFAM); PTHR31218:SF257 (PANTHER); IPR030184 (PANTHER); SSF103481 (SUPERFAMILY)	C:GO:0016020; C:GO:0016021; F:GO:0022857	C:membrane; C:integral component of membrane; F:transmembrane transporter activity
[INTERPRO, BLASTED, ANNOTATED]	GFTW01095930.1	AT1G62660.3	939	20	3.75307e-83	58.41	2	F:GO:0004553; P:GO:0005975	F:hydrolase activity, hydrolyzing O-glycosyl compounds; P:carbohydrate metabolic process			IPR001362 (SMART); IPR013189 (PFAM); G3DSA:2.60.120.560 (GENE3D); PTHR31953 (PANTHER); PTHR31953:SF34 (PANTHER); IPR013320 (SUPERFAMILY)	F:GO:0004553; P:GO:0005975	F:hydrolase activity, hydrolyzing O-glycosyl compounds; P:carbohydrate metabolic process
[INTERPRO, BLASTED]	GFTW01096004.1	AT5G59720.1	462	16	6.39046e-63	70.57						IPR008978 (G3DSA:2.60.40.GENE3D); IPR002068 (PFAM); IPR031107 (PANTHER); PTHR11527:SF303 (PANTHER); IPR002068 (PROSITE_PROFILES); cd06472 (CDD); IPR008978 (SUPERFAMILY)	no GO terms	no GO terms
[INTERPRO, BLASTED]	GFTW01096462.1	AT3G60260.1	837	20	5.77938e-107	76.77						IPR006816 (PFAM); PTHR12771 (PANTHER); PTHR12771:SF53 (PANTHER); IPR006816 (PROSITE_PROFILES)	no GO terms	no GO terms
[INTERPRO, BLASTED]	GFTW01096464.1	AT3G60260.1	995	20	7.26543e-92	77.04						IPR006816 (PFAM); PTHR12771 (PANTHER); PTHR12771:SF53 (PANTHER); IPR006816 (PROSITE_PROFILES)	no GO terms	no GO terms
[INTERPRO, NO-BLAST]	GFTW01097398.1	---NA---	2131									no IPS match	no IPS match	no IPS match
[INTERPRO, BLASTED]	GFTW01098093.1	AT5G10750.1	1453	17	1.47567e-124	63.36						IPR009769 (PFAM); PTHR12136 (PANTHER); PTHR12136:SF98 (PANTHER)	no GO terms	no GO terms
[INTERPRO, NO-BLAST]	GFTW01098160.1	---NA---	502									no IPS match	no IPS match	no IPS match
[INTERPRO, BLASTED]	GFTW01098842.1	AT4G13250.1	1348	20	0	49.96						IPR002347 (PRINTS); IPR002347 (PFAM); G3DSA:3.40.50.720 (GENE3D); PTHR24314 (PANTHER); PTHR24314:SF21 (PANTHER); cd05233 (CDD); IPR036291 (SUPERFAMILY)	no GO terms	no GO terms
[INTERPRO, BLASTED]	GFTW01099280.1	AT3G24255.4	2452	8	1.02666e-20	50.2						IPR000477 (PFAM); IPR026960 (PFAM); PTHR33116 (PANTHER); PTHR33116:SF30 (PANTHER); IPR000477 (PROSITE_PROFILES); cd01650 (CDD); SSF56672 (SUPERFAMILY)	no GO terms	no GO terms
[INTERPRO, NO-BLAST]	GFTW01100128.1	---NA---	815									no IPS match	no IPS match	no IPS match
[INTERPRO, NO-BLAST]	GFTW01100756.1	---NA---	1458									no IPS match	no IPS match	no IPS match
[INTERPRO, BLASTED]	GFTW01101262.1	AT3G32940.1	329	1	1.20267e-06	76.47						PTHR11208 (PANTHER); PTHR11208:SF98 (PANTHER)	no GO terms	no GO terms
[INTERPRO, BLASTED]	GFTW01103252.1	AT1G73950.2	349	8	4.91316e-52	80.6						IPR019396 (PFAM); PTHR46859 (PANTHER); PTHR46859:SF3 (PANTHER)	no GO terms	no GO terms
[INTERPRO, BLASTED, ANNOTATED]	GFTW01103607.1	AT2G42690.1	1567	20	6.25781e-167	53.82	3	F:GO:0008970; P:GO:0009395; P:GO:0046486	F:phospholipase A1 activity; P:phospholipid catabolic process; P:glycerolipid metabolic process			IPR002921 (PFAM); G3DSA:3.40.50.12520 (GENE3D); mobidb-lite (MOBIDB_LITE); mobidb-lite (MOBIDB_LITE); IPR033556 (PANTHER); PTHR31828:SF10 (PANTHER); cd00519 (CDD); IPR029058 (SUPERFAMILY)	P:GO:0006629; F:GO:0008970	P:lipid metabolic process; F:phospholipase A1 activity
[INTERPRO, BLASTED, ANNOTATED]	GFTW01103874.1	AT5G55470.1	2853	19	2.59073e-158	67.48	8	C:GO:0005774; P:GO:0006814; P:GO:0006885; P:GO:0009651; F:GO:0015385; C:GO:0016021; P:GO:0055075; P:GO:1902600	C:vacuolar membrane; P:sodium ion transport; P:regulation of pH; P:response to salt stress; F:sodium:proton antiporter activity; C:integral component of membrane; P:potassium ion homeostasis; P:proton transmembrane transport			IPR004709 (PRINTS); IPR038770 (G3DSA:1.20.1530.GENE3D); IPR006153 (PFAM); IPR018422 (PANTHER); IPR036958 (PTHR10110:PANTHER)	C:GO:0005774; P:GO:0006812; P:GO:0006814; P:GO:0006885; P:GO:0009651; F:GO:0015299; F:GO:0015385; C:GO:0016021; P:GO:0055075; P:GO:0055085	C:vacuolar membrane; P:cation transport; P:sodium ion transport; P:regulation of pH; P:response to salt stress; F:solute:proton antiporter activity; F:sodium:proton antiporter activity; C:integral component of membrane; P:potassium ion homeostasis; P:transmembrane transport
[INTERPRO, NO-BLAST]	GFTW01104441.1	---NA---	588									no IPS match	no IPS match	no IPS match
[INTERPRO, BLASTED]	GFTW01104791.1	AT1G10000.1	645	1	6.21477e-05	39.07						PTHR47746 (PANTHER); PTHR47746:SF11 (PANTHER)	no GO terms	no GO terms
[INTERPRO, BLASTED]	GFTW01104809.1	AT5G58490.1	2924	2	5.92255e-14	80.94						no IPS match	no IPS match	no IPS match
[INTERPRO, BLASTED]	GFTW01106004.1	AT1G22750.3	446	4	2.55775e-07	49.57						IPR009943 (PFAM); IPR009943 (PANTHER)	no GO terms	no GO terms
[INTERPRO, NO-BLAST]	GFTW01106051.1	---NA---	614									no IPS match	no IPS match	no IPS match
[INTERPRO, BLASTED, ANNOTATED]	GFTW01106054.1	AT5G48250.1	1411	20	1.43828e-108	62.92	2	F:GO:0005515; F:GO:0008270	F:protein binding; F:zinc ion binding			IPR000315 (SMART); IPR010402 (PFAM); IPR000315 (PFAM); PTHR31717:SF62 (PANTHER); PTHR31717 (PANTHER); IPR000315 (PROSITE_PROFILES); IPR010402 (PROSITE_PROFILES); IPR000315 (PROSITE_PROFILES); IPR000315 (CDD); IPR000315 (CDD)	F:GO:0005515; F:GO:0008270	F:protein binding; F:zinc ion binding
[INTERPRO, BLASTED, ANNOTATED]	GFTW01106055.1	AT5G48250.1	1902	20	5.27192e-105	61.65	2	F:GO:0005515; F:GO:0008270	F:protein binding; F:zinc ion binding			IPR000315 (SMART); IPR000315 (PFAM); IPR010402 (PFAM); PTHR31717 (PANTHER); PTHR31717:SF50 (PANTHER); IPR000315 (PROSITE_PROFILES); IPR000315 (PROSITE_PROFILES); IPR010402 (PROSITE_PROFILES); IPR000315 (CDD); IPR000315 (CDD)	F:GO:0005515; F:GO:0008270	F:protein binding; F:zinc ion binding
[INTERPRO, BLASTED, MAPPED, ANNOTATED]	GFTW01106073.1	AT1G55850.1	369	18	1.27018e-09	56.18	6	P:GO:0005982; P:GO:0005985; P:GO:0006011; C:GO:0016020; F:GO:0016760; P:GO:0030244	P:starch metabolic process; P:sucrose metabolic process; P:UDP-glucose metabolic process; C:membrane; F:cellulose synthase (UDP-forming) activity; P:cellulose biosynthetic process			IPR029044 (G3DSA:3.90.550.GENE3D); IPR005150 (PFAM); PTHR13301 (PANTHER); PTHR13301:SF170 (PANTHER)	C:GO:0016020; F:GO:0016760; P:GO:0030244	C:membrane; F:cellulose synthase (UDP-forming) activity; P:cellulose biosynthetic process
[INTERPRO, BLASTED, MAPPED, ANNOTATED]	GFTW01106074.1	AT4G24000.2	1322	20	3.00455e-73	51.97	6	P:GO:0005982; P:GO:0005985; P:GO:0006011; C:GO:0016020; F:GO:0016760; P:GO:0030244	P:starch metabolic process; P:sucrose metabolic process; P:UDP-glucose metabolic process; C:membrane; F:cellulose synthase (UDP-forming) activity; P:cellulose biosynthetic process			IPR005150 (PFAM); PTHR13301 (PANTHER); PTHR13301:SF170 (PANTHER)	C:GO:0016020; F:GO:0016760; P:GO:0030244	C:membrane; F:cellulose synthase (UDP-forming) activity; P:cellulose biosynthetic process
[INTERPRO, BLASTED, MAPPED, ANNOTATED]	GFTW01106075.1	AT4G24010.1	1142	20	1.64246e-82	54.02	6	P:GO:0005982; P:GO:0005985; P:GO:0006011; C:GO:0016020; F:GO:0016760; P:GO:0030244	P:starch metabolic process; P:sucrose metabolic process; P:UDP-glucose metabolic process; C:membrane; F:cellulose synthase (UDP-forming) activity; P:cellulose biosynthetic process			IPR005150 (PFAM); IPR029044 (G3DSA:3.90.550.GENE3D); PTHR13301:SF170 (PANTHER); PTHR13301 (PANTHER); IPR029044 (SUPERFAMILY)	C:GO:0016020; F:GO:0016760; P:GO:0030244	C:membrane; F:cellulose synthase (UDP-forming) activity; P:cellulose biosynthetic process
[INTERPRO, BLASTED, ANNOTATED]	GFTW01108088.1	AT3G14440.1	1971	9	0	66.56	2	F:GO:0016702; P:GO:0055114	F:oxidoreductase activity, acting on single donors with incorporation of molecular oxygen, incorporation of two atoms of oxygen; P:oxidation-reduction process			IPR004294 (PFAM); mobidb-lite (MOBIDB_LITE); mobidb-lite (MOBIDB_LITE); mobidb-lite (MOBIDB_LITE); PTHR10543:SF104 (PANTHER); IPR004294 (PANTHER)	F:GO:0016702; P:GO:0055114	F:oxidoreductase activity, acting on single donors with incorporation of molecular oxygen, incorporation of two atoms of oxygen; P:oxidation-reduction process
[INTERPRO, BLASTED, ANNOTATED]	GFTW01108129.1	AT1G14360.1	1557	9	0	55.92	1	P:GO:0055085	P:transmembrane transport			IPR013657 (PFAM); PTHR10778 (PANTHER); PTHR10778:SF38 (PANTHER); SSF103481 (SUPERFAMILY)	P:GO:0055085	P:transmembrane transport
[INTERPRO, NO-BLAST]	GFTW01108836.1	---NA---	402									no IPS match	no IPS match	no IPS match
[INTERPRO, BLASTED, ANNOTATED]	GFTW01109088.1	AT1G78360.1	1240	20	6.10423e-39	73.55	1	F:GO:0005515	F:protein binding			G3DSA:3.40.30.10 (GENE3D); IPR004045 (PFAM); G3DSA:1.20.1050.10 (GENE3D),SFLDS00019 (SFLD),SFLDG00358 (SFLD); IPR040079 (PTHR11260:PANTHER); PTHR11260 (PANTHER); IPR004045 (PROSITE_PROFILES); cd03058 (CDD); IPR036249 (SUPERFAMILY)	F:GO:0005515	F:protein binding
[INTERPRO, NO-BLAST]	GFTW01109157.1	---NA---	1117									mobidb-lite (MOBIDB_LITE); mobidb-lite (MOBIDB_LITE)	no GO terms	no GO terms
[INTERPRO, NO-BLAST]	GFTW01109898.1	---NA---	389									mobidb-lite (MOBIDB_LITE)	no GO terms	no GO terms
[INTERPRO, BLASTED, ANNOTATED]	GFTW01110151.1	AT5G25120.1	2546	20	2.68295e-57	69.27	4	F:GO:0005506; F:GO:0016705; F:GO:0020037; P:GO:0055114	F:iron ion binding; F:oxidoreductase activity, acting on paired donors, with incorporation or reduction of molecular oxygen; F:heme binding; P:oxidation-reduction process			IPR001128 (PRINTS); IPR002401 (PRINTS); IPR001128 (PFAM); IPR036396 (G3DSA:1.10.630.GENE3D); PTHR24281 (PANTHER); IPR036396 (SUPERFAMILY)	F:GO:0005506; F:GO:0016705; F:GO:0020037; P:GO:0055114	F:iron ion binding; F:oxidoreductase activity, acting on paired donors, with incorporation or reduction of molecular oxygen; F:heme binding; P:oxidation-reduction process
[INTERPRO, BLASTED, ANNOTATED]	GFTW01110152.1	AT3G48310.1	2932	20	2.02676e-112	63.64	4	F:GO:0005506; F:GO:0016705; F:GO:0020037; P:GO:0055114	F:iron ion binding; F:oxidoreductase activity, acting on paired donors, with incorporation or reduction of molecular oxygen; F:heme binding; P:oxidation-reduction process			IPR002401 (PRINTS); IPR001128 (PRINTS); IPR036396 (G3DSA:1.10.630.GENE3D); IPR001128 (PFAM); PTHR24303 (PANTHER); IPR036396 (SUPERFAMILY)	F:GO:0005506; F:GO:0016705; F:GO:0020037; P:GO:0055114	F:iron ion binding; F:oxidoreductase activity, acting on paired donors, with incorporation or reduction of molecular oxygen; F:heme binding; P:oxidation-reduction process
[INTERPRO, BLASTED, ANNOTATED]	GFTW01110338.1	AT3G20240.1	942	20	3.63899e-97	47.37	2	F:GO:0022857; P:GO:0055085	F:transmembrane transporter activity; P:transmembrane transport			IPR002067 (PRINTS); IPR018108 (PFAM); IPR023395 (G3DSA:1.50.40.GENE3D); PTHR24089 (PANTHER); PTHR24089:SF681 (PANTHER); IPR018108 (PROSITE_PROFILES); IPR018108 (PROSITE_PROFILES); IPR023395 (SUPERFAMILY)	F:GO:0022857; P:GO:0055085	F:transmembrane transporter activity; P:transmembrane transport
[INTERPRO, BLASTED, ANNOTATED]	GFTW01110339.1	AT3G20240.1	1071	20	1.80483e-104	52.73	2	F:GO:0022857; P:GO:0055085	F:transmembrane transporter activity; P:transmembrane transport			IPR002067 (PRINTS); IPR018108 (PFAM); IPR023395 (G3DSA:1.50.40.GENE3D); PTHR24089:SF631 (PANTHER); PTHR24089 (PANTHER); IPR018108 (PROSITE_PROFILES); IPR018108 (PROSITE_PROFILES); IPR023395 (SUPERFAMILY)	F:GO:0022857; P:GO:0055085	F:transmembrane transporter activity; P:transmembrane transport
[INTERPRO, BLASTED, ANNOTATED]	GFTW01110519.1	AT2G46210.1	1085	14	9.16288e-166	58.98	3	P:GO:0006629; C:GO:0016021; F:GO:0016491	P:lipid metabolic process; C:integral component of membrane; F:oxidoreductase activity			IPR001199 (SMART); IPR012171 (PIRSF); IPR036400 (G3DSA:3.10.120.GENE3D); IPR001199 (PFAM); IPR005804 (PFAM); PTHR19353:SF28 (PANTHER); PTHR19353 (PANTHER); IPR001199 (PROSITE_PROFILES); cd03506 (CDD); IPR036400 (SUPERFAMILY)	P:GO:0006629; C:GO:0016021; F:GO:0016491	P:lipid metabolic process; C:integral component of membrane; F:oxidoreductase activity
[INTERPRO, BLASTED]	GFTW01110893.1	AT4G39880.1	3206	1	1.57986e-07	78.38						mobidb-lite (MOBIDB_LITE); mobidb-lite (MOBIDB_LITE); mobidb-lite (MOBIDB_LITE)	no GO terms	no GO terms
[INTERPRO, BLASTED]	GFTW01112719.1	AT4G39210.1	457	10	7.31353e-06	92.62						no IPS match	no IPS match	no IPS match
[INTERPRO, BLASTED]	GFTW01113401.1	AT5G19010.1	2076	20	1.87968e-31	66.57						no IPS match	no IPS match	no IPS match
[INTERPRO, BLASTED, ANNOTATED]	GFTW01113559.1	AT3G52180.1	866	13	1.26957e-123	66.71	5	P:GO:0005982; P:GO:0006470; P:GO:0007623; F:GO:0008138; F:GO:0019203	P:starch metabolic process; P:protein dephosphorylation; P:circadian rhythm; F:protein tyrosine/serine/threonine phosphatase activity; F:carbohydrate phosphatase activity			IPR020422 (SMART); IPR029021 (G3DSA:3.90.190.GENE3D); IPR013783 (G3DSA:2.60.40.GENE3D); IPR032640 (PFAM); IPR000340 (PFAM); PTHR46642 (PANTHER); IPR030079 (PTHR46642:PANTHER); IPR000387 (PROSITE_PROFILES); IPR020422 (PROSITE_PROFILES); cd02859 (CDD); IPR014756 (SUPERFAMILY); IPR029021 (SUPERFAMILY)	P:GO:0005982; P:GO:0006470; P:GO:0007623; F:GO:0008138; P:GO:0016311; F:GO:0016791; F:GO:0019203	P:starch metabolic process; P:protein dephosphorylation; P:circadian rhythm; F:protein tyrosine/serine/threonine phosphatase activity; P:dephosphorylation; F:phosphatase activity; F:carbohydrate phosphatase activity
[INTERPRO, NO-BLAST]	GFTW01113597.1	---NA---	1230									mobidb-lite (MOBIDB_LITE); mobidb-lite (MOBIDB_LITE)	no GO terms	no GO terms
[INTERPRO, NO-BLAST]	GFTW01114118.1	---NA---	1664									no IPS match	no IPS match	no IPS match
[INTERPRO, BLASTED]	GFTW01114174.1	AT3G11780.1	934	4	1.56962e-29	68.29						PTHR11306:SF38 (PANTHER); IPR039670 (PANTHER)	no GO terms	no GO terms
[INTERPRO, BLASTED]	GFTW01114175.1	AT3G11780.1	482	5	1.28522e-38	62.4						IPR003172 (SMART); IPR003172 (PFAM); IPR039670 (PANTHER); PTHR11306:SF34 (PANTHER); IPR014756 (SUPERFAMILY)	no GO terms	no GO terms
[INTERPRO, NO-BLAST]	GFTW01114253.1	---NA---	991									no IPS match	no IPS match	no IPS match
[INTERPRO, BLASTED, ANNOTATED]	GFTW01114822.1	AT1G53120.1	501	2	2.08473e-34	92.53	1	F:GO:0003723	F:RNA binding			IPR002942 (SMART); IPR002942 (PFAM); IPR036986 (G3DSA:3.10.290.GENE3D); PTHR32219:SF3 (PANTHER); PTHR32219 (PANTHER); IPR002942 (PROSITE_PROFILES); IPR002942 (CDD); SSF55174 (SUPERFAMILY)	F:GO:0003723	F:RNA binding
[INTERPRO, BLASTED, ANNOTATED]	GFTW01115913.1	AT5G13240.1	430	3	8.42869e-70	81.37	1	P:GO:0016480	P:negative regulation of transcription by RNA polymerase III			IPR015257 (PIRSF); IPR038564 (G3DSA:3.40.1000.GENE3D); IPR015257 (PFAM); PTHR22504:SF0 (PANTHER); IPR015257 (PANTHER)	P:GO:0016480	P:negative regulation of transcription by RNA polymerase III
[INTERPRO, NO-BLAST]	GFTW01116336.1	---NA---	987									no IPS match	no IPS match	no IPS match
[INTERPRO, BLASTED, ANNOTATED]	GFTW01116667.1	AT4G31290.1	1879	4	5.1758e-107	80.37	2	F:GO:0003839; P:GO:0006751	F:gamma-glutamylcyclotransferase activity; P:glutathione catabolic process			G3DSA:3.10.490.10 (GENE3D); IPR006840 (PFAM); mobidb-lite (MOBIDB_LITE); IPR006840 (PANTHER); PTHR12192:SF19 (PANTHER); IPR013024 (CDD); IPR036568 (SUPERFAMILY)	F:GO:0003839; P:GO:0006751	F:gamma-glutamylcyclotransferase activity; P:glutathione catabolic process
[INTERPRO, NO-BLAST]	GFTW01116782.1	---NA---	858									no IPS match	no IPS match	no IPS match
[INTERPRO, BLASTED, ANNOTATED]	GFTW01116789.1	AT5G16440.1	867	3	6.67913e-81	93.04	4	F:GO:0004452; P:GO:0006694; P:GO:0016114; F:GO:0016787	F:isopentenyl-diphosphate delta-isomerase activity; P:steroid biosynthetic process; P:terpenoid biosynthetic process; F:hydrolase activity			IPR011876 (TIGRFAM); G3DSA:3.90.79.10 (GENE3D); IPR000086 (PFAM); IPR011876 (PIRSF); PTHR10885 (PANTHER); PTHR10885:SF6 (PANTHER); IPR000086 (PROSITE_PROFILES); IPR015797 (SUPERFAMILY)	F:GO:0004452; P:GO:0008299; F:GO:0016787	F:isopentenyl-diphosphate delta-isomerase activity; P:isoprenoid biosynthetic process; F:hydrolase activity
[INTERPRO, BLASTED, ANNOTATED]	GFTW01118247.1	AT5G57190.1	2014	5	0	67.3	7	F:GO:0004609; F:GO:0005509; P:GO:0006544; P:GO:0006563; P:GO:0006566; P:GO:0008654; P:GO:0046486	F:phosphatidylserine decarboxylase activity; F:calcium ion binding; P:glycine metabolic process; P:L-serine metabolic process; P:threonine metabolic process; P:phospholipid biosynthetic process; P:glycerolipid metabolic process			IPR002048 (SMART); IPR003817 (PFAM); G3DSA:1.10.238.10 (GENE3D); IPR002048 (PFAM); IPR033177 (TIGRFAM); PTHR10067:SF2 (PANTHER); IPR003817 (PANTHER); IPR033179 (HAMAP); IPR002048 (PROSITE_PROFILES); IPR002048 (PROSITE_PROFILES); IPR002048 (CDD); IPR011992 (SUPERFAMILY)	F:GO:0004609; F:GO:0005509; P:GO:0008654	F:phosphatidylserine decarboxylase activity; F:calcium ion binding; P:phospholipid biosynthetic process
[INTERPRO, BLASTED]	GFTW01118803.1	AT5G14720.1	639	2	1.18439e-09	67.8						no IPS match	no IPS match	no IPS match
[INTERPRO, BLASTED]	GFTW01118806.1	AT5G14720.1	1374	20	1.36169e-100	66.24						mobidb-lite (MOBIDB_LITE); mobidb-lite (MOBIDB_LITE); mobidb-lite (MOBIDB_LITE); mobidb-lite (MOBIDB_LITE); mobidb-lite (MOBIDB_LITE); PTHR24361:SF733 (PANTHER); PTHR24361 (PANTHER)	no GO terms	no GO terms
[INTERPRO, NO-BLAST]	GFTW01120397.1	---NA---	1746									no IPS match	no IPS match	no IPS match
[INTERPRO, NO-BLAST]	GFTW01120651.1	---NA---	748									PTHR33526:SF4 (PANTHER); PTHR33526 (PANTHER)	no GO terms	no GO terms
[INTERPRO, BLASTED]	GFTW01120972.1	AT5G36930.1	1286	20	2.06917e-16	44						IPR032675 (G3DSA:3.80.10.GENE3D); IPR032675 (G3DSA:3.80.10.GENE3D); PTHR11017 (PANTHER); PTHR11017:SF267 (PANTHER); SSF52058 (SUPERFAMILY)	no GO terms	no GO terms
[INTERPRO, BLASTED, ANNOTATED]	GFTW01121183.1	AT3G02040.1	1519	5	4.74659e-145	71.95	2	P:GO:0006629; F:GO:0008081	P:lipid metabolic process; F:phosphoric diester hydrolase activity			IPR017946 (G3DSA:3.20.20.GENE3D); IPR030395 (PFAM); PTHR22958:SF30 (PANTHER); PTHR22958 (PANTHER); IPR030395 (PROSITE_PROFILES); IPR017946 (SUPERFAMILY)	P:GO:0006629; F:GO:0008081	P:lipid metabolic process; F:phosphoric diester hydrolase activity
[INTERPRO, BLASTED, ANNOTATED]	GFTW01122169.1	AT5G55190.1	360	4	2.69033e-22	98.72	3	F:GO:0003924; F:GO:0005525; P:GO:0006913	F:GTPase activity; F:GTP binding; P:nucleocytoplasmic transport			IPR001806 (PFAM); G3DSA:3.40.50.300 (GENE3D); PTHR24071:SF19 (PANTHER); IPR002041 (PANTHER); IPR027417 (SUPERFAMILY)	F:GO:0003924; F:GO:0005525; P:GO:0006913	F:GTPase activity; F:GTP binding; P:nucleocytoplasmic transport
[INTERPRO, BLASTED, ANNOTATED]	GFTW01122170.1	AT5G55190.1	232	4	2.71633e-23	98.72	3	F:GO:0003924; F:GO:0005525; P:GO:0006913	F:GTPase activity; F:GTP binding; P:nucleocytoplasmic transport			G3DSA:3.40.50.300 (GENE3D); IPR001806 (PFAM); IPR002041 (PANTHER); PTHR24071:SF19 (PANTHER); IPR027417 (SUPERFAMILY)	F:GO:0003924; F:GO:0005525; P:GO:0006913	F:GTPase activity; F:GTP binding; P:nucleocytoplasmic transport
[INTERPRO, BLASTED, ANNOTATED]	GFTW01123729.1	AT2G29950.1	906	6	2.01661e-18	70.76	1	P:GO:0042753	P:positive regulation of circadian rhythm			IPR009741 (PFAM); mobidb-lite (MOBIDB_LITE); PTHR33469:SF1 (PANTHER); IPR040462 (PANTHER)	P:GO:0042753	P:positive regulation of circadian rhythm
[INTERPRO, NO-BLAST]	GFTW01124195.1	---NA---	685									mobidb-lite (MOBIDB_LITE)	no GO terms	no GO terms
[INTERPRO, BLASTED, ANNOTATED]	GFTW01124517.1	AT1G68050.1	458	5	2.39056e-75	84.89	1	F:GO:0005515	F:protein binding			IPR015915 (G3DSA:2.120.10.GENE3D); IPR011498 (PFAM); PTHR46175 (PANTHER); PTHR46175:SF2 (PANTHER); IPR015915 (SUPERFAMILY)	F:GO:0005515	F:protein binding
[INTERPRO, BLASTED, ANNOTATED]	GFTW01124948.1	AT1G34190.1	1470	20	2.20343e-10	48.88	2	F:GO:0003677; P:GO:0006355	F:DNA binding; P:regulation of transcription, DNA-templated			IPR003441 (PFAM); IPR036093 (G3DSA:3.30.310.GENE3D); mobidb-lite (MOBIDB_LITE); mobidb-lite (MOBIDB_LITE); mobidb-lite (MOBIDB_LITE); PTHR31989:SF62 (PANTHER); PTHR31989 (PANTHER); IPR003441 (PROSITE_PROFILES); IPR036093 (SUPERFAMILY)	F:GO:0003677; P:GO:0006355	F:DNA binding; P:regulation of transcription, DNA-templated
[INTERPRO, NO-BLAST]	GFTW01125073.1	---NA---	310									no IPS match	no IPS match	no IPS match
[INTERPRO, BLASTED, ANNOTATED]	GFTW01125202.1	AT5G61380.1	1456	13	7.89045e-23	79.17	1	F:GO:0005515	F:protein binding			IPR010402 (PFAM); mobidb-lite (MOBIDB_LITE); mobidb-lite (MOBIDB_LITE); PTHR43874 (PANTHER); PTHR43874:SF1 (PANTHER); IPR010402 (PROSITE_PROFILES)	F:GO:0005515	F:protein binding
[INTERPRO, BLASTED]	GFTW01127972.1	AT4G33980.1	1019	5	5.39232e-06	70.52						PTHR33676:SF17 (PANTHER); PTHR33676 (PANTHER)	no GO terms	no GO terms
[INTERPRO, NO-BLAST]	GFTW01129655.1	---NA---	1175									no IPS match	no IPS match	no IPS match
[INTERPRO, BLASTED]	GFTW01130359.1	AT1G22750.2	939	4	3.25996e-33	53.34						IPR009943 (PFAM); IPR009943 (PANTHER)	no GO terms	no GO terms
[INTERPRO, NO-BLAST]	GFTW01130365.1	---NA---	982									no IPS match	no IPS match	no IPS match
[INTERPRO, BLASTED, ANNOTATED]	GFTW01130874.1	AT1G04290.1	1357	5	8.16348e-51	59.51	1	F:GO:0047617	F:acyl-CoA hydrolase activity			G3DSA:3.10.129.10 (GENE3D); IPR006683 (PFAM); IPR003736 (TIGRFAM); PTHR21660:SF1 (PANTHER); IPR039298 (PANTHER); cd03443 (CDD); IPR029069 (SUPERFAMILY)	F:GO:0047617	F:acyl-CoA hydrolase activity
[INTERPRO, NO-BLAST]	GFTW01130921.1	---NA---	1243									PTHR33676:SF15 (PANTHER); PTHR33676 (PANTHER)	no GO terms	no GO terms
[INTERPRO, BLASTED, ANNOTATED]	GFTW01130938.1	AT1G08800.2	2793	20	3.39452e-36	67.51	2	C:GO:0016459; F:GO:0017022	C:myosin complex; F:myosin binding			IPR025592 (PFAM); IPR007656 (PFAM); mobidb-lite (MOBIDB_LITE); mobidb-lite (MOBIDB_LITE); mobidb-lite (MOBIDB_LITE); mobidb-lite (MOBIDB_LITE); IPR039306 (PANTHER); PTHR31448:SF32 (PANTHER); IPR039306 (PANTHER); IPR007656 (PROSITE_PROFILES)	F:GO:0017022	F:myosin binding
[INTERPRO, BLASTED, ANNOTATED]	GFTW01130944.1	AT5G66270.1	1775	3	3.43336e-09	51.63	1	F:GO:0046872	F:metal ion binding			mobidb-lite (MOBIDB_LITE); mobidb-lite (MOBIDB_LITE); PTHR33400:SF2 (PANTHER); PTHR33400 (PANTHER); IPR000571 (PROSITE_PROFILES)	F:GO:0046872	F:metal ion binding
[INTERPRO, NO-BLAST]	GFTW01131296.1	---NA---	681									no IPS match	no IPS match	no IPS match
[INTERPRO, NO-BLAST]	GFTW01131986.1	---NA---	280									mobidb-lite (MOBIDB_LITE); mobidb-lite (MOBIDB_LITE); mobidb-lite (MOBIDB_LITE)	no GO terms	no GO terms
[INTERPRO, BLASTED]	GFTW01133006.1	AT5G42760.1	2445	3	9.59296e-109	71.34						PTHR43619 (PANTHER); PTHR43619:SF4 (PANTHER)	no GO terms	no GO terms
[INTERPRO, BLASTED]	GFTW01133008.1	AT5G42765.1	644	1	1.13896e-26	77.91						PTHR36398 (PANTHER)	no GO terms	no GO terms
[INTERPRO, BLASTED, ANNOTATED]	GFTW01133019.1	AT1G44750.2	2266	20	7.38047e-135	73.8	3	F:GO:0005215; P:GO:0006810; C:GO:0016021	F:transporter activity; P:transport; C:integral component of membrane			PF16913 (PFAM); PTHR31376:SF2 (PANTHER); IPR030182 (PANTHER)	F:GO:0005215; C:GO:0016021	F:transporter activity; C:integral component of membrane
[INTERPRO, BLASTED]	GFTW01133492.1	AT1G28100.1	473	5	3.51248e-09	62.32						no IPS match	no IPS match	Hypothetical protein; xanthophyll biosynthetic process
[INTERPRO, BLASTED]	GFTW01133790.1	AT4G13250.1	1930	20	0	49.15						IPR002347 (PRINTS); IPR002347 (PFAM); G3DSA:3.40.50.720 (GENE3D); PTHR24314:SF21 (PANTHER); PTHR24314 (PANTHER); cd05233 (CDD); IPR036291 (SUPERFAMILY)	no GO terms	no GO terms
[INTERPRO, BLASTED, MAPPED, ANNOTATED]	GFTW01133794.1	AT4G01070.1	2181	20	0	60.98	2	F:GO:0008194; F:GO:0016758	F:UDP-glycosyltransferase activity; F:transferase activity, transferring hexosyl groups			G3DSA:3.40.50.2000 (GENE3D); IPR002213 (PFAM); G3DSA:3.40.50.2000 (GENE3D); PTHR11926 (PANTHER); SSF53756 (SUPERFAMILY)	F:GO:0016758	F:transferase activity, transferring hexosyl groups
[INTERPRO, BLASTED]	GFTW01133815.1	AT4G09160.1	1129	6	6.18219e-12	83.79						no IPS match	no IPS match	no IPS match
[INTERPRO, BLASTED]	GFTW01133817.1	AT4G19600.1	690	12	3.10831e-26	61.08						G3DSA:1.10.472.10 (GENE3D); PTHR10026:SF67 (PANTHER); PTHR10026 (PANTHER); IPR036915 (SUPERFAMILY)	no GO terms	no GO terms
[INTERPRO, NO-BLAST]	GFTW01133893.1	---NA---	1032									mobidb-lite (MOBIDB_LITE)	no GO terms	no GO terms
[INTERPRO, BLASTED]	GFTW01133894.1	AT4G25990.3	1068	7	9.40261e-10	51.28						mobidb-lite (MOBIDB_LITE); mobidb-lite (MOBIDB_LITE); mobidb-lite (MOBIDB_LITE); PTHR31874 (PANTHER); PTHR31874:SF10 (PANTHER)	no GO terms	no GO terms
[INTERPRO, NO-BLAST]	GFTW01136418.1	---NA---	815									no IPS match	no IPS match	no IPS match
[INTERPRO, BLASTED]	GFTW01137314.1	AT5G12020.1	710	16	9.33741e-57	66.9						IPR002068 (PFAM); IPR008978 (G3DSA:2.60.40.GENE3D); IPR031107 (PANTHER); PTHR11527:SF269 (PANTHER); IPR002068 (PROSITE_PROFILES); IPR008978 (SUPERFAMILY)	no GO terms	no GO terms
[INTERPRO, NO-BLAST]	GFTW01138540.1	---NA---	275									no IPS match	no IPS match	no IPS match
[INTERPRO, BLASTED, ANNOTATED]	GFTW01138551.1	AT5G66050.2	638	11	1.8242e-26	65.55	1	F:GO:0005515	F:protein binding			IPR001943 (PFAM); PTHR15160 (PANTHER)	F:GO:0005515	F:protein binding
[INTERPRO, NO-BLAST]	GFTW01138554.1	---NA---	1931									no IPS match	no IPS match	no IPS match
[INTERPRO, BLASTED]	GFTW01138596.1	AT1G19660.1	1925	7	5.17499e-16	58.21						mobidb-lite (MOBIDB_LITE); mobidb-lite (MOBIDB_LITE); PTHR15160 (PANTHER); PTHR15160:SF15 (PANTHER)	no GO terms	no GO terms
[INTERPRO, BLASTED]	GFTW01138599.1	AT1G19660.1	354	7	7.49922e-19	58.21						mobidb-lite (MOBIDB_LITE); mobidb-lite (MOBIDB_LITE); PTHR15160:SF15 (PANTHER); PTHR15160 (PANTHER)	no GO terms	no GO terms
[INTERPRO, BLASTED, ANNOTATED]	GFTW01138766.1	AT1G07700.2	2297	16	3.10061e-66	68.97	1	P:GO:0045454	P:cell redox homeostasis			IPR013766 (PFAM); G3DSA:3.40.30.10 (GENE3D); PTHR47912 (PANTHER); IPR013766 (PROSITE_PROFILES); cd02947 (CDD); IPR036249 (SUPERFAMILY)	P:GO:0045454	P:cell redox homeostasis
[INTERPRO, BLASTED, ANNOTATED]	GFTW01138937.1	AT2G21660.2	806	20	3.46833e-44	78.53	1	F:GO:0003676	F:nucleic acid binding			IPR000504 (SMART); IPR000504 (PFAM); IPR012677 (G3DSA:3.30.70.GENE3D); mobidb-lite (MOBIDB_LITE); mobidb-lite (MOBIDB_LITE); PTHR15241 (PANTHER); PTHR15241:SF165 (PANTHER); IPR000504 (PROSITE_PROFILES); IPR035979 (SUPERFAMILY)	F:GO:0003676	F:nucleic acid binding
[INTERPRO, BLASTED, MAPPED, ANNOTATED]	GFTW01138943.1	AT4G34131.1	1663	20	6.34786e-78	60.16	1	F:GO:0016758	F:transferase activity, transferring hexosyl groups			G3DSA:3.40.50.2000 (GENE3D); G3DSA:3.40.50.2000 (GENE3D); SSF53756 (SUPERFAMILY)	no GO terms	no GO terms
[INTERPRO, BLASTED]	GFTW01140989.1	AT1G53280.1	315	5	1.40219e-07	76						PTHR43444 (PANTHER); PTHR43444:SF18 (PANTHER)	no GO terms	no GO terms
[INTERPRO, BLASTED]	GFTW01141316.1	AT2G36220.1	993	2	1.7917e-20	50.41						mobidb-lite (MOBIDB_LITE); mobidb-lite (MOBIDB_LITE); mobidb-lite (MOBIDB_LITE); mobidb-lite (MOBIDB_LITE); mobidb-lite (MOBIDB_LITE); mobidb-lite (MOBIDB_LITE); mobidb-lite (MOBIDB_LITE); PTHR34120 (PANTHER); PTHR34120:SF2 (PANTHER)	no GO terms	no GO terms
[INTERPRO, NO-BLAST]	GFTW01141317.1	---NA---	296									mobidb-lite (MOBIDB_LITE); mobidb-lite (MOBIDB_LITE)	no GO terms	no GO terms
[INTERPRO, NO-BLAST]	GFTW01141318.1	---NA---	769									PS51257 (PROSITE_PROFILES)	no GO terms	no GO terms
[INTERPRO, BLASTED]	GFTW01141415.1	AT2G43780.3	569	4	4.29475e-23	80.65						PTHR36744 (PANTHER)	no GO terms	no GO terms
[INTERPRO, NO-BLAST]	GFTW01141562.1	---NA---	372									no IPS match	no IPS match	no IPS match
[INTERPRO, BLASTED]	GFTW01141686.1	AT5G22640.2	441	3	3.05784e-05	77.42						no IPS match	no IPS match	no IPS match
[INTERPRO, NO-BLAST]	GFTW01142181.1	---NA---	1181									no IPS match	no IPS match	no IPS match
[INTERPRO, BLASTED, ANNOTATED]	GFTW01142409.1	AT1G02740.1	1868	2	4.72422e-83	67.43	3	C:GO:0005634; P:GO:0006325; P:GO:0006355	C:nucleus; P:chromatin organization; P:regulation of transcription, DNA-templated			IPR038217 (G3DSA:1.10.274.GENE3D); IPR026541 (PFAM); G3DSA:2.30.30.140 (GENE3D); IPR008676 (PIRSF); IPR025995 (PFAM); mobidb-lite (MOBIDB_LITE); mobidb-lite (MOBIDB_LITE); IPR008676 (PANTHER); PTHR10880:SF33 (PANTHER); IPR026541 (PROSITE_PROFILES); IPR000953 (CDD); IPR016197 (SUPERFAMILY)	C:GO:0005634; P:GO:0006325; P:GO:0006355	C:nucleus; P:chromatin organization; P:regulation of transcription, DNA-templated
[INTERPRO, BLASTED, ANNOTATED]	GFTW01143313.1	AT5G17770.1	744	4	1.51198e-137	68.38	2	F:GO:0016491; P:GO:0055114	F:oxidoreductase activity; P:oxidation-reduction process			IPR001709 (PRINTS); IPR001834 (PRINTS); IPR039261 (G3DSA:3.40.50.GENE3D); G3DSA:2.40.30.10 (GENE3D); IPR008333 (PFAM); IPR001433 (PFAM); PTHR19370:SF194 (PANTHER); PTHR19370 (PANTHER); IPR017927 (PROSITE_PROFILES); cd06183 (CDD); IPR039261 (SUPERFAMILY); IPR017938 (SUPERFAMILY)	F:GO:0016491; P:GO:0055114	F:oxidoreductase activity; P:oxidation-reduction process
[INTERPRO, BLASTED, ANNOTATED]	GFTW01143972.1	AT5G04220.2	1955	20	0	64.19	1	F:GO:0008289	F:lipid binding			IPR000008 (PRINTS); IPR000008 (SMART); IPR035892 (G3DSA:2.60.40.GENE3D); IPR000008 (PFAM); IPR039010 (PFAM); IPR035892 (G3DSA:2.60.40.GENE3D); PTHR10774:SF181 (PANTHER); PTHR10774 (PANTHER); IPR000008 (PROSITE_PROFILES); IPR000008 (PROSITE_PROFILES); IPR031468 (PROSITE_PROFILES); cd00030 (CDD); cd00030 (CDD); SSF49562 (SUPERFAMILY); SSF49562 (SUPERFAMILY)	F:GO:0008289	F:lipid binding
[INTERPRO, BLASTED, ANNOTATED]	GFTW01144129.1	AT1G55150.1	1385	20	0	81.55	2	F:GO:0003676; F:GO:0005524	F:nucleic acid binding; F:ATP binding			IPR001650 (SMART); IPR014001 (SMART); G3DSA:3.40.50.300 (GENE3D); IPR011545 (PFAM); IPR001650 (PFAM); G3DSA:3.40.50.300 (GENE3D); mobidb-lite (MOBIDB_LITE); PTHR24031:SF683 (PANTHER); PTHR24031 (PANTHER); IPR001650 (PROSITE_PROFILES); IPR014001 (PROSITE_PROFILES); cd00268 (CDD); IPR001650 (CDD); IPR027417 (SUPERFAMILY)	F:GO:0003676; F:GO:0005524	F:nucleic acid binding; F:ATP binding
[INTERPRO, BLASTED, ANNOTATED]	GFTW01144552.1	AT5G18840.1	531	20	1.10002e-67	73.7	3	C:GO:0016021; F:GO:0022857; P:GO:0055085	C:integral component of membrane; F:transmembrane transporter activity; P:transmembrane transport			IPR003663 (PRINTS); G3DSA:1.20.1250.20 (GENE3D); IPR005828 (PFAM); PTHR23500:SF513 (PANTHER); PTHR23500 (PANTHER); IPR020846 (PROSITE_PROFILES); IPR036259 (SUPERFAMILY)	C:GO:0016020; C:GO:0016021; F:GO:0022857; P:GO:0055085	C:membrane; C:integral component of membrane; F:transmembrane transporter activity; P:transmembrane transport
[INTERPRO, BLASTED, ANNOTATED]	GFTW01144556.1	AT5G18840.1	551	20	2.09728e-74	74.16	3	C:GO:0016021; F:GO:0022857; P:GO:0055085	C:integral component of membrane; F:transmembrane transporter activity; P:transmembrane transport			IPR005828 (PFAM); G3DSA:1.20.1250.20 (GENE3D); PTHR23500 (PANTHER); PTHR23500:SF513 (PANTHER); IPR020846 (PROSITE_PROFILES); IPR020846 (CDD); IPR036259 (SUPERFAMILY)	C:GO:0016021; F:GO:0022857; P:GO:0055085	C:integral component of membrane; F:transmembrane transporter activity; P:transmembrane transport
[INTERPRO, BLASTED]	GFTW01144640.1	AT3G13570.1	905	13	1.92953e-18	81.26						mobidb-lite (MOBIDB_LITE); mobidb-lite (MOBIDB_LITE); mobidb-lite (MOBIDB_LITE); mobidb-lite (MOBIDB_LITE); PTHR23147 (PANTHER); PTHR23147:SF122 (PANTHER)	no GO terms	no GO terms
[INTERPRO, BLASTED]	GFTW01145217.1	AT3G02600.6	740	20	1.18467e-60	88.11						G3DSA:1.20.144.10 (GENE3D); PTHR10165 (PANTHER); PTHR10165:SF161 (PANTHER); IPR036938 (SUPERFAMILY)	no GO terms	no GO terms
[INTERPRO, BLASTED]	GFTW01145221.1	AT3G02600.6	1510	20	6.35168e-134	82.08						IPR000326 (SMART); G3DSA:1.20.144.10 (GENE3D); IPR000326 (PFAM); mobidb-lite (MOBIDB_LITE); PTHR10165 (PANTHER); PTHR10165:SF169 (PANTHER); cd03390 (CDD); IPR036938 (SUPERFAMILY)	no GO terms	no GO terms
[INTERPRO, BLASTED, ANNOTATED]	GFTW01145640.1	AT5G66760.1	2066	3	0	79.52	4	P:GO:0006099; F:GO:0016627; P:GO:0022900; F:GO:0050660	P:tricarboxylic acid cycle; F:oxidoreductase activity, acting on the CH-CH group of donors; P:electron transport chain; F:flavin adenine dinucleotide binding			IPR014006 (TIGRFAM); IPR027477 (G3DSA:3.90.700.GENE3D); IPR036188 (G3DSA:3.50.50.GENE3D); IPR015939 (PFAM); G3DSA:1.20.58.100 (GENE3D); PIRSF000171 (PIRSF); IPR003953 (PFAM); G3DSA:4.10.80.40 (GENE3D); IPR011281 (TIGRFAM); PTHR11632 (PANTHER); PTHR11632:SF76 (PANTHER); IPR037099 (SUPERFAMILY); IPR027477 (SUPERFAMILY); IPR036188 (SUPERFAMILY)	P:GO:0006099; F:GO:0016491; F:GO:0016627; P:GO:0022900; F:GO:0050660; P:GO:0055114	P:tricarboxylic acid cycle; F:oxidoreductase activity; F:oxidoreductase activity, acting on the CH-CH group of donors; P:electron transport chain; F:flavin adenine dinucleotide binding; P:oxidation-reduction process
[INTERPRO, NO-BLAST]	GFTW01145969.1	---NA---	462									no IPS match	no IPS match	no IPS match
[INTERPRO, NO-BLAST]	GFTW01146408.1	---NA---	374									no IPS match	no IPS match	no IPS match
[INTERPRO, BLASTED]	GFTW01147575.1	AT5G41800.1	499	20	1.31444e-53	60.83						IPR013057 (PFAM); PTHR22950 (PANTHER); PTHR22950:SF537 (PANTHER)	no GO terms	no GO terms
[INTERPRO, BLASTED, ANNOTATED]	GFTW01148504.1	AT1G61810.3	456	20	1.03967e-14	62.63	2	F:GO:0004553; P:GO:0005975	F:hydrolase activity, hydrolyzing O-glycosyl compounds; P:carbohydrate metabolic process			IPR001360 (PRINTS); IPR001360 (PFAM); G3DSA:3.20.20.80 (GENE3D); PTHR10353:SF153 (PANTHER); IPR001360 (PANTHER); IPR017853 (SUPERFAMILY)	F:GO:0004553; P:GO:0005975	F:hydrolase activity, hydrolyzing O-glycosyl compounds; P:carbohydrate metabolic process
[INTERPRO, BLASTED]	GFTW01148550.1	AT2G41430.3	768	7	3.36959e-24	80.4						IPR009818 (PFAM); mobidb-lite (MOBIDB_LITE); PTHR33790:SF10 (PANTHER); IPR040414 (PANTHER)	no GO terms	no GO terms
[INTERPRO, BLASTED]	GFTW01149400.1	AT3G55740.1	1680	20	2.29489e-97	53.91						IPR013057 (PFAM); mobidb-lite (MOBIDB_LITE); mobidb-lite (MOBIDB_LITE); PTHR22950 (PANTHER); PTHR22950:SF268 (PANTHER)	no GO terms	no GO terms
[INTERPRO, NO-BLAST]	GFTW01149405.1	---NA---	517									no IPS match	no IPS match	no IPS match
[INTERPRO, BLASTED, ANNOTATED]	GFTW01150565.1	AT1G01980.1	1802	20	4.11322e-129	68.69	3	F:GO:0016491; F:GO:0050660; P:GO:0055114	F:oxidoreductase activity; F:flavin adenine dinucleotide binding; P:oxidation-reduction process			G3DSA:3.40.462.20 (GENE3D); G3DSA:3.30.465.50 (GENE3D); IPR012951 (PFAM); PTHR32448:SF34 (PANTHER); PTHR32448 (PANTHER); IPR036318 (SUPERFAMILY)	F:GO:0016491; F:GO:0050660; P:GO:0055114	F:oxidoreductase activity; F:flavin adenine dinucleotide binding; P:oxidation-reduction process
[INTERPRO, BLASTED, ANNOTATED]	GFTW01150788.1	AT3G61040.1	1685	20	1.40637e-120	60.58	4	F:GO:0005506; F:GO:0016705; F:GO:0020037; P:GO:0055114	F:iron ion binding; F:oxidoreductase activity, acting on paired donors, with incorporation or reduction of molecular oxygen; F:heme binding; P:oxidation-reduction process			IPR002401 (PRINTS); IPR001128 (PRINTS); IPR036396 (G3DSA:1.10.630.GENE3D); IPR001128 (PFAM); PTHR24281 (PANTHER); IPR036396 (SUPERFAMILY)	F:GO:0005506; F:GO:0016705; F:GO:0020037; P:GO:0055114	F:iron ion binding; F:oxidoreductase activity, acting on paired donors, with incorporation or reduction of molecular oxygen; F:heme binding; P:oxidation-reduction process
[INTERPRO, BLASTED, ANNOTATED]	GFTW01152005.1	AT5G48770.1	552	20	3.92655e-31	51.18	2	F:GO:0005515; P:GO:0007165	F:protein binding; P:signal transduction			IPR000157 (PFAM); IPR035897 (G3DSA:3.40.50.GENE3D); PTHR32009 (PANTHER); PTHR32009:SF50 (PANTHER); IPR000157 (PROSITE_PROFILES); IPR035897 (SUPERFAMILY)	F:GO:0005515; P:GO:0007165	F:protein binding; P:signal transduction
[INTERPRO, NO-BLAST]	GFTW01152159.1	---NA---	610									no IPS match	no IPS match	no IPS match
[INTERPRO, BLASTED]	GFTW01152891.1	AT5G06130.2	1666	4	4.68141e-136	82.18						PTHR15852 (PANTHER); PTHR15852:SF8 (PANTHER)	no GO terms	no GO terms
[INTERPRO, BLASTED]	GFTW01153379.1	AT1G01360.1	2089	14	5.31195e-17	76.56						no IPS match	no IPS match	Encodes RCAR1 (regulatory components of ABA receptor). Interacts with and regulates the type 2C protein phosphatases (PP2Cs) ABI1 and ABI2. Functions as abscisic acid sensor. The mRNA is cell-to-cell mobile.
[INTERPRO, BLASTED]	GFTW01154367.1	AT4G13670.1	786	4	4.47932e-79	80.25						IPR002477 (PFAM); PTHR15852:SF16 (PANTHER); PTHR15852 (PANTHER); IPR036410 (SUPERFAMILY); IPR036365 (SUPERFAMILY)	no GO terms	no GO terms
[INTERPRO, BLASTED]	GFTW01154368.1	AT4G13670.3	460	4	5.18903e-34	75.37						IPR036366 (G3DSA:1.10.101.GENE3D); IPR002477 (PFAM); PTHR15852:SF16 (PANTHER); PTHR15852 (PANTHER); IPR036365 (SUPERFAMILY)	no GO terms	no GO terms
[INTERPRO, BLASTED, ANNOTATED]	GFTW01154454.1	ATMG00070.1	1659	2	9.15226e-119	79.56	5	P:GO:0006120; P:GO:0006744; P:GO:0006814; F:GO:0008137; P:GO:1902600	P:mitochondrial electron transport, NADH to ubiquinone; P:ubiquinone biosynthetic process; P:sodium ion transport; F:NADH dehydrogenase (ubiquinone) activity; P:proton transmembrane transport			IPR037232 (G3DSA:3.30.460.GENE3D); IPR001268 (PFAM); IPR010218 (TIGRFAM); PTHR10884 (PANTHER); PTHR10884:SF10 (PANTHER); IPR001268 (PRODOM); IPR010218 (HAMAP); IPR037232 (SUPERFAMILY)	F:GO:0008137; F:GO:0016651; P:GO:0055114	F:NADH dehydrogenase (ubiquinone) activity; F:oxidoreductase activity, acting on NAD(P)H; P:oxidation-reduction process
[INTERPRO, BLASTED, ANNOTATED]	GFTW01154946.1	AT3G46640.3	803	20	7.49583e-39	74.59	1	F:GO:0003677	F:DNA binding			G3DSA:1.10.10.60 (GENE3D); IPR006447 (TIGRFAM); mobidb-lite (MOBIDB_LITE); PTHR31442:SF27 (PANTHER); PTHR31442 (PANTHER); IPR009057 (SUPERFAMILY)	F:GO:0003677	F:DNA binding
[INTERPRO, BLASTED, ANNOTATED]	GFTW01154947.1	AT3G46640.1	1098	20	4.20734e-55	79.42	1	F:GO:0003677	F:DNA binding			G3DSA:1.10.10.60 (GENE3D); IPR001005 (PFAM); IPR006447 (TIGRFAM); mobidb-lite (MOBIDB_LITE); mobidb-lite (MOBIDB_LITE); PTHR31442 (PANTHER); PTHR31442:SF21 (PANTHER); IPR017930 (PROSITE_PROFILES); IPR009057 (SUPERFAMILY)	F:GO:0003677	F:DNA binding
[INTERPRO, BLASTED, ANNOTATED]	GFTW01156392.1	AT1G28050.1	2817	20	1.79098e-35	60.08	1	F:GO:0005515	F:protein binding			IPR010402 (PFAM); PTHR31717:SF45 (PANTHER); PTHR31717 (PANTHER); IPR010402 (PROSITE_PROFILES)	F:GO:0005515	F:protein binding
[INTERPRO, BLASTED, ANNOTATED]	GFTW01156393.1	AT2G33500.1	2121	20	6.0012e-55	57.32	2	F:GO:0005515; F:GO:0008270	F:protein binding; F:zinc ion binding			IPR000315 (SMART); IPR000315 (PFAM); IPR010402 (PFAM); PTHR31717 (PANTHER); PTHR31717:SF45 (PANTHER); IPR000315 (PROSITE_PROFILES); IPR010402 (PROSITE_PROFILES); IPR000315 (PROSITE_PROFILES); IPR000315 (CDD); IPR000315 (CDD)	F:GO:0005515; F:GO:0008270	F:protein binding; F:zinc ion binding
[INTERPRO, BLASTED, ANNOTATED]	GFTW01156431.1	AT2G01630.1	3163	20	0	68.94	2	F:GO:0004553; P:GO:0005975	F:hydrolase activity, hydrolyzing O-glycosyl compounds; P:carbohydrate metabolic process			IPR012946 (SMART); IPR012946 (PFAM); IPR000490 (PFAM); G3DSA:3.20.20.80 (GENE3D); PTHR32227 (PANTHER); PTHR32227:SF323 (PANTHER); IPR017853 (SUPERFAMILY)	F:GO:0004553; P:GO:0005975	F:hydrolase activity, hydrolyzing O-glycosyl compounds; P:carbohydrate metabolic process
[INTERPRO, NO-BLAST]	GFTW01158221.1	---NA---	299									no IPS match	no IPS match	no IPS match
[INTERPRO, BLASTED]	GFTW01159000.1	AT3G20810.5	707	5	9.59439e-52	84.72						IPR041667 (PFAM); G3DSA:2.60.120.650 (GENE3D); PTHR12461:SF86 (PANTHER); PTHR12461 (PANTHER); SSF51197 (SUPERFAMILY)	no GO terms	no GO terms
[INTERPRO, NO-BLAST]	GFTW01159028.1	---NA---	819									no IPS match	no IPS match	no IPS match
[INTERPRO, BLASTED, ANNOTATED]	GFTW01161576.1	AT2G14210.1	2588	20	3.24476e-35	87.5	3	F:GO:0000977; P:GO:0045944; F:GO:0046983	F:RNA polymerase II regulatory region sequence-specific DNA binding; P:positive regulation of transcription by RNA polymerase II; F:protein dimerization activity			IPR002100 (PRINTS); IPR002100 (SMART); IPR002100 (PFAM); IPR036879 (G3DSA:3.40.1810.GENE3D); PTHR11945 (PANTHER); PTHR11945:SF545 (PANTHER); IPR002100 (PROSITE_PROFILES); IPR033896 (CDD); IPR036879 (SUPERFAMILY)	F:GO:0000977; F:GO:0003677; P:GO:0045944; F:GO:0046983	F:RNA polymerase II regulatory region sequence-specific DNA binding; F:DNA binding; P:positive regulation of transcription by RNA polymerase II; F:protein dimerization activity
[INTERPRO, BLASTED, ANNOTATED]	GFTW01162008.1	AT5G20190.1	1798	7	2.25063e-41	71.02	1	F:GO:0005515	F:protein binding			IPR011990 (G3DSA:1.25.40.GENE3D); PTHR26312 (PANTHER); PTHR26312:SF73 (PANTHER); IPR013026 (PROSITE_PROFILES); IPR011990 (SUPERFAMILY)	F:GO:0005515	F:protein binding
[INTERPRO, BLASTED]	GFTW01162273.1	AT2G29670.2	1070	7	4.77454e-53	87.52						PTHR26312 (PANTHER); PTHR26312:SF139 (PANTHER)	no GO terms	no GO terms
[INTERPRO, BLASTED]	GFTW01162276.1	AT2G29670.2	771	7	1.3741e-79	65.99						mobidb-lite (MOBIDB_LITE); PTHR26312:SF139 (PANTHER); PTHR26312 (PANTHER)	no GO terms	no GO terms
[INTERPRO, NO-BLAST]	GFTW01162634.1	---NA---	241									no IPS match	no IPS match	no IPS match
[INTERPRO, NO-BLAST]	GFTW01162977.1	---NA---	1175									no IPS match	no IPS match	no IPS match
[INTERPRO, BLASTED, ANNOTATED]	GFTW01163148.1	AT4G36830.1	1510	5	8.0125e-86	70.08	1	C:GO:0016021	C:integral component of membrane			IPR002076 (PFAM); mobidb-lite (MOBIDB_LITE); IPR002076 (PANTHER); PTHR11157:SF123 (PANTHER)	C:GO:0016021	C:integral component of membrane
[INTERPRO, BLASTED, ANNOTATED]	GFTW01163159.1	AT4G21760.1	1564	20	5.37202e-19	73.01	2	F:GO:0004553; P:GO:0005975	F:hydrolase activity, hydrolyzing O-glycosyl compounds; P:carbohydrate metabolic process			G3DSA:3.20.20.80 (GENE3D); IPR001360 (PFAM); PTHR10353:SF27 (PANTHER); IPR001360 (PANTHER); IPR017853 (SUPERFAMILY)	F:GO:0004553; P:GO:0005975	F:hydrolase activity, hydrolyzing O-glycosyl compounds; P:carbohydrate metabolic process
[INTERPRO, BLASTED, ANNOTATED]	GFTW01164208.1	AT5G57590.1	2430	5	0	50.08	2	F:GO:0008483; F:GO:0030170	F:transaminase activity; F:pyridoxal phosphate binding			IPR005814 (PFAM); IPR015422 (G3DSA:3.90.1150.GENE3D); IPR015421 (G3DSA:3.40.640.GENE3D); PTHR42684:SF3 (PANTHER); PTHR42684 (PANTHER); IPR015424 (SUPERFAMILY)	F:GO:0003824; F:GO:0008483; F:GO:0030170	F:catalytic activity; F:transaminase activity; F:pyridoxal phosphate binding
[INTERPRO, BLASTED, ANNOTATED]	GFTW01165260.1	AT4G00900.1	3687	20	0	57.15	2	F:GO:0000166; C:GO:0016021	F:nucleotide binding; C:integral component of membrane			PR00119 (PRINTS); PR00121 (PRINTS); IPR004014 (SMART); IPR004014 (PFAM); G3DSA:1.20.1110.10 (GENE3D); IPR001757 (TIGRFAM); IPR006068 (PFAM); PF00122 (PFAM); IPR023299 (G3DSA:3.40.1110.GENE3D); PF00702 (PFAM); G3DSA:2.70.150.10 (GENE3D); G3DSA:2.60.120.1500 (GENE3D); IPR023214 (G3DSA:3.40.50.GENE3D); G3DSA:1.20.1110.10 (GENE3D),SFLDS00003 (SFLD),SFLDF00027 (SFLD); PTHR42861 (PANTHER); PTHR42861:SF…	F:GO:0000166; C:GO:0016021	F:nucleotide binding; C:integral component of membrane
[INTERPRO, BLASTED]	GFTW01165737.1	AT4G16835.1	959	20	4.60573e-28	61.72						no IPS match	no IPS match	no IPS match
[INTERPRO, NO-BLAST]	GFTW01166049.1	---NA---	6794									no IPS match	no IPS match	no IPS match
[INTERPRO, NO-BLAST]	GFTW01166942.1	---NA---	615									no IPS match	no IPS match	no IPS match
[INTERPRO, NO-BLAST]	GFTW01166978.1	---NA---	734									no IPS match	no IPS match	no IPS match
[INTERPRO, BLASTED]	GFTW01167401.1	AT3G17860.4	859	20	1.47309e-25	53.18						IPR010399 (PFAM); IPR018467 (PFAM); PTHR33077:SF42 (PANTHER); IPR040390 (PANTHER); IPR010399 (PROSITE_PROFILES)	no GO terms	no GO terms
[INTERPRO, BLASTED, ANNOTATED]	GFTW01167638.1	AT5G65280.1	1728	4	0	72.19	1	F:GO:0003824	F:catalytic activity			IPR007822 (PRINTS); IPR020464 (PRINTS); IPR007822 (SMART); IPR007822 (PFAM); IPR012341 (G3DSA:1.50.10.GENE3D); mobidb-lite (MOBIDB_LITE); PTHR12736:SF14 (PANTHER); PTHR12736 (PANTHER); IPR020464 (CDD); SSF158745 (SUPERFAMILY)	F:GO:0003824	F:catalytic activity
[INTERPRO, BLASTED]	GFTW01167718.1	AT4G00755.2	1066	2	6.79222e-48	55.36						PTHR39741 (PANTHER); PTHR39741:SF2 (PANTHER)	no GO terms	no GO terms
[INTERPRO, NO-BLAST]	GFTW01167939.1	---NA---	503									no IPS match	no IPS match	no IPS match
[INTERPRO, BLASTED]	GFTW01167964.1	AT4G11410.1	278	17	5.98526e-14	66.77						no IPS match	no IPS match	no IPS match
[INTERPRO, BLASTED]	GFTW01167971.1	AT4G23420.2	332	5	0.000288358	68.54						G3DSA:3.40.50.720 (GENE3D); PTHR24320 (PANTHER); PTHR24320:SF190 (PANTHER); IPR036291 (SUPERFAMILY)	no GO terms	no GO terms
[INTERPRO, BLASTED, ANNOTATED]	GFTW01168819.1	AT4G32400.1	1692	20	2.67521e-137	54.55	2	F:GO:0022857; P:GO:0055085	F:transmembrane transporter activity; P:transmembrane transport			IPR002067 (PRINTS); IPR023395 (G3DSA:1.50.40.GENE3D); IPR018108 (PFAM); PTHR24089 (PANTHER); PTHR24089:SF182 (PANTHER); IPR018108 (PROSITE_PROFILES); IPR018108 (PROSITE_PROFILES); IPR018108 (PROSITE_PROFILES); IPR023395 (SUPERFAMILY)	F:GO:0022857; P:GO:0055085	F:transmembrane transporter activity; P:transmembrane transport
[INTERPRO, NO-BLAST]	GFTW01169180.1	---NA---	1778									no IPS match	no IPS match	no IPS match
[INTERPRO, BLASTED, ANNOTATED]	GFTW01170054.1	AT1G05590.1	2078	5	0	64.39	5	P:GO:0001575; F:GO:0004563; P:GO:0005975; P:GO:0006027; P:GO:0006040	P:globoside metabolic process; F:beta-N-acetylhexosaminidase activity; P:carbohydrate metabolic process; P:glycosaminoglycan catabolic process; P:amino sugar metabolic process			IPR025705 (PRINTS); IPR029019 (PFAM); G3DSA:3.20.20.80 (GENE3D); IPR025705 (PIRSF); IPR015883 (PFAM); IPR029018 (G3DSA:3.30.379.GENE3D); PTHR22600 (PANTHER); PTHR22600:SF43 (PANTHER); cd06562 (CDD); IPR017853 (SUPERFAMILY); IPR029018 (SUPERFAMILY)	F:GO:0004553; F:GO:0004563; P:GO:0005975	F:hydrolase activity, hydrolyzing O-glycosyl compounds; F:beta-N-acetylhexosaminidase activity; P:carbohydrate metabolic process
[INTERPRO, BLASTED, ANNOTATED]	GFTW01172059.1	AT4G17030.1	1196	20	1.5944e-97	53.72	2	C:GO:0005576; P:GO:0019953	C:extracellular region; P:sexual reproduction			IPR007118 (PRINTS); IPR005795 (PRINTS); IPR007112 (SMART); IPR007117 (PFAM); IPR036908 (G3DSA:2.40.40.GENE3D); IPR036749 (G3DSA:2.60.40.GENE3D); IPR009009 (PFAM); PTHR31692:SF2 (PANTHER); PTHR31692 (PANTHER); IPR007112 (PROSITE_PROFILES); IPR007117 (PROSITE_PROFILES); IPR036749 (SUPERFAMILY); IPR036908 (SUPERFAMILY)	C:GO:0005576; P:GO:0019953	C:extracellular region; P:sexual reproduction
[INTERPRO, BLASTED, ANNOTATED]	GFTW01177540.1	AT4G37320.1	669	20	8.75891e-34	65.01	4	F:GO:0005506; F:GO:0016705; F:GO:0020037; P:GO:0055114	F:iron ion binding; F:oxidoreductase activity, acting on paired donors, with incorporation or reduction of molecular oxygen; F:heme binding; P:oxidation-reduction process			IPR036396 (G3DSA:1.10.630.GENE3D); IPR001128 (PFAM); mobidb-lite (MOBIDB_LITE); PTHR24281 (PANTHER); IPR036396 (SUPERFAMILY)	F:GO:0005506; F:GO:0016705; F:GO:0020037; P:GO:0055114	F:iron ion binding; F:oxidoreductase activity, acting on paired donors, with incorporation or reduction of molecular oxygen; F:heme binding; P:oxidation-reduction process
[INTERPRO, BLASTED]	GFTW01177541.1	AT5G67310.1	602	20	2.41196e-34	65.59						mobidb-lite (MOBIDB_LITE)	no GO terms	no GO terms
[INTERPRO, NO-BLAST]	GFTW01177597.1	---NA---	1201									no IPS match	no IPS match	no IPS match
[INTERPRO, BLASTED, ANNOTATED]	GFTW01178764.1	AT1G79640.6	3070	20	1.02661e-39	72.07	3	F:GO:0004672; F:GO:0005524; P:GO:0006468	F:protein kinase activity; F:ATP binding; P:protein phosphorylation			IPR000719 (PFAM); G3DSA:3.30.200.20 (GENE3D); G3DSA:1.10.510.10 (GENE3D); PTHR24361:SF488 (PANTHER); PTHR24361 (PANTHER); IPR000719 (PROSITE_PROFILES); IPR011009 (SUPERFAMILY)	F:GO:0004672; F:GO:0005524; P:GO:0006468	F:protein kinase activity; F:ATP binding; P:protein phosphorylation
[INTERPRO, NO-BLAST]	GFTW01179940.1	---NA---	1271									no IPS match	no IPS match	no IPS match
[INTERPRO, BLASTED]	GFTW01179959.1	AT1G10760.2	2924	6	0	68.46						PTHR46999:SF1 (PANTHER); PTHR46999 (PANTHER)	no GO terms	no GO terms
[INTERPRO, NO-BLAST]	GFTW01180405.1	---NA---	2289									no IPS match	no IPS match	no IPS match
[INTERPRO, BLASTED]	GFTW01180516.1	AT1G19715.1	316	5	0.000120289	61.38						IPR036404 (G3DSA:2.100.10.GENE3D); mobidb-lite (MOBIDB_LITE); mobidb-lite (MOBIDB_LITE); IPR001229 (PROSITE_PROFILES); IPR036404 (SUPERFAMILY)	no GO terms	no GO terms
[INTERPRO, NO-BLAST]	GFTW01180528.1	---NA---	288									IPR036404 (G3DSA:2.100.10.GENE3D); PTHR47293 (PANTHER); PTHR47293:SF6 (PANTHER); IPR001229 (PROSITE_PROFILES); IPR036404 (SUPERFAMILY)	no GO terms	no GO terms
[INTERPRO, NO-BLAST, ANNOTATED]	GFTW01181297.1	---NA---	328				1	P:GO:0006952	P:defense response			IPR024949 (PRINTS); IPR000916 (PFAM); IPR023393 (G3DSA:3.30.530.GENE3D); PTHR31213:SF55 (PANTHER); PTHR31213 (PANTHER); cd07816 (CDD); SSF55961 (SUPERFAMILY)	P:GO:0006952	P:defense response
[INTERPRO, NO-BLAST]	GFTW01181301.1	---NA---	462									no IPS match	no IPS match	no IPS match
[INTERPRO, NO-BLAST]	GFTW01182734.1	---NA---	340									no IPS match	no IPS match	no IPS match
[INTERPRO, BLASTED, ANNOTATED]	GFTW01184629.1	AT5G19010.1	408	20	2.41911e-58	93.44	3	F:GO:0004672; F:GO:0005524; P:GO:0006468	F:protein kinase activity; F:ATP binding; P:protein phosphorylation			IPR000719 (PFAM); G3DSA:1.10.510.10 (GENE3D); PTHR24055:SF434 (PANTHER); PTHR24055 (PANTHER); IPR011009 (SUPERFAMILY)	F:GO:0004672; F:GO:0005524; P:GO:0006468	F:protein kinase activity; F:ATP binding; P:protein phosphorylation
[INTERPRO, BLASTED, ANNOTATED]	GFTW01185670.1	AT1G68050.1	2263	20	0	61.76	1	F:GO:0005515	F:protein binding			G3DSA:1.20.1280.50 (GENE3D); IPR011498 (PFAM); G3DSA:3.30.450.20 (GENE3D); IPR000014 (TIGRFAM); IPR015915 (G3DSA:2.120.10.GENE3D); IPR001810 (PFAM); PF13415 (PFAM); IPR000014 (PFAM); PF13418 (PFAM); PTHR46175:SF2 (PANTHER); PTHR46175 (PANTHER); IPR000014 (PROSITE_PROFILES); IPR000014 (CDD); IPR011043 (SUPERFAMILY); IPR036047 (SUPERFAMILY); IPR035965 (SUPERFAMILY)	F:GO:0005515	F:protein binding
[INTERPRO, BLASTED]	GFTW01185828.1	AT1G61820.3	2235	20	1.30252e-15	79.4						no IPS match	no IPS match	BETA GLUCOSIDASE 46, BGLU46

## Sheet: BLAST2GO_upregulated
Supplemental Table 3. BLAST2GO outputs for Guayule transcripts that were either up or down-regulated by low water conditions.
Tags	SeqName	Description	Length	#Hits	e-Value	sim mean	#GO	GO IDs	GO Names	Enzyme Codes	Enzyme Names	InterPro IDs	InterPro GO IDs	InterPro GO Names
[INTERPRO, NO-BLAST]	GFTW01001768.1	---NA---	610									no IPS match	no IPS match	no IPS match
[INTERPRO, BLASTED]	GFTW01002496.1	AT2G32240.1	292	1	0.000745846	66.67						mobidb-lite (MOBIDB_LITE); mobidb-lite (MOBIDB_LITE); mobidb-lite (MOBIDB_LITE); mobidb-lite (MOBIDB_LITE); mobidb-lite (MOBIDB_LITE); PTHR43049:SF1 (PANTHER); PTHR43049 (PANTHER); SSF90257 (SUPERFAMILY)	no GO terms	no GO terms
[INTERPRO, BLASTED]	GFTW01003672.1	AT2G26560.1	395	11	8.4568e-55	69.94						G3DSA:3.40.1090.10 (GENE3D); PTHR32176:SF6 (PANTHER); PTHR32176 (PANTHER); IPR016035 (SUPERFAMILY)	no GO terms	no GO terms
[INTERPRO, BLASTED, GO-SLIM]	GFTW01006276.1	AT3G62270.1	611	20	2.72196e-44	67.42	2	C:GO:0005575; F:GO:0022857	C:cellular_component; F:transmembrane transporter activity			mobidb-lite (MOBIDB_LITE); mobidb-lite (MOBIDB_LITE); mobidb-lite (MOBIDB_LITE); mobidb-lite (MOBIDB_LITE); PTHR11453:SF94 (PANTHER); IPR003020 (PANTHER)	F:GO:0005452; P:GO:0006820; C:GO:0016020	F:inorganic anion exchanger activity; P:anion transport; C:membrane
[INTERPRO, BLASTED]	GFTW01007349.1	AT1G59760.1	376	6	6.0617e-58	63.4						G3DSA:3.40.50.300 (GENE3D); PTHR12131:SF7 (PANTHER); PTHR12131 (PANTHER); IPR014001 (PROSITE_PROFILES); cd00046 (CDD); IPR027417 (SUPERFAMILY)	no GO terms	no GO terms
[INTERPRO, NO-BLAST]	GFTW01010116.1	---NA---	240									no IPS match	no IPS match	no IPS match
[INTERPRO, BLASTED, GO-SLIM]	GFTW01011916.1	AT5G53460.1	438	3	6.34907e-34	89.66	1	F:GO:0016491	F:oxidoreductase activity			IPR036485 (G3DSA:2.160.20.GENE3D); PTHR11938:SF131 (PANTHER); PTHR11938 (PANTHER); IPR036485 (SUPERFAMILY)	F:GO:0016491; P:GO:0055114	F:oxidoreductase activity; P:oxidation-reduction process
[INTERPRO, NO-BLAST]	GFTW01012670.1	---NA---	237									no IPS match	no IPS match	no IPS match
[INTERPRO, BLASTED, GO-SLIM]	GFTW01013581.1	AT1G31420.2	349	20	3.57221e-37	58.7	3	P:GO:0006464; F:GO:0016301; F:GO:0043167	P:cellular protein modification process; F:kinase activity; F:ion binding			G3DSA:1.10.510.10 (GENE3D); PTHR27001:SF708 (PANTHER); PTHR27001 (PANTHER); IPR000719 (PROSITE_PROFILES); IPR011009 (SUPERFAMILY)	F:GO:0004672; F:GO:0005524; P:GO:0006468	F:protein kinase activity; F:ATP binding; P:protein phosphorylation
[INTERPRO, NO-BLAST]	GFTW01014565.1	---NA---	266									mobidb-lite (MOBIDB_LITE); PTHR33047 (PANTHER); PTHR33047:SF8 (PANTHER)	no GO terms	no GO terms
[INTERPRO, NO-BLAST]	GFTW01017542.1	---NA---	1816									mobidb-lite (MOBIDB_LITE)	no GO terms	no GO terms
[INTERPRO, NO-BLAST]	GFTW01018131.1	---NA---	1699									IPR036908 (G3DSA:2.40.40.GENE3D); IPR009009 (PFAM); mobidb-lite (MOBIDB_LITE); mobidb-lite (MOBIDB_LITE); PTHR34586:SF3 (PANTHER); PTHR34586 (PANTHER); IPR036908 (SUPERFAMILY)	no GO terms	no GO terms
[INTERPRO, NO-BLAST]	GFTW01020097.1	---NA---	295									mobidb-lite (MOBIDB_LITE)	no GO terms	no GO terms
[INTERPRO, NO-BLAST]	GFTW01021168.1	---NA---	386									mobidb-lite (MOBIDB_LITE)	no GO terms	no GO terms
[INTERPRO, NO-BLAST]	GFTW01025050.1	---NA---	403									no IPS match	no IPS match	no IPS match
[INTERPRO, BLASTED, GO-SLIM]	GFTW01026974.1	AT1G73600.2	425	5	1.72939e-66	95.06	3	P:GO:0006629; F:GO:0008168; P:GO:0009058	P:lipid metabolic process; F:methyltransferase activity; P:biosynthetic process	EC:2.1.1.103	Phosphoethanolamine N-methyltransferase	IPR041698 (PFAM); G3DSA:3.40.50.150 (GENE3D); IPR025771 (PTHR44307:PANTHER); PTHR44307 (PANTHER); cd02440 (CDD); IPR029063 (SUPERFAMILY)	F:GO:0000234; P:GO:0006656	F:phosphoethanolamine N-methyltransferase activity; P:phosphatidylcholine biosynthetic process
[INTERPRO, NO-BLAST]	GFTW01028010.1	---NA---	307									no IPS match	no IPS match	no IPS match
[INTERPRO, NO-BLAST]	GFTW01028558.1	---NA---	1188									mobidb-lite (MOBIDB_LITE); mobidb-lite (MOBIDB_LITE)	no GO terms	no GO terms
[INTERPRO, BLASTED, GO-SLIM]	GFTW01028754.1	AT2G46680.1	1238	20	8.79602e-33	72.91	6	F:GO:0003677; F:GO:0003700; C:GO:0005622; P:GO:0009058; C:GO:0032991; P:GO:0034641	F:DNA binding; F:DNA-binding transcription factor activity; C:intracellular; P:biosynthetic process; C:protein-containing complex; P:cellular nitrogen compound metabolic process			IPR000047 (PRINTS); IPR001356 (SMART); G3DSA:1.10.10.60 (GENE3D); IPR001356 (PFAM); IPR003106 (PFAM); mobidb-lite (MOBIDB_LITE); mobidb-lite (MOBIDB_LITE); PTHR24326 (PANTHER); PTHR24326:SF122 (PANTHER); IPR001356 (PROSITE_PROFILES); IPR001356 (CDD); IPR009057 (SUPERFAMILY)	F:GO:0003677; F:GO:0003700; P:GO:0006355; F:GO:0043565	F:DNA binding; F:DNA-binding transcription factor activity; P:regulation of transcription, DNA-templated; F:sequence-specific DNA binding; p:response to water deprivation
[INTERPRO, BLASTED]	GFTW01030562.1	AT1G73540.1	243	5	2.33613e-08	73.49						no IPS match	no IPS match	no IPS match
[INTERPRO, NO-BLAST]	GFTW01030804.1	---NA---	329									no IPS match	no IPS match	no IPS match
[INTERPRO, BLASTED, GO-SLIM]	GFTW01032161.1	AT5G53460.1	533	20	6.88426e-65	71.79	1	F:GO:0003674	F:molecular_function			IPR009051 (G3DSA:1.10.1060.GENE3D); IPR028261 (PFAM); PTHR11938:SF133 (PANTHER); PTHR11938 (PANTHER); IPR009051 (SUPERFAMILY)	F:GO:0051536	F:iron-sulfur cluster binding
[INTERPRO, BLASTED, GO-SLIM]	GFTW01032587.1	AT3G18000.1	323	5	3.59085e-13	96.25	3	P:GO:0006629; F:GO:0008168; P:GO:0009058	P:lipid metabolic process; F:methyltransferase activity; P:biosynthetic process	EC:2.1.1.103	Phosphoethanolamine N-methyltransferase	PTHR44307 (PANTHER); IPR025771 (PTHR44307:PANTHER)	F:GO:0000234; P:GO:0006656	F:phosphoethanolamine N-methyltransferase activity; P:phosphatidylcholine biosynthetic process
[INTERPRO, NO-BLAST]	GFTW01034390.1	---NA---	528									no IPS match	no IPS match	no IPS match
[INTERPRO, BLASTED]	GFTW01034866.1	AT5G27930.1	631	20	2.54511e-36	76.19						no IPS match	no IPS match	no IPS match
[INTERPRO, NO-BLAST]	GFTW01035163.1	---NA---	318									no IPS match	no IPS match	no IPS match
[INTERPRO, BLASTED]	GFTW01035988.1	AT3G18000.1	323	5	2.78083e-16	93.91						no IPS match	no IPS match	no IPS match
[INTERPRO, NO-BLAST]	GFTW01038850.1	---NA---	741									mobidb-lite (MOBIDB_LITE)	no GO terms	no GO terms
[INTERPRO, BLASTED]	GFTW01039337.1	AT1G67910.2	525	7	5.75019e-12	83.28						mobidb-lite (MOBIDB_LITE); mobidb-lite (MOBIDB_LITE); mobidb-lite (MOBIDB_LITE); PTHR33132:SF29 (PANTHER); PTHR33132 (PANTHER)	no GO terms	no GO terms
[INTERPRO, BLASTED, GO-SLIM]	GFTW01039923.1	AT2G38290.1	1851	7	0	51.82	2	C:GO:0005575; F:GO:0022857	C:cellular_component; F:transmembrane transporter activity			IPR002229 (PRINTS); IPR001905 (TIGRFAM); IPR029020 (G3DSA:1.10.3430.GENE3D); IPR024041 (PFAM); PTHR43029:SF25 (PANTHER); PTHR43029 (PANTHER); SSF111352 (SUPERFAMILY)	F:GO:0008519; P:GO:0015696; C:GO:0016020; P:GO:0072488	F:ammonium transmembrane transporter activity; P:ammonium transport; C:membrane; P:ammonium transmembrane transport
[INTERPRO, BLASTED, GO-SLIM]	GFTW01040893.1	AT3G47370.3	544	9	1.06098e-44	72.27	4	F:GO:0003735; C:GO:0005840; P:GO:0006412; P:GO:0042254	F:structural constituent of ribosome; C:ribosome; P:translation; P:ribosome biogenesis			IPR001848 (PRINTS); IPR027486 (SMART); IPR027486 (PFAM); IPR005729 (TIGRFAM); IPR036838 (G3DSA:3.30.70.GENE3D); IPR001848 (PANTHER); PTHR11700:SF8 (PANTHER); IPR001848 (HAMAP); IPR036838 (SUPERFAMILY)	F:GO:0003735; C:GO:0005840; P:GO:0006412; C:GO:0015935	F:structural constituent of ribosome; C:ribosome; P:translation; C:small ribosomal subunit
[INTERPRO, BLASTED, GO-SLIM]	GFTW01041179.1	AT1G10970.1	1706	19	9.85761e-113	64.54	2	C:GO:0005575; F:GO:0022857	C:cellular_component; F:transmembrane transporter activity			IPR004698 (TIGRFAM); IPR003689 (PFAM); PTHR11040 (PANTHER); PTHR11040:SF163 (PANTHER)	F:GO:0005385; C:GO:0016020; C:GO:0016021; P:GO:0030001; F:GO:0046873; P:GO:0055085; P:GO:0071577	F:zinc ion transmembrane transporter activity; C:membrane; C:integral component of membrane; P:metal ion transport; F:metal ion transmembrane transporter activity; P:transmembrane transport; P:zinc ion transmembrane transport
[INTERPRO, NO-BLAST]	GFTW01041322.1	---NA---	241									no IPS match	no IPS match	no IPS match
[INTERPRO, BLASTED]	GFTW01041594.1	AT2G32240.1	1242	10	1.92257e-23	51.03						mobidb-lite (MOBIDB_LITE); mobidb-lite (MOBIDB_LITE); mobidb-lite (MOBIDB_LITE); mobidb-lite (MOBIDB_LITE); PTHR43049:SF1 (PANTHER); PTHR43049 (PANTHER)	no GO terms	no GO terms
[INTERPRO, BLASTED, GO-SLIM]	GFTW01041780.1	AT4G13550.3	479	3	5.75532e-33	89.25	1	P:GO:0006629	P:lipid metabolic process			IPR029058 (G3DSA:3.40.50.GENE3D); IPR002921 (PFAM); PTHR47759 (PANTHER); IPR029058 (SUPERFAMILY)	P:GO:0006629	P:lipid metabolic process
[INTERPRO, BLASTED, GO-SLIM]	GFTW01042244.1	AT3G01420.1	1081	5	1.09958e-159	71.19	2	P:GO:0006950; F:GO:0016491	P:response to stress; F:oxidoreductase activity	EC:1.11.1.7	Peroxidase	IPR037120 (G3DSA:1.10.640.GENE3D); IPR019791 (PFAM); PTHR11903:SF26 (PANTHER); PTHR11903 (PANTHER); IPR019791 (PROSITE_PROFILES); IPR010255 (SUPERFAMILY)	F:GO:0004601; P:GO:0006979; F:GO:0020037; P:GO:0055114	F:peroxidase activity; P:response to oxidative stress; F:heme binding; P:oxidation-reduction process
[INTERPRO, NO-BLAST]	GFTW01043266.1	---NA---	707									no IPS match	no IPS match	no IPS match
[INTERPRO, NO-BLAST]	GFTW01044029.1	---NA---	477									no IPS match	no IPS match	no IPS match
[INTERPRO, BLASTED]	GFTW01044267.1	AT4G03510.3	1074	20	9.36164e-36	57.99						IPR001841 (SMART); IPR027370 (PFAM); IPR013083 (G3DSA:3.30.40.GENE3D); mobidb-lite (MOBIDB_LITE); mobidb-lite (MOBIDB_LITE); PTHR12313:SF59 (PANTHER); PTHR12313 (PANTHER); IPR001841 (PROSITE_PROFILES); cd16745 (CDD); SSF57850 (SUPERFAMILY)	no GO terms	no GO terms
[INTERPRO, NO-BLAST]	GFTW01044281.1	---NA---	271									no IPS match	no IPS match	no IPS match
[INTERPRO, BLASTED, GO-SLIM]	GFTW01045487.1	AT4G14320.1	566	3	4.01532e-51	88.06	4	F:GO:0003735; C:GO:0005840; P:GO:0006412; P:GO:0042254	F:structural constituent of ribosome; C:ribosome; P:translation; P:ribosome biogenesis			G3DSA:3.10.450.80 (GENE3D); IPR000552 (PFAM); IPR000552 (PANTHER); PTHR10369:SF34 (PANTHER); IPR000552 (PRODOM); IPR011332 (SUPERFAMILY)	F:GO:0003735; C:GO:0005840; P:GO:0006412	F:structural constituent of ribosome; C:ribosome; P:translation
[INTERPRO, NO-BLAST]	GFTW01045934.1	---NA---	659									mobidb-lite (MOBIDB_LITE); mobidb-lite (MOBIDB_LITE); mobidb-lite (MOBIDB_LITE)	no GO terms	no GO terms
[INTERPRO, BLASTED, GO-SLIM]	GFTW01046266.1	AT4G29890.1	1479	1	1.56125e-31	44.07	2	F:GO:0016491; F:GO:0043167	F:oxidoreductase activity; F:ion binding			IPR001663 (PRINTS); IPR015879 (PFAM); IPR036922 (G3DSA:2.102.10.GENE3D); G3DSA:3.90.380.10 (GENE3D); IPR017941 (PFAM); G3DSA:3.90.380.10 (GENE3D); PTHR43756 (PANTHER); IPR017941 (PROSITE_PROFILES); cd03469 (CDD); cd00680 (CDD); IPR036922 (SUPERFAMILY); SSF55961 (SUPERFAMILY)	F:GO:0005506; F:GO:0016491; P:GO:0044237; F:GO:0051537; P:GO:0055114	F:iron ion binding; F:oxidoreductase activity; P:cellular metabolic process; F:2 iron, 2 sulfur cluster binding; P:oxidation-reduction process
[INTERPRO, BLASTED, MAPPED, GO-SLIM]	GFTW01047815.1	AT1G22380.1	1968	20	1.16538e-102	53.81	1	F:GO:0016757	F:transferase activity, transferring glycosyl groups			G3DSA:3.40.50.2000 (GENE3D); IPR002213 (PFAM); G3DSA:3.40.50.2000 (GENE3D); PTHR11926 (PANTHER); SSF53756 (SUPERFAMILY)	F:GO:0016758	F:transferase activity, transferring hexosyl groups
[INTERPRO, BLASTED]	GFTW01048038.1	AT5G04410.1	528	5	0.000222617	74.55						no IPS match	no IPS match	no IPS match
[INTERPRO, BLASTED, GO-SLIM]	GFTW01048353.1	AT2G26690.1	1980	20	0	64.48	2	C:GO:0005575; F:GO:0022857	C:cellular_component; F:transmembrane transporter activity			IPR000109 (PFAM); G3DSA:1.20.1250.20 (GENE3D); IPR000109 (PANTHER); PTHR11654:SF401 (PANTHER); IPR036259 (SUPERFAMILY)	C:GO:0016020; F:GO:0022857; P:GO:0055085	C:membrane; F:transmembrane transporter activity; P:transmembrane transport
[INTERPRO, NO-BLAST]	GFTW01048398.1	---NA---	255									no IPS match	no IPS match	no IPS match
[INTERPRO, BLASTED, GO-SLIM]	GFTW01049000.1	AT5G53460.1	1435	6	0	81.16	3	P:GO:0006520; P:GO:0009058; F:GO:0016491	P:cellular amino acid metabolic process; P:biosynthetic process; F:oxidoreductase activity			IPR006982 (PFAM); IPR002932 (PFAM); IPR013785 (G3DSA:3.20.20.GENE3D); IPR013785 (G3DSA:3.20.20.GENE3D); mobidb-lite (MOBIDB_LITE); PTHR11938:SF131 (PANTHER); PTHR11938 (PANTHER); IPR002932 (CDD); SSF51395 (SUPERFAMILY)	F:GO:0003824; P:GO:0006537; P:GO:0006807; F:GO:0015930; F:GO:0016638; P:GO:0055114	F:catalytic activity; P:glutamate biosynthetic process; P:nitrogen compound metabolic process; F:glutamate synthase activity; F:oxidoreductase activity, acting on the CH-NH2 group of donors; P:oxidation-reduction process
[INTERPRO, BLASTED, GO-SLIM]	GFTW01049285.1	AT2G32080.2	1538	2	6.41579e-147	86.99	1	F:GO:0003677	F:DNA binding			IPR006628 (SMART); IPR006628 (PFAM); G3DSA:3.10.450.700 (GENE3D); IPR006628 (PANTHER)	F:GO:0000977; F:GO:0032422	F:RNA polymerase II regulatory region sequence-specific DNA binding; F:purine-rich negative regulatory element binding
[INTERPRO, BLASTED]	GFTW01050314.1	AT1G76360.1	374	1	8.45637e-05	75.76						mobidb-lite (MOBIDB_LITE); mobidb-lite (MOBIDB_LITE); mobidb-lite (MOBIDB_LITE)	no GO terms	no GO terms
[INTERPRO, BLASTED]	GFTW01051010.1	AT1G73600.2	254	5	2.73895e-19	56.19						no IPS match	no IPS match	no IPS match
[INTERPRO, BLASTED, GO-SLIM]	GFTW01052296.1	AT4G10960.1	1259	20	0	66.11	4	P:GO:0005975; F:GO:0016853; P:GO:0034641; P:GO:0044281	P:carbohydrate metabolic process; F:isomerase activity; P:cellular nitrogen compound metabolic process; P:small molecule metabolic process	EC:5.1.3.2	UDP-glucose 4-epimerase	G3DSA:3.90.25.10 (GENE3D); IPR005886 (TIGRFAM); IPR016040 (PFAM); G3DSA:3.40.50.720 (GENE3D); PTHR43725:SF17 (PANTHER); PTHR43725 (PANTHER); IPR005886 (CDD); IPR036291 (SUPERFAMILY)	F:GO:0003978; P:GO:0006012	F:UDP-glucose 4-epimerase activity; P:galactose metabolic process
[INTERPRO, BLASTED]	GFTW01052405.1	AT4G10265.1	658	2	9.41188e-05	88.8						IPR022251 (PFAM)	no GO terms	no GO terms
[INTERPRO, NO-BLAST]	GFTW01053140.1	---NA---	816									mobidb-lite (MOBIDB_LITE)	no GO terms	no GO terms
[INTERPRO, BLASTED, GO-SLIM]	GFTW01053350.1	AT1G78080.1	1920	20	9.2222e-59	67.72	6	F:GO:0003677; F:GO:0003700; C:GO:0005622; P:GO:0009058; C:GO:0032991; P:GO:0034641	F:DNA binding; F:DNA-binding transcription factor activity; C:intracellular; P:biosynthetic process; C:protein-containing complex; P:cellular nitrogen compound metabolic process			IPR001471 (PRINTS); IPR001471 (SMART); IPR001471 (PFAM); IPR036955 (G3DSA:3.30.730.GENE3D); mobidb-lite (MOBIDB_LITE); mobidb-lite (MOBIDB_LITE); mobidb-lite (MOBIDB_LITE); PTHR31657 (PANTHER); PTHR31657:SF46 (PANTHER); IPR001471 (PROSITE_PROFILES); IPR001471 (CDD); IPR016177 (SUPERFAMILY)	F:GO:0003677; F:GO:0003700; P:GO:0006355	F:DNA binding; F:DNA-binding transcription factor activity; P:regulation of transcription, DNA-templated; p:response to water deprivation
[INTERPRO, BLASTED]	GFTW01053625.1	AT1G55775.1	719	17	6.05769e-13	60.17						G3DSA:3.30.70.100 (GENE3D); PTHR46371:SF9 (PANTHER); PTHR46371 (PANTHER)	no GO terms	no GO terms
[INTERPRO, BLASTED, GO-SLIM]	GFTW01054747.1	AT4G38470.2	2389	20	0	69.38	3	P:GO:0006464; F:GO:0016301; F:GO:0043167	P:cellular protein modification process; F:kinase activity; F:ion binding			IPR001245 (PRINTS); IPR000719 (SMART); G3DSA:3.30.200.20 (GENE3D); G3DSA:1.10.510.10 (GENE3D); IPR002912 (PFAM); IPR001245 (PFAM); mobidb-lite (MOBIDB_LITE); PTHR44329 (PANTHER); PTHR44329:SF104 (PANTHER); IPR002912 (PROSITE_PROFILES); IPR000719 (PROSITE_PROFILES); cd13999 (CDD); IPR011009 (SUPERFAMILY); SSF55021 (SUPERFAMILY)	F:GO:0004672; F:GO:0005524; P:GO:0006468	F:protein kinase activity; F:ATP binding; P:protein phosphorylation
[INTERPRO, BLASTED]	GFTW01054761.1	AT1G15010.1	844	2	6.45622e-13	61.99						PTHR33782 (PANTHER); PTHR33782:SF5 (PANTHER)	no GO terms	no GO terms
[INTERPRO, BLASTED]	GFTW01055107.1	AT3G24255.7	848	3	3.46506e-15	52.26						no IPS match	no IPS match	no IPS match
[INTERPRO, BLASTED]	GFTW01057084.1	AT4G35070.2	1038	20	1.02162e-34	52.44						IPR017066 (PIRSF); PF13920 (PFAM); IPR013083 (G3DSA:3.30.40.GENE3D); IPR017066 (PANTHER); PTHR42647:SF6 (PANTHER); IPR001841 (PROSITE_PROFILES)	no GO terms	no GO terms
[INTERPRO, NO-BLAST]	GFTW01057287.1	---NA---	647									no IPS match	no IPS match	no IPS match
[INTERPRO, NO-BLAST]	GFTW01057987.1	---NA---	286									no IPS match	no IPS match	no IPS match
[INTERPRO, NO-BLAST]	GFTW01059029.1	---NA---	570									no IPS match	no IPS match	no IPS match
[INTERPRO, BLASTED]	GFTW01059599.1	AT4G34555.1	528	6	7.89457e-14	67.18						IPR004977 (PFAM); G3DSA:1.10.10.2780 (GENE3D); mobidb-lite (MOBIDB_LITE); IPR004977 (PANTHER); PTHR12850:SF5 (PANTHER); IPR004977 (PRODOM); IPR036390 (SUPERFAMILY)	no GO terms	no GO terms
[INTERPRO, BLASTED, GO-SLIM]	GFTW01059906.1	AT4G01470.1	966	20	3.89314e-137	63.95	2	C:GO:0005575; F:GO:0022857	C:cellular_component; F:transmembrane transporter activity			IPR000425 (PRINTS); IPR023271 (G3DSA:1.20.1080.GENE3D); IPR000425 (PFAM); PTHR45665:SF21 (PANTHER); IPR034294 (PANTHER); IPR000425 (CDD); IPR023271 (SUPERFAMILY)	F:GO:0015267; C:GO:0016020; P:GO:0055085	F:channel activity; C:membrane; P:transmembrane transport
[INTERPRO, NO-BLAST]	GFTW01059955.1	---NA---	249									no IPS match	no IPS match	no IPS match
[INTERPRO, NO-BLAST]	GFTW01060681.1	---NA---	502									no IPS match	no IPS match	no IPS match
[INTERPRO, BLASTED]	GFTW01060819.1	AT5G14020.6	676	7	5.64337e-07	72.09						IPR038499 (G3DSA:1.25.40.GENE3D); PTHR23032:SF2 (PANTHER); IPR038898 (PANTHER)	no GO terms	no GO terms
[INTERPRO, BLASTED, GO-SLIM]	GFTW01061310.1	AT2G27300.1	1770	20	1.68442e-82	66.72	3	F:GO:0003677; P:GO:0009058; P:GO:0034641	F:DNA binding; P:biosynthetic process; P:cellular nitrogen compound metabolic process			IPR003441 (PFAM); IPR036093 (G3DSA:3.30.310.GENE3D); mobidb-lite (MOBIDB_LITE); mobidb-lite (MOBIDB_LITE); mobidb-lite (MOBIDB_LITE); mobidb-lite (MOBIDB_LITE); PTHR31989:SF236 (PANTHER); PTHR31989 (PANTHER); IPR003441 (PROSITE_PROFILES); IPR036093 (SUPERFAMILY)	F:GO:0003677; P:GO:0006355	F:DNA binding; P:regulation of transcription, DNA-templated
[INTERPRO, NO-BLAST]	GFTW01061907.1	---NA---	228									mobidb-lite (MOBIDB_LITE)	no GO terms	no GO terms
[INTERPRO, BLASTED, MAPPED]	GFTW01062215.1	AT4G00300.1	2137	20	2.4369e-113	50.77	3	F:GO:0004672; F:GO:0005524; P:GO:0006468	F:protein kinase activity; F:ATP binding; P:protein phosphorylation			IPR024788 (PFAM); G3DSA:2.60.120.430 (GENE3D); PTHR34590 (PANTHER); PTHR34590:SF6 (PANTHER)	no GO terms	no GO terms
[INTERPRO, BLASTED]	GFTW01062522.1	AT3G14280.1	727	1	5.6773e-12	63.49						PTHR34206 (PANTHER); PTHR34206:SF1 (PANTHER)	no GO terms	no GO terms
[INTERPRO, BLASTED]	GFTW01062568.1	AT4G10960.1	535	10	8.46931e-35	70.84						IPR016040 (PFAM); G3DSA:3.90.25.10 (GENE3D); PTHR43725 (PANTHER); PTHR43725:SF23 (PANTHER); IPR036291 (SUPERFAMILY)	no GO terms	no GO terms
[INTERPRO, BLASTED, GO-SLIM]	GFTW01063234.1	AT1G70530.2	576	20	1.45626e-24	65	3	P:GO:0006464; F:GO:0016301; F:GO:0043167	P:cellular protein modification process; F:kinase activity; F:ion binding			IPR000719 (PFAM); G3DSA:3.30.200.20 (GENE3D); PTHR27006 (PANTHER); PTHR27006:SF195 (PANTHER); IPR002902 (PROSITE_PROFILES); IPR000719 (PROSITE_PROFILES); IPR011009 (SUPERFAMILY)	F:GO:0004672; F:GO:0005524; P:GO:0006468	F:protein kinase activity; F:ATP binding; P:protein phosphorylation
[INTERPRO, BLASTED, GO-SLIM]	GFTW01065143.1	AT4G00430.1	1081	20	0	87.92	2	C:GO:0005575; F:GO:0022857	C:cellular_component; F:transmembrane transporter activity			IPR000425 (PRINTS); IPR000425 (TIGRFAM); IPR023271 (G3DSA:1.20.1080.GENE3D); IPR000425 (PFAM); IPR034294 (PANTHER); PTHR45687:SF4 (PANTHER); IPR000425 (CDD); IPR023271 (SUPERFAMILY)	F:GO:0015267; C:GO:0016020; P:GO:0055085	F:channel activity; C:membrane; P:transmembrane transport
[INTERPRO, BLASTED, GO-SLIM]	GFTW01065210.1	AT4G24770.2	1789	20	1.5361e-26	53.18	1	F:GO:0003674	F:molecular_function			IPR000504 (SMART); IPR000504 (PFAM); IPR012677 (G3DSA:3.30.70.GENE3D); mobidb-lite (MOBIDB_LITE); mobidb-lite (MOBIDB_LITE); mobidb-lite (MOBIDB_LITE); mobidb-lite (MOBIDB_LITE); mobidb-lite (MOBIDB_LITE); mobidb-lite (MOBIDB_LITE); mobidb-lite (MOBIDB_LITE); PTHR23236:SF9 (PANTHER); PTHR23236 (PANTHER); IPR000504 (PROSITE_PROFILES); IPR000504 (PROSITE_PROFILES); IPR034276 (CDD); IPR035979 (SUPER…	F:GO:0003676	F:nucleic acid binding
[INTERPRO, NO-BLAST]	GFTW01065452.1	---NA---	657									no IPS match	no IPS match	no IPS match
[INTERPRO, NO-BLAST]	GFTW01065812.1	---NA---	986									no IPS match	no IPS match	no IPS match
[INTERPRO, BLASTED, GO-SLIM]	GFTW01066341.1	AT3G61110.1	717	5	8.79046e-37	76.13	4	F:GO:0003735; C:GO:0005840; P:GO:0006412; P:GO:0042254	F:structural constituent of ribosome; C:ribosome; P:translation; P:ribosome biogenesis			IPR000592 (PFAM); G3DSA:2.20.25.640 (GENE3D); IPR000592 (PANTHER); IPR000592 (PRODOM); IPR000592 (HAMAP); IPR011332 (SUPERFAMILY)	F:GO:0003735; C:GO:0005840; P:GO:0006412	F:structural constituent of ribosome; C:ribosome; P:translation
[INTERPRO, BLASTED, GO-SLIM]	GFTW01066466.1	AT5G47560.1	2034	1	0	86.06	3	F:GO:0003674; C:GO:0005575; P:GO:0055085	F:molecular_function; C:cellular_component; P:transmembrane transport			IPR001898 (TIGRFAM); IPR001898 (PFAM); PTHR10283 (PANTHER); PTHR10283:SF127 (PANTHER); cd01115 (CDD)	F:GO:0005215; C:GO:0016020; P:GO:0055085	F:transporter activity; C:membrane; P:transmembrane transport
[INTERPRO, BLASTED]	GFTW01066771.1	AT1G21000.1	1147	20	3.21026e-105	65.86						IPR006734 (PFAM); mobidb-lite (MOBIDB_LITE); mobidb-lite (MOBIDB_LITE); PTHR31065 (PANTHER); PTHR31065:SF38 (PANTHER)	no GO terms	no GO terms
[INTERPRO, BLASTED]	GFTW01066798.1	AT4G24020.1	967	20	5.24046e-23	53.76						PTHR32002 (PANTHER); PTHR32002:SF35 (PANTHER)	no GO terms	no GO terms
[INTERPRO, BLASTED, GO-SLIM]	GFTW01066810.1	AT1G01060.4	1746	20	1.66846e-28	74.82	1	F:GO:0003677	F:DNA binding			G3DSA:1.10.10.60 (GENE3D); mobidb-lite (MOBIDB_LITE); mobidb-lite (MOBIDB_LITE); mobidb-lite (MOBIDB_LITE); mobidb-lite (MOBIDB_LITE); mobidb-lite (MOBIDB_LITE); mobidb-lite (MOBIDB_LITE); PTHR12802 (PANTHER); PTHR12802:SF109 (PANTHER); IPR017930 (PROSITE_PROFILES); IPR001005 (CDD); IPR009057 (SUPERFAMILY)	F:GO:0003677	F:DNA binding; P:regulation of transcription, DNA-templated; circadian regulator
[INTERPRO, NO-BLAST]	GFTW01067773.1	---NA---	380									mobidb-lite (MOBIDB_LITE)	no GO terms	no GO terms
[INTERPRO, BLASTED]	GFTW01068538.1	AT3G61220.1	761	13	3.57849e-56	61.88						IPR002347 (PRINTS); G3DSA:3.40.50.720 (GENE3D); PTHR43490:SF84 (PANTHER); PTHR43490 (PANTHER); IPR036291 (SUPERFAMILY)	no GO terms	no GO terms
[INTERPRO, BLASTED, GO-SLIM]	GFTW01068963.1	AT4G21760.2	938	20	2.21916e-66	63.24	2	P:GO:0005975; F:GO:0016798	P:carbohydrate metabolic process; F:hydrolase activity, acting on glycosyl bonds			IPR001360 (PRINTS); G3DSA:3.20.20.80 (GENE3D); IPR001360 (PFAM); PTHR10353:SF153 (PANTHER); IPR001360 (PANTHER); IPR017853 (SUPERFAMILY)	F:GO:0004553; P:GO:0005975	F:hydrolase activity, hydrolyzing O-glycosyl compounds; P:carbohydrate metabolic process
[INTERPRO, BLASTED]	GFTW01069651.1	AT5G38760.1	950	1	5.86818e-06	92.86						mobidb-lite (MOBIDB_LITE); mobidb-lite (MOBIDB_LITE); IPR039624 (PANTHER); PTHR34191:SF5 (PANTHER)	no GO terms	no GO terms
[INTERPRO, NO-BLAST]	GFTW01069956.1	---NA---	404									no IPS match	no IPS match	no IPS match
[INTERPRO, BLASTED, GO-SLIM]	GFTW01070035.1	AT4G37760.1	1896	12	0	74.42	5	C:GO:0005575; P:GO:0006629; P:GO:0009058; F:GO:0016491; F:GO:0043167	C:cellular_component; P:lipid metabolic process; P:biosynthetic process; F:oxidoreductase activity; F:ion binding	EC:1.14.13.132; EC:1.14.13	Acting on paired donors, with incorporation or reduction of molecular oxygen. The oxygen incorporated need not be derived from O(2); Acting on paired donors, with incorporation or reduction of molecular oxygen. The oxygen incorporated need not be derived from O(2)	PR00420 (PRINTS); PF13450 (PFAM); IPR036188 (G3DSA:3.50.50.GENE3D); G3DSA:3.30.9.50 (GENE3D); IPR013698 (PFAM); IPR040125 (PANTHER); PTHR10835:SF4 (PANTHER); IPR036188 (SUPERFAMILY)	F:GO:0004506; C:GO:0016021; P:GO:0016126; F:GO:0050660; P:GO:0055114	F:squalene monooxygenase activity; C:integral component of membrane; P:sterol biosynthetic process; F:flavin adenine dinucleotide binding; P:oxidation-reduction process
[INTERPRO, BLASTED, GO-SLIM]	GFTW01071338.1	AT5G49740.1	2567	20	0	58.54	1	F:GO:0016491	F:oxidoreductase activity			G3DSA:2.40.30.10 (GENE3D); IPR039261 (G3DSA:3.40.50.GENE3D); IPR013112 (PFAM); IPR013121 (PFAM); IPR013130 (PFAM); PTHR11972 (PANTHER); PTHR11972:SF69 (PANTHER); IPR017927 (PROSITE_PROFILES); cd06186 (CDD); IPR039261 (SUPERFAMILY); IPR017938 (SUPERFAMILY)	F:GO:0016491; P:GO:0055114	F:oxidoreductase activity; P:oxidation-reduction process
[INTERPRO, NO-BLAST]	GFTW01072889.1	---NA---	1496									IPR027915 (PFAM); mobidb-lite (MOBIDB_LITE); mobidb-lite (MOBIDB_LITE); mobidb-lite (MOBIDB_LITE); mobidb-lite (MOBIDB_LITE); mobidb-lite (MOBIDB_LITE); mobidb-lite (MOBIDB_LITE); IPR027915 (PANTHER)	no GO terms	no GO terms
[INTERPRO, BLASTED, GO-SLIM]	GFTW01073253.1	AT2G02240.1	1172	20	1.26447e-57	52.2	1	F:GO:0003674	F:molecular_function			IPR025886 (PFAM); PTHR32278:SF43 (PANTHER); PTHR32278 (PANTHER); IPR036047 (SUPERFAMILY)	F:GO:0005515	F:protein binding
[INTERPRO, BLASTED]	GFTW01073480.1	AT3G17030.1	2113	1	0	70.56						IPR035203 (PFAM); IPR035200 (PFAM); IPR035201 (PFAM); G3DSA:2.40.50.140 (GENE3D); PTHR36033 (PANTHER); IPR012340 (SUPERFAMILY); IPR012340 (SUPERFAMILY)	no GO terms	no GO terms
[INTERPRO, BLASTED]	GFTW01074272.1	AT1G80160.2	1100	7	4.84364e-33	79.46						IPR029068 (G3DSA:3.10.180.GENE3D); PTHR46142 (PANTHER); PTHR46142:SF9 (PANTHER); IPR029068 (SUPERFAMILY)	no GO terms	no GO terms
[INTERPRO, BLASTED]	GFTW01076160.1	AT3G03170.1	1254	9	2.10893e-10	67.53						mobidb-lite (MOBIDB_LITE); mobidb-lite (MOBIDB_LITE); mobidb-lite (MOBIDB_LITE); mobidb-lite (MOBIDB_LITE); PTHR33172:SF29 (PANTHER); PTHR33172 (PANTHER)	no GO terms	no GO terms
[INTERPRO, BLASTED, GO-SLIM]	GFTW01076236.1	AT1G22780.1	702	3	7.28621e-80	88.96	5	F:GO:0003723; F:GO:0003735; C:GO:0005840; P:GO:0006412; P:GO:0042254	F:RNA binding; F:structural constituent of ribosome; C:ribosome; P:translation; P:ribosome biogenesis			IPR001892 (PIRSF); G3DSA:1.10.8.50 (GENE3D); IPR027437 (G3DSA:4.10.910.GENE3D); IPR001892 (PFAM); mobidb-lite (MOBIDB_LITE); PTHR10871 (PANTHER); PTHR10871:SF3 (PANTHER); IPR001892 (HAMAP); IPR001892 (PROSITE_PROFILES); IPR010979 (SUPERFAMILY)	F:GO:0003676; F:GO:0003723; F:GO:0003735; C:GO:0005840; P:GO:0006412	F:nucleic acid binding; F:RNA binding; F:structural constituent of ribosome; C:ribosome; P:translation
[INTERPRO, NO-BLAST]	GFTW01077376.1	---NA---	1511									no IPS match	no IPS match	no IPS match
[INTERPRO, BLASTED, GO-SLIM]	GFTW01077811.1	AT5G56780.1	1531	3	1.44409e-83	54.23	3	F:GO:0003677; P:GO:0009058; P:GO:0034641	F:DNA binding; P:biosynthetic process; P:cellular nitrogen compound metabolic process			PTHR35133:SF1 (PANTHER); PTHR35133:SF1 (PANTHER); IPR038909 (PANTHER); IPR038909 (PANTHER)	F:GO:0003677; P:GO:0006355	F:DNA binding; P:regulation of transcription, DNA-templated
[INTERPRO, NO-BLAST]	GFTW01077815.1	---NA---	716									no IPS match	no IPS match	no IPS match
[INTERPRO, NO-BLAST]	GFTW01077868.1	---NA---	709									no IPS match	no IPS match	no IPS match
[INTERPRO, BLASTED, GO-SLIM]	GFTW01078709.1	AT2G21320.1	871	20	7.37714e-73	59.14	1	F:GO:0043167	F:ion binding			IPR000315 (SMART); IPR000315 (PFAM); G3DSA:3.30.40.200 (GENE3D); mobidb-lite (MOBIDB_LITE); mobidb-lite (MOBIDB_LITE); mobidb-lite (MOBIDB_LITE); PTHR31832 (PANTHER); PTHR31832:SF5 (PANTHER); IPR000315 (PROSITE_PROFILES); IPR000315 (CDD); IPR000315 (CDD)	F:GO:0008270	F:zinc ion binding; p: regulation of transcription
[INTERPRO, BLASTED, GO-SLIM]	GFTW01079528.1	AT4G05150.1	2196	20	1.1701e-44	75.6	1	F:GO:0003674	F:molecular_function			IPR000270 (PFAM); mobidb-lite (MOBIDB_LITE); mobidb-lite (MOBIDB_LITE); mobidb-lite (MOBIDB_LITE); PTHR31066 (PANTHER); PTHR31066:SF33 (PANTHER); SSF54277 (SUPERFAMILY)	F:GO:0005515	F:protein binding; P:protein phosphorylation
[INTERPRO, BLASTED, GO-SLIM]	GFTW01080018.1	AT3G53420.2	1175	20	1.215e-168	83.33	2	C:GO:0005575; F:GO:0022857	C:cellular_component; F:transmembrane transporter activity			IPR000425 (PRINTS); IPR000425 (TIGRFAM); IPR000425 (PFAM); IPR023271 (G3DSA:1.20.1080.GENE3D); PTHR45687:SF2 (PANTHER); IPR034294 (PANTHER); IPR000425 (CDD); IPR023271 (SUPERFAMILY)	F:GO:0015267; C:GO:0016020; P:GO:0055085	F:channel activity; C:membrane; P:transmembrane transport
[INTERPRO, BLASTED, GO-SLIM]	GFTW01080337.1	AT3G13790.1	2171	20	0	68.54	2	P:GO:0005975; F:GO:0016798	P:carbohydrate metabolic process; F:hydrolase activity, acting on glycosyl bonds			IPR001362 (SMART); IPR013148 (PFAM); G3DSA:2.60.120.560 (GENE3D); IPR023296 (G3DSA:2.115.10.GENE3D); IPR013189 (PFAM); PTHR31953:SF16 (PANTHER); PTHR31953 (PANTHER); IPR013148 (CDD); IPR023296 (SUPERFAMILY); IPR013320 (SUPERFAMILY)	F:GO:0004553; P:GO:0005975	F:hydrolase activity, hydrolyzing O-glycosyl compounds; P:carbohydrate metabolic process
[INTERPRO, BLASTED, GO-SLIM]	GFTW01080756.1	AT4G23160.2	4339	6	4.94177e-90	63.08	3	F:GO:0003674; C:GO:0005634; P:GO:0006259	F:molecular_function; C:nucleus; P:DNA metabolic process			IPR025724 (PFAM); IPR001584 (PFAM); IPR013103 (PFAM); IPR036397 (G3DSA:3.30.420.GENE3D); mobidb-lite (MOBIDB_LITE); mobidb-lite (MOBIDB_LITE); mobidb-lite (MOBIDB_LITE); IPR039537 (PANTHER); IPR039537 (PANTHER); PTHR11439:SF273 (PANTHER); PTHR11439:SF273 (PANTHER); IPR001584 (PROSITE_PROFILES); SSF56672 (SUPERFAMILY); IPR012337 (SUPERFAMILY)	C:GO:0000943; F:GO:0003676; P:GO:0015074	C:retrotransposon nucleocapsid; F:nucleic acid binding; P:DNA integration
[INTERPRO, BLASTED, GO-SLIM]	GFTW01080848.1	AT5G17860.1	2000	7	2.62398e-154	64.84	2	C:GO:0005575; P:GO:0055085	C:cellular_component; P:transmembrane transport			G3DSA:1.20.1420.30 (GENE3D); IPR004837 (PFAM); PTHR12266:SF12 (PANTHER); PTHR12266 (PANTHER)	C:GO:0016021; P:GO:0055085	C:integral component of membrane; P:transmembrane transport
[INTERPRO, BLASTED, GO-SLIM]	GFTW01081792.1	AT1G19220.1	3266	20	0	78.61	4	F:GO:0003677; C:GO:0005634; P:GO:0009058; P:GO:0034641	F:DNA binding; C:nucleus; P:biosynthetic process; P:cellular nitrogen compound metabolic process			IPR003340 (SMART); G3DSA:3.10.20.90 (GENE3D); IPR015300 (G3DSA:2.40.330.GENE3D); IPR010525 (PFAM); G3DSA:2.30.30.1040 (GENE3D); IPR003340 (PFAM); IPR033389 (PFAM); mobidb-lite (MOBIDB_LITE); mobidb-lite (MOBIDB_LITE); mobidb-lite (MOBIDB_LITE); mobidb-lite (MOBIDB_LITE); mobidb-lite (MOBIDB_LITE); PTHR31384 (PANTHER); PTHR31384:SF21 (PANTHER); PTHR31384 (PANTHER); PTHR31384:SF21 (PANTHER); IPR003…	F:GO:0003677; F:GO:0005515; C:GO:0005634; P:GO:0006355; P:GO:0009725	F:DNA binding; F:protein binding; C:nucleus; P:regulation of transcription, DNA-templated; P:response to hormone
[INTERPRO, NO-BLAST]	GFTW01084905.1	---NA---	962									no IPS match	no IPS match	no IPS match
[INTERPRO, BLASTED, GO-SLIM]	GFTW01085521.1	AT3G06010.1	3614	20	0	65.57	2	F:GO:0042393; F:GO:0043167	F:histone binding; F:ion binding			IPR029295 (SMART); IPR014001 (SMART); IPR001650 (SMART); IPR029295 (PFAM); IPR038718 (G3DSA:3.40.50.GENE3D); G3DSA:3.40.50.300 (GENE3D); IPR000330 (PFAM); IPR001650 (PFAM); mobidb-lite (MOBIDB_LITE); mobidb-lite (MOBIDB_LITE); mobidb-lite (MOBIDB_LITE); mobidb-lite (MOBIDB_LITE); mobidb-lite (MOBIDB_LITE); PTHR10799 (PANTHER); PTHR10799:SF854 (PANTHER); IPR001650 (PROSITE_PROFILES); IPR014001 (PR…	F:GO:0005524; F:GO:0042393	F:ATP binding; F:histone binding; p:response to water deprivation; p:chromatin remodeler
[INTERPRO, NO-BLAST]	GFTW01086281.1	---NA---	925									no IPS match	no IPS match	no IPS match
[INTERPRO, NO-BLAST]	GFTW01086702.1	---NA---	3951									no IPS match	no IPS match	no IPS match
[INTERPRO, BLASTED]	GFTW01086736.1	AT2G32240.1	252	1	9.0779e-12	73.17						mobidb-lite (MOBIDB_LITE); PTHR43049 (PANTHER); PTHR43049:SF1 (PANTHER)	no GO terms	no GO terms
[INTERPRO, NO-BLAST]	GFTW01086738.1	---NA---	613									mobidb-lite (MOBIDB_LITE); PTHR43049 (PANTHER); PTHR43049:SF1 (PANTHER)	no GO terms	no GO terms
[INTERPRO, BLASTED]	GFTW01086742.1	AT2G32240.1	479	10	1.49235e-24	53.7						mobidb-lite (MOBIDB_LITE); mobidb-lite (MOBIDB_LITE); PTHR43049:SF1 (PANTHER); PTHR43049 (PANTHER)	no GO terms	no GO terms
[INTERPRO, BLASTED, GO-SLIM]	GFTW01087469.1	AT1G01060.4	657	20	1.10562e-41	82.58	1	F:GO:0003677	F:DNA binding			IPR001005 (SMART); G3DSA:1.10.10.60 (GENE3D); IPR001005 (PFAM); IPR006447 (TIGRFAM); mobidb-lite (MOBIDB_LITE); PTHR12802:SF109 (PANTHER); PTHR12802 (PANTHER); IPR017930 (PROSITE_PROFILES); IPR001005 (CDD); IPR009057 (SUPERFAMILY)	F:GO:0003677	F:DNA binding; P:regulation of transcription, DNA-templated; circadian regulator
[INTERPRO, BLASTED, GO-SLIM]	GFTW01087470.1	AT1G01060.4	581	20	4.72218e-42	82.58	1	F:GO:0003677	F:DNA binding			IPR001005 (SMART); G3DSA:1.10.10.60 (GENE3D); IPR001005 (PFAM); IPR006447 (TIGRFAM); mobidb-lite (MOBIDB_LITE); PTHR12802:SF109 (PANTHER); PTHR12802 (PANTHER); IPR017930 (PROSITE_PROFILES); IPR001005 (CDD); IPR009057 (SUPERFAMILY)	F:GO:0003677	F:DNA binding; P:regulation of transcription, DNA-templated; circadian regulator
[INTERPRO, BLASTED]	GFTW01087587.1	AT4G10380.1	889	1	0.000876325	74.19						no IPS match	no IPS match	no IPS match
[INTERPRO, BLASTED]	GFTW01089795.1	AT2G39570.1	1735	2	0	70.84						G3DSA:3.30.70.260 (GENE3D); IPR040217 (PANTHER); PTHR31096:SF14 (PANTHER); IPR002912 (PROSITE_PROFILES); IPR002912 (PROSITE_PROFILES); SSF55021 (SUPERFAMILY); SSF55021 (SUPERFAMILY)	no GO terms	no GO terms
[INTERPRO, NO-BLAST]	GFTW01090409.1	---NA---	608									no IPS match	no IPS match	no IPS match
[INTERPRO, NO-BLAST]	GFTW01091405.1	---NA---	318									no IPS match	no IPS match	no IPS match
[INTERPRO, BLASTED, MAPPED, GO-SLIM]	GFTW01092541.1	AT1G18580.1	1977	20	0	62.55	5	C:GO:0005794; P:GO:0005975; F:GO:0016757; P:GO:0034641; P:GO:0044281	C:Golgi apparatus; P:carbohydrate metabolic process; F:transferase activity, transferring glycosyl groups; P:cellular nitrogen compound metabolic process; P:small molecule metabolic process	EC:2.4.1.43	Polygalacturonate 4-alpha-galacturonosyltransferase	IPR029044 (G3DSA:3.90.550.GENE3D); IPR002495 (PFAM); IPR029993 (PANTHER); PTHR32116:SF20 (PANTHER); cd06429 (CDD); IPR029044 (SUPERFAMILY)	F:GO:0016757; F:GO:0047262	F:transferase activity, transferring glycosyl groups; F:polygalacturonate 4-alpha-galacturonosyltransferase activity
[INTERPRO, BLASTED, GO-SLIM]	GFTW01093277.1	AT5G15710.2	1546	5	3.03028e-17	40.92	1	F:GO:0003674	F:molecular_function			IPR001810 (SMART); G3DSA:1.20.1280.50 (GENE3D); IPR015915 (G3DSA:2.120.10.GENE3D); IPR017451 (TIGRFAM); IPR001810 (PFAM); PTHR46301:SF17 (PANTHER); PTHR46301 (PANTHER); IPR015915 (SUPERFAMILY); IPR036047 (SUPERFAMILY)	F:GO:0005515	F:protein binding
[INTERPRO, BLASTED, GO-SLIM]	GFTW01093618.1	AT4G27290.2	1623	20	0	63.65	4	P:GO:0000003; P:GO:0006464; F:GO:0016301; F:GO:0043167	P:reproduction; P:cellular protein modification process; F:kinase activity; F:ion binding			IPR003609 (SMART); IPR000719 (SMART); G3DSA:3.30.200.20 (GENE3D); IPR000858 (PFAM); G3DSA:1.10.510.10 (GENE3D); IPR003609 (PFAM); IPR001245 (PFAM); PTHR27006 (PANTHER); PTHR27006:SF207 (PANTHER); IPR000719 (PROSITE_PROFILES); IPR003609 (PROSITE_PROFILES); cd01098 (CDD); SSF57414 (SUPERFAMILY); IPR011009 (SUPERFAMILY)	F:GO:0004672; F:GO:0005524; P:GO:0006468; P:GO:0048544	F:protein kinase activity; F:ATP binding; P:protein phosphorylation; P:recognition of pollen
[INTERPRO, NO-BLAST]	GFTW01094294.1	---NA---	710									no IPS match	no IPS match	no IPS match
[INTERPRO, NO-BLAST]	GFTW01094745.1	---NA---	330									no IPS match	no IPS match	no IPS match
[INTERPRO, NO-BLAST]	GFTW01094749.1	---NA---	613									no IPS match	no IPS match	no IPS match
[INTERPRO, BLASTED]	GFTW01095032.1	AT2G28130.1	1573	1	2.50163e-78	66.26						IPR026161 (PFAM); mobidb-lite (MOBIDB_LITE); PTHR37212 (PANTHER)	no GO terms	no GO terms
[INTERPRO, BLASTED]	GFTW01096193.1	AT3G24255.3	1610	5	2.12928e-11	39.97						IPR026960 (PFAM); PTHR47746 (PANTHER); PTHR47746:SF11 (PANTHER)	no GO terms	no GO terms
[INTERPRO, BLASTED]	GFTW01096938.1	AT1G74310.2	624	4	1.13288e-06	92.39						no IPS match	no IPS match	no IPS match
[INTERPRO, BLASTED, GO-SLIM]	GFTW01098720.1	AT1G72820.2	1342	20	1.87198e-131	50.31	1	F:GO:0022857	F:transmembrane transporter activity			IPR002067 (PRINTS); IPR018108 (PFAM); IPR023395 (G3DSA:1.50.40.GENE3D); PTHR46080:SF4 (PANTHER); PTHR46080 (PANTHER); IPR018108 (PROSITE_PROFILES); IPR018108 (PROSITE_PROFILES); IPR018108 (PROSITE_PROFILES); IPR023395 (SUPERFAMILY)	F:GO:0022857; P:GO:0055085	F:transmembrane transporter activity; P:transmembrane transport
[INTERPRO, BLASTED]	GFTW01099013.1	AT3G61220.1	804	20	5.66681e-61	56.16						IPR002347 (PRINTS); IPR002347 (PFAM); G3DSA:3.40.50.720 (GENE3D); PTHR43490 (PANTHER); PTHR43490:SF84 (PANTHER); IPR036291 (SUPERFAMILY)	no GO terms	no GO terms
[INTERPRO, BLASTED, GO-SLIM]	GFTW01099147.1	AT3G09600.7	1425	20	3.39639e-121	74.67	1	F:GO:0003677	F:DNA binding			IPR001005 (SMART); IPR001005 (PFAM); G3DSA:1.10.10.60 (GENE3D); IPR006447 (TIGRFAM); mobidb-lite (MOBIDB_LITE); mobidb-lite (MOBIDB_LITE); mobidb-lite (MOBIDB_LITE); PTHR12802 (PANTHER); PTHR12802:SF115 (PANTHER); IPR017930 (PROSITE_PROFILES); IPR001005 (CDD); IPR009057 (SUPERFAMILY)	F:GO:0003677	F:DNA binding; P:regulation of transcription, DNA-templated; p:circadian regulator
[INTERPRO, BLASTED, GO-SLIM]	GFTW01099219.1	AT4G16280.3	2855	7	1.84196e-15	71.89	1	F:GO:0003674	F:molecular_function			IPR012677 (G3DSA:3.30.70.GENE3D); IPR000504 (PFAM); mobidb-lite (MOBIDB_LITE); mobidb-lite (MOBIDB_LITE); PTHR15241:SF259 (PANTHER); PTHR15241 (PANTHER); IPR000504 (PROSITE_PROFILES); IPR035979 (SUPERFAMILY)	F:GO:0003676	F:nucleic acid binding; P:regulation of flower development
[INTERPRO, BLASTED]	GFTW01099450.1	AT1G64050.2	3099	2	5.10191e-29	46.9						mobidb-lite (MOBIDB_LITE); mobidb-lite (MOBIDB_LITE); mobidb-lite (MOBIDB_LITE); mobidb-lite (MOBIDB_LITE); PTHR36723 (PANTHER)	no GO terms	no GO terms
[INTERPRO, BLASTED]	GFTW01100075.1	AT4G19160.1	469	4	3.49289e-66	80.14						mobidb-lite (MOBIDB_LITE); PTHR31350 (PANTHER); PTHR31350:SF19 (PANTHER)	no GO terms	no GO terms
[INTERPRO, BLASTED]	GFTW01100079.1	AT4G19160.1	385	4	1.97435e-36	88.2						PTHR31350 (PANTHER); PTHR31350:SF19 (PANTHER)	no GO terms	no GO terms
[INTERPRO, BLASTED, GO-SLIM]	GFTW01100995.1	AT4G19040.1	2803	20	0	64.93	1	F:GO:0008289	F:lipid binding			IPR023393 (G3DSA:3.30.530.GENE3D); IPR009769 (PFAM); IPR002913 (PFAM); mobidb-lite (MOBIDB_LITE); mobidb-lite (MOBIDB_LITE); mobidb-lite (MOBIDB_LITE); PTHR12136 (PANTHER); PTHR12136:SF104 (PANTHER); IPR002913 (PROSITE_PROFILES); cd00177 (CDD); SSF55961 (SUPERFAMILY)	F:GO:0008289	F:lipid binding
[INTERPRO, BLASTED, GO-SLIM]	GFTW01101459.1	AT4G31950.1	880	20	3.84482e-81	59.21	2	F:GO:0016491; F:GO:0043167	F:oxidoreductase activity; F:ion binding			IPR002401 (PRINTS); IPR001128 (PRINTS); IPR001128 (PFAM); IPR036396 (G3DSA:1.10.630.GENE3D); PTHR24303 (PANTHER); IPR036396 (SUPERFAMILY)	F:GO:0005506; F:GO:0016705; F:GO:0020037; P:GO:0055114	F:iron ion binding; F:oxidoreductase activity, acting on paired donors, with incorporation or reduction of molecular oxygen; F:heme binding; P:oxidation-reduction process
[INTERPRO, BLASTED]	GFTW01102802.1	AT3G55760.2	1731	5	0	68.98						mobidb-lite (MOBIDB_LITE); mobidb-lite (MOBIDB_LITE); mobidb-lite (MOBIDB_LITE); PTHR34113:SF3 (PANTHER); PTHR34113 (PANTHER)	no GO terms	no GO terms
[INTERPRO, BLASTED]	GFTW01102968.1	AT2G38640.1	1192	20	8.57692e-69	52						IPR007612 (PFAM); IPR038595 (G3DSA:3.20.90.GENE3D); IPR007612 (PANTHER); PTHR31087:SF22 (PANTHER); IPR025659 (SUPERFAMILY)	no GO terms	no GO terms
[INTERPRO, BLASTED, GO-SLIM]	GFTW01103139.1	AT1G15460.1	536	20	9.11149e-51	84.21	2	C:GO:0005575; F:GO:0022857	C:cellular_component; F:transmembrane transporter activity			IPR011531 (PFAM); IPR003020 (PANTHER); PTHR11453:SF94 (PANTHER)	F:GO:0005452; P:GO:0006820; C:GO:0016020; C:GO:0016021	F:inorganic anion exchanger activity; P:anion transport; C:membrane; C:integral component of membrane
[INTERPRO, BLASTED, GO-SLIM]	GFTW01103310.1	AT2G28320.1	2482	20	0	54.86	1	F:GO:0008289	F:lipid binding			IPR001849 (SMART); IPR002913 (SMART); IPR011993 (G3DSA:2.30.29.GENE3D); IPR002913 (PFAM); IPR009769 (PFAM); IPR023393 (G3DSA:3.30.530.GENE3D); PTHR12136:SF41 (PANTHER); PTHR12136 (PANTHER); IPR001849 (PROSITE_PROFILES); IPR002913 (PROSITE_PROFILES); cd00177 (CDD); cd00821 (CDD); SSF55961 (SUPERFAMILY); SSF50729 (SUPERFAMILY)	F:GO:0008289	F:lipid binding
[INTERPRO, BLASTED, GO-SLIM]	GFTW01105331.1	AT4G27290.1	1120	20	4.87039e-112	57.83	1	P:GO:0000003	P:reproduction			IPR003609 (SMART); IPR003609 (PFAM); IPR000858 (PFAM); PTHR32444:SF41 (PANTHER); PTHR32444 (PANTHER); IPR003609 (PROSITE_PROFILES); cd01098 (CDD); IPR036426 (SUPERFAMILY); SSF57414 (SUPERFAMILY)	P:GO:0048544	P:recognition of pollen
[INTERPRO, NO-BLAST]	GFTW01107290.1	---NA---	1518									no IPS match	no IPS match	no IPS match
[INTERPRO, BLASTED]	GFTW01108116.1	AT3G44480.5	476	13	2.96208e-06	52.74						IPR032675 (G3DSA:3.80.10.GENE3D); PTHR34630 (PANTHER); PTHR34630:SF15 (PANTHER); PTHR34630:SF15 (PANTHER); PTHR34630 (PANTHER); SSF52047 (SUPERFAMILY)	no GO terms	no GO terms
[INTERPRO, BLASTED]	GFTW01108117.1	AT3G14460.1	1144	20	2.86539e-06	44.94						IPR032675 (G3DSA:3.80.10.GENE3D); IPR032675 (G3DSA:3.80.10.GENE3D); PTHR34630:SF15 (PANTHER); PTHR34630 (PANTHER); PTHR34630:SF15 (PANTHER); SSF52047 (SUPERFAMILY)	no GO terms	no GO terms
[INTERPRO, NO-BLAST]	GFTW01108156.1	---NA---	394									no IPS match	no IPS match	no IPS match
[INTERPRO, BLASTED]	GFTW01109045.1	AT3G53830.1	566	5	9.22066e-21	67.88						PTHR22870:SF382 (PANTHER); PTHR22870 (PANTHER)	no GO terms	no GO terms
[INTERPRO, BLASTED, GO-SLIM]	GFTW01109530.1	AT4G34660.1	1463	6	1.79061e-101	67.78	1	F:GO:0003674	F:molecular_function			IPR001452 (SMART); IPR027267 (G3DSA:1.20.1270.GENE3D); G3DSA:2.30.30.40 (GENE3D); IPR001452 (PFAM); PTHR14167:SF75 (PANTHER); PTHR14167 (PANTHER); IPR001452 (PROSITE_PROFILES); IPR027267 (SUPERFAMILY); IPR036028 (SUPERFAMILY)	F:GO:0005515	F:protein binding
[INTERPRO, NO-BLAST]	GFTW01109770.1	---NA---	790									no IPS match	no IPS match	no IPS match
[INTERPRO, BLASTED, GO-SLIM]	GFTW01109911.1	AT5G64170.1	1805	11	5.39241e-48	55.15	2	P:GO:0009058; P:GO:0034641	P:biosynthetic process; P:cellular nitrogen compound metabolic process			mobidb-lite (MOBIDB_LITE); mobidb-lite (MOBIDB_LITE); mobidb-lite (MOBIDB_LITE); mobidb-lite (MOBIDB_LITE); mobidb-lite (MOBIDB_LITE); mobidb-lite (MOBIDB_LITE); mobidb-lite (MOBIDB_LITE); IPR039928 (PANTHER); PTHR33334:SF8 (PANTHER)	P:GO:0006355; P:GO:0007623	P:regulation of transcription, DNA-templated; P:circadian rhythm
[INTERPRO, BLASTED, GO-SLIM]	GFTW01110585.1	AT5G20380.2	1851	18	0	56.16	2	C:GO:0005575; P:GO:0055085	C:cellular_component; P:transmembrane transport			G3DSA:1.20.1250.20 (GENE3D); IPR011701 (PFAM); G3DSA:1.20.1250.20 (GENE3D); PTHR11662:SF243 (PANTHER); PTHR11662 (PANTHER); IPR020846 (PROSITE_PROFILES); IPR020846 (CDD); IPR036259 (SUPERFAMILY)	C:GO:0016021; P:GO:0055085	C:integral component of membrane; P:transmembrane transport
[INTERPRO, BLASTED, GO-SLIM]	GFTW01110695.1	AT1G01490.2	977	10	3.61636e-24	73.77	2	P:GO:0006810; F:GO:0043167	P:transport; F:ion binding			IPR006121 (PFAM); G3DSA:3.30.70.100 (GENE3D); mobidb-lite (MOBIDB_LITE); mobidb-lite (MOBIDB_LITE); PTHR45811:SF36 (PANTHER); PTHR45811 (PANTHER); IPR036163 (SUPERFAMILY)	P:GO:0030001; F:GO:0046872	P:metal ion transport; F:metal ion binding
[INTERPRO, BLASTED, GO-SLIM]	GFTW01111015.1	AT5G18670.1	1996	15	0	56.03	3	P:GO:0005975; P:GO:0009056; F:GO:0016798	P:carbohydrate metabolic process; P:catabolic process; F:hydrolase activity, acting on glycosyl bonds	EC:3.2.1.2	Beta-amylase	IPR001554 (PRINTS); G3DSA:3.20.20.80 (GENE3D); IPR001554 (PFAM); IPR001554 (PANTHER); PTHR31352:SF3 (PANTHER); IPR017853 (SUPERFAMILY)	P:GO:0000272; F:GO:0016161	P:polysaccharide catabolic process; F:beta-amylase activity
[INTERPRO, NO-BLAST]	GFTW01111242.1	---NA---	669									no IPS match	no IPS match	no IPS match
[INTERPRO, NO-BLAST]	GFTW01111271.1	---NA---	526									mobidb-lite (MOBIDB_LITE); mobidb-lite (MOBIDB_LITE); mobidb-lite (MOBIDB_LITE)	no GO terms	no GO terms
[INTERPRO, BLASTED, GO-SLIM]	GFTW01111432.1	AT3G25990.1	668	7	1.0103e-41	68.98	1	F:GO:0003677	F:DNA binding			IPR001005 (SMART); PF13837 (PFAM); G3DSA:1.10.10.60 (GENE3D); mobidb-lite (MOBIDB_LITE); mobidb-lite (MOBIDB_LITE); PTHR21654:SF68 (PANTHER); PTHR21654 (PANTHER); IPR017877 (PROSITE_PROFILES); cd12203 (CDD); IPR009057 (SUPERFAMILY)	F:GO:0003677	F:DNA binding; P:regulation of transcription, DNA-templated
[INTERPRO, BLASTED, MAPPED, GO-SLIM]	GFTW01113122.1	AT3G11340.1	1132	20	4.37613e-97	57.71	1	F:GO:0016757	F:transferase activity, transferring glycosyl groups			IPR002213 (PFAM); G3DSA:3.40.50.2000 (GENE3D); G3DSA:3.40.50.2000 (GENE3D); PTHR11926 (PANTHER); SSF53756 (SUPERFAMILY)	F:GO:0016758	F:transferase activity, transferring hexosyl groups
[INTERPRO, NO-BLAST]	GFTW01113309.1	---NA---	309									no IPS match	no IPS match	no IPS match
[INTERPRO, NO-BLAST]	GFTW01114486.1	---NA---	267									no IPS match	no IPS match	no IPS match
[INTERPRO, NO-BLAST]	GFTW01115124.1	---NA---	485									mobidb-lite (MOBIDB_LITE)	no GO terms	no GO terms
[INTERPRO, BLASTED, GO-SLIM]	GFTW01115439.1	AT1G72820.2	2459	20	1.90007e-146	49.11	1	F:GO:0022857	F:transmembrane transporter activity			IPR002067 (PRINTS); IPR023395 (G3DSA:1.50.40.GENE3D); IPR018108 (PFAM); PTHR46080:SF4 (PANTHER); PTHR46080 (PANTHER); IPR018108 (PROSITE_PROFILES); IPR018108 (PROSITE_PROFILES); IPR018108 (PROSITE_PROFILES); IPR023395 (SUPERFAMILY)	F:GO:0022857; P:GO:0055085	F:transmembrane transporter activity; P:transmembrane transport
[INTERPRO, NO-BLAST]	GFTW01115519.1	---NA---	434									no IPS match	no IPS match	no IPS match
[INTERPRO, NO-BLAST]	GFTW01115990.1	---NA---	480									mobidb-lite (MOBIDB_LITE)	no GO terms	no GO terms
[INTERPRO, NO-BLAST]	GFTW01117459.1	---NA---	357									no IPS match	no IPS match	no IPS match
[INTERPRO, BLASTED]	GFTW01120061.1	AT5G37480.1	1319	2	0.000815566	64.1						no IPS match	no IPS match	no IPS match
[INTERPRO, BLASTED, GO-SLIM]	GFTW01120649.1	AT3G16780.1	1262	6	5.67587e-30	79.86	6	F:GO:0003723; F:GO:0003735; C:GO:0005829; C:GO:0005840; P:GO:0006412; P:GO:0042254	F:RNA binding; F:structural constituent of ribosome; C:cytosol; C:ribosome; P:translation; P:ribosome biogenesis			IPR000196 (SMART); G3DSA:1.10.1200.240 (GENE3D); IPR000196 (PFAM); mobidb-lite (MOBIDB_LITE); mobidb-lite (MOBIDB_LITE); IPR039547 (PANTHER); PTHR10722:SF17 (PANTHER); IPR035970 (SUPERFAMILY)	F:GO:0003723; F:GO:0003735; C:GO:0005840; P:GO:0006412; C:GO:0022625	F:RNA binding; F:structural constituent of ribosome; C:ribosome; P:translation; C:cytosolic large ribosomal subunit
[INTERPRO, BLASTED]	GFTW01120950.1	AT3G09600.8	1915	20	2.51314e-09	98.8						no IPS match	no IPS match	no IPS match
[INTERPRO, NO-BLAST]	GFTW01121945.1	---NA---	751									mobidb-lite (MOBIDB_LITE)	no GO terms	no GO terms
[INTERPRO, BLASTED]	GFTW01122652.1	AT3G14470.2	740	3	5.71855e-41	53.85						IPR032675 (G3DSA:3.80.10.GENE3D); PTHR23155 (PANTHER); PTHR23155:SF1066 (PANTHER); SSF52058 (SUPERFAMILY)	no GO terms	no GO terms
[INTERPRO, NO-BLAST]	GFTW01126349.1	---NA---	2833									mobidb-lite (MOBIDB_LITE); mobidb-lite (MOBIDB_LITE); mobidb-lite (MOBIDB_LITE); mobidb-lite (MOBIDB_LITE); mobidb-lite (MOBIDB_LITE); mobidb-lite (MOBIDB_LITE); mobidb-lite (MOBIDB_LITE); mobidb-lite (MOBIDB_LITE); mobidb-lite (MOBIDB_LITE); mobidb-lite (MOBIDB_LITE); mobidb-lite (MOBIDB_LITE); mobidb-lite (MOBIDB_LITE); mobidb-lite (MOBIDB_LITE); mobidb-lite (MOBIDB_LITE); mobidb-lite (MOBIDB_L…	no GO terms	no GO terms
[INTERPRO, NO-BLAST]	GFTW01127290.1	---NA---	553									no IPS match	no IPS match	no IPS match
[INTERPRO, NO-BLAST]	GFTW01129859.1	---NA---	3385									mobidb-lite (MOBIDB_LITE); mobidb-lite (MOBIDB_LITE); mobidb-lite (MOBIDB_LITE); mobidb-lite (MOBIDB_LITE); mobidb-lite (MOBIDB_LITE); mobidb-lite (MOBIDB_LITE); mobidb-lite (MOBIDB_LITE); mobidb-lite (MOBIDB_LITE); mobidb-lite (MOBIDB_LITE); mobidb-lite (MOBIDB_LITE); mobidb-lite (MOBIDB_LITE); mobidb-lite (MOBIDB_LITE); mobidb-lite (MOBIDB_LITE); mobidb-lite (MOBIDB_LITE); mobidb-lite (MOBIDB_L…	no GO terms	no GO terms
[INTERPRO, BLASTED]	GFTW01130629.1	AT3G24490.1	667	9	2.24632e-35	70.68						mobidb-lite (MOBIDB_LITE); mobidb-lite (MOBIDB_LITE); PTHR31307 (PANTHER); PTHR31307:SF8 (PANTHER)	no GO terms	no GO terms
[INTERPRO, NO-BLAST]	GFTW01131463.1	---NA---	295									no IPS match	no IPS match	no IPS match
[INTERPRO, BLASTED, GO-SLIM]	GFTW01131520.1	AT2G22400.1	2846	16	0	50.48	2	P:GO:0006399; F:GO:0008168	P:tRNA metabolic process; F:methyltransferase activity			IPR023267 (PRINTS); IPR023270 (PRINTS); IPR001678 (PFAM); mobidb-lite (MOBIDB_LITE); mobidb-lite (MOBIDB_LITE); mobidb-lite (MOBIDB_LITE); mobidb-lite (MOBIDB_LITE); mobidb-lite (MOBIDB_LITE); mobidb-lite (MOBIDB_LITE); PTHR22808:SF22 (PANTHER); PTHR22808 (PANTHER); IPR001678 (PROSITE_PROFILES); IPR029063 (SUPERFAMILY)	F:GO:0008168; F:GO:0016428	F:methyltransferase activity; F:tRNA (cytosine-5-)-methyltransferase activity
[INTERPRO, NO-BLAST]	GFTW01131767.1	---NA---	2624									mobidb-lite (MOBIDB_LITE); mobidb-lite (MOBIDB_LITE); mobidb-lite (MOBIDB_LITE); mobidb-lite (MOBIDB_LITE); mobidb-lite (MOBIDB_LITE); mobidb-lite (MOBIDB_LITE); mobidb-lite (MOBIDB_LITE); mobidb-lite (MOBIDB_LITE); mobidb-lite (MOBIDB_LITE); mobidb-lite (MOBIDB_LITE); mobidb-lite (MOBIDB_LITE); mobidb-lite (MOBIDB_LITE); mobidb-lite (MOBIDB_LITE); mobidb-lite (MOBIDB_LITE); mobidb-lite (MOBIDB_L…	no GO terms	no GO terms
[INTERPRO, BLASTED, GO-SLIM]	GFTW01131942.1	AT2G36380.1	584	20	1.64218e-106	86.2	2	F:GO:0016887; F:GO:0043167	F:ATPase activity; F:ion binding	EC:3.6.1.3; EC:3.6.1.15	Adenosinetriphosphatase; Nucleoside-triphosphate phosphatase	IPR003439 (PFAM); G3DSA:3.40.50.300 (GENE3D); PTHR19241 (PANTHER); PTHR19241:SF593 (PANTHER); IPR027417 (SUPERFAMILY)	F:GO:0005524; F:GO:0016887	F:ATP binding; F:ATPase activity
[INTERPRO, BLASTED, GO-SLIM]	GFTW01133257.1	AT2G24790.1	875	6	2.63809e-06	91.76	1	F:GO:0003674	F:molecular_function			IPR010402 (PFAM); PTHR31319:SF53 (PANTHER); PTHR31319 (PANTHER); IPR010402 (PROSITE_PROFILES)	F:GO:0005515	F:DNA binding; P:regulation of transcription, DNA-templated; circadian regulator
[INTERPRO, BLASTED, GO-SLIM]	GFTW01133258.1	AT5G57660.1	1422	20	8.08968e-51	63.77	1	F:GO:0043167	F:ion binding			IPR000315 (SMART); IPR010402 (PFAM); PTHR31319:SF53 (PANTHER); PTHR31319 (PANTHER); IPR010402 (PROSITE_PROFILES); IPR000315 (PROSITE_PROFILES); IPR000315 (PROSITE_PROFILES); IPR000315 (CDD); IPR000315 (CDD)	F:GO:0005515; F:GO:0008270	F:protein binding; F:zinc ion binding, regulation of flowering, cell-to-cell mobile; p:regulation of transcription
[INTERPRO, NO-BLAST]	GFTW01133777.1	---NA---	330									mobidb-lite (MOBIDB_LITE)	no GO terms	no GO terms
[INTERPRO, BLASTED]	GFTW01134239.1	AT5G66460.1	1236	1	0.000145142	67.65						no IPS match	no IPS match	no IPS match
[INTERPRO, BLASTED]	GFTW01136084.1	AT3G30390.1	1727	12	0	70.42						IPR013057 (PFAM); PTHR22950 (PANTHER); PTHR22950:SF511 (PANTHER)	no GO terms	no GO terms
[INTERPRO, BLASTED, GO-SLIM]	GFTW01138149.1	AT4G29210.1	2110	6	0	74.6	5	P:GO:0006790; F:GO:0008233; P:GO:0009056; P:GO:0034641; P:GO:0051186	P:sulfur compound metabolic process; F:peptidase activity; P:catabolic process; P:cellular nitrogen compound metabolic process; P:cofactor metabolic process	EC:3.4.19; EC:3.4.19.13	Acting on peptide bonds (peptidases); Glutathione hydrolase	PR01210 (PRINTS); G3DSA:1.10.246.130 (GENE3D); PF01019 (PFAM); IPR000101 (TIGRFAM); G3DSA:3.60.20.40 (GENE3D); IPR000101 (PANTHER); PTHR11686:SF34 (PANTHER); IPR029055 (SUPERFAMILY)	P:GO:0006751; F:GO:0036374	P:glutathione catabolic process; F:glutathione hydrolase activity
[INTERPRO, NO-BLAST]	GFTW01139276.1	---NA---	530									no IPS match	no IPS match	no IPS match
[INTERPRO, BLASTED]	GFTW01139334.1	AT1G33710.1	3191	1	2.71135e-05	50						IPR026960 (PFAM); PTHR47746 (PANTHER); PTHR47746:SF11 (PANTHER)	no GO terms	no GO terms
[INTERPRO, BLASTED, GO-SLIM]	GFTW01140466.1	AT3G47420.2	1857	10	7.58436e-132	75.88	2	C:GO:0005575; P:GO:0055085	C:cellular_component; P:transmembrane transport			IPR011701 (PFAM); G3DSA:1.20.1250.20 (GENE3D); mobidb-lite (MOBIDB_LITE); PTHR43184:SF15 (PANTHER); PTHR43184 (PANTHER); IPR020846 (PROSITE_PROFILES); IPR020846 (CDD); IPR036259 (SUPERFAMILY)	C:GO:0016021; P:GO:0055085	C:integral component of membrane; P:transmembrane transport
[INTERPRO, BLASTED, GO-SLIM]	GFTW01140467.1	AT3G47420.2	1858	10	0	78.68	2	C:GO:0005575; F:GO:0022857	C:cellular_component; F:transmembrane transporter activity			IPR000849 (PIRSF); IPR011701 (PFAM); G3DSA:1.20.1250.20 (GENE3D); G3DSA:1.20.1250.20 (GENE3D); mobidb-lite (MOBIDB_LITE); PTHR43184 (PANTHER); PTHR43184:SF15 (PANTHER); IPR020846 (PROSITE_PROFILES); IPR020846 (CDD); IPR036259 (SUPERFAMILY)	C:GO:0016021; F:GO:0022857; P:GO:0055085	C:integral component of membrane; F:transmembrane transporter activity; P:transmembrane transport
[INTERPRO, NO-BLAST]	GFTW01141202.1	---NA---	770									no IPS match	no IPS match	no IPS match
[INTERPRO, NO-BLAST]	GFTW01142087.1	---NA---	1138									no IPS match	no IPS match	no IPS match
[INTERPRO, BLASTED]	GFTW01142465.1	AT1G64530.1	1662	2	1.82061e-06	47.31						mobidb-lite (MOBIDB_LITE); PTHR32002:SF35 (PANTHER); PTHR32002 (PANTHER)	no GO terms	no GO terms
[INTERPRO, NO-BLAST]	GFTW01142922.1	---NA---	805									mobidb-lite (MOBIDB_LITE)	no GO terms	no GO terms
[INTERPRO, BLASTED, GO-SLIM]	GFTW01143219.1	AT4G31940.1	1904	20	2.62368e-157	55.25	2	F:GO:0016491; F:GO:0043167	F:oxidoreductase activity; F:ion binding			IPR002401 (PRINTS); IPR001128 (PRINTS); IPR001128 (PFAM); IPR036396 (G3DSA:1.10.630.GENE3D); PTHR24281 (PANTHER); IPR036396 (SUPERFAMILY)	F:GO:0005506; F:GO:0016705; F:GO:0020037; P:GO:0055114	F:iron ion binding; F:oxidoreductase activity, acting on paired donors, with incorporation or reduction of molecular oxygen; F:heme binding; P:oxidation-reduction process
[INTERPRO, BLASTED, GO-SLIM]	GFTW01144046.1	AT5G67200.1	2004	20	8.55206e-147	60.96	3	P:GO:0006464; F:GO:0016301; F:GO:0043167	P:cellular protein modification process; F:kinase activity; F:ion binding			G3DSA:1.10.510.10 (GENE3D); IPR000719 (PFAM); mobidb-lite (MOBIDB_LITE); mobidb-lite (MOBIDB_LITE); PTHR27008:SF260 (PANTHER); PTHR27008 (PANTHER); IPR000719 (PROSITE_PROFILES); IPR011009 (SUPERFAMILY)	F:GO:0004672; F:GO:0005524; P:GO:0006468	F:protein kinase activity; F:ATP binding; P:protein phosphorylation
[INTERPRO, BLASTED, GO-SLIM]	GFTW01144128.1	AT1G55150.1	1442	20	0	76.96	1	F:GO:0043167	F:ion binding			IPR001650 (SMART); IPR001650 (PFAM); G3DSA:3.40.50.300 (GENE3D); G3DSA:3.40.50.300 (GENE3D); IPR011545 (PFAM); mobidb-lite (MOBIDB_LITE); PTHR24031 (PANTHER); PTHR24031:SF683 (PANTHER); IPR001650 (PROSITE_PROFILES); IPR014001 (PROSITE_PROFILES); IPR001650 (CDD); IPR027417 (SUPERFAMILY)	F:GO:0003676; F:GO:0005524	F:nucleic acid binding; F:ATP binding p:nonsense-mediated decay
[INTERPRO, BLASTED, GO-SLIM]	GFTW01148651.1	AT5G64440.1	3326	1	1.85795e-50	53.02	4	P:GO:0006520; P:GO:0009056; F:GO:0016810; P:GO:0034641	P:cellular amino acid metabolic process; P:catabolic process; F:hydrolase activity, acting on carbon-nitrogen (but not peptide) bonds; P:cellular nitrogen compound metabolic process	EC:3.5.1.4	Amidase	PTHR11895:SF154 (PANTHER); IPR000120 (PANTHER)	F:GO:0004040	F:amidase activity
[INTERPRO, NO-BLAST]	GFTW01150864.1	---NA---	1376									mobidb-lite (MOBIDB_LITE); mobidb-lite (MOBIDB_LITE); mobidb-lite (MOBIDB_LITE); mobidb-lite (MOBIDB_LITE); PTHR37198 (PANTHER); PTHR37198:SF1 (PANTHER)	no GO terms	no GO terms
[INTERPRO, BLASTED]	GFTW01150865.1	AT1G65090.3	1656	3	1.25916e-11	63.73						mobidb-lite (MOBIDB_LITE); mobidb-lite (MOBIDB_LITE); mobidb-lite (MOBIDB_LITE); mobidb-lite (MOBIDB_LITE); PTHR37198 (PANTHER); PTHR37198:SF1 (PANTHER)	no GO terms	no GO terms
[INTERPRO, BLASTED]	GFTW01152218.1	AT1G19260.1	921	2	5.07634e-07	73.04						mobidb-lite (MOBIDB_LITE); mobidb-lite (MOBIDB_LITE)	no GO terms	no GO terms
[INTERPRO, BLASTED, GO-SLIM]	GFTW01152446.1	AT1G09530.3	458	20	1.57567e-50	77.54	1	F:GO:0003674	F:molecular_function			IPR011598 (SMART); IPR036638 (G3DSA:4.10.280.GENE3D); IPR011598 (PFAM); mobidb-lite (MOBIDB_LITE); mobidb-lite (MOBIDB_LITE); mobidb-lite (MOBIDB_LITE); PTHR46807:SF1 (PANTHER); PTHR46807 (PANTHER); IPR011598 (PROSITE_PROFILES); IPR011598 (CDD); IPR036638 (SUPERFAMILY)	F:GO:0046983	F:protein dimerization activity; P:regulation of transcription, DNA-templated; PIF3
[INTERPRO, BLASTED, GO-SLIM]	GFTW01153200.1	AT1G78950.2	2085	20	0	78.3	1	F:GO:0016853	F:isomerase activity			IPR032697 (PFAM); IPR032696 (PFAM); G3DSA:1.50.10.20 (GENE3D); IPR018333 (TIGRFAM); G3DSA:1.50.10.20 (GENE3D),SFLDG01016 (SFLD); PTHR11764:SF49 (PANTHER); PTHR11764 (PANTHER); IPR018333 (CDD); IPR008930 (SUPERFAMILY); IPR008930 (SUPERFAMILY)	F:GO:0016866	F:intramolecular transferase activity
[INTERPRO, BLASTED, GO-SLIM]	GFTW01153354.1	AT1G53730.1	2346	20	0	69.01	3	P:GO:0006464; F:GO:0016301; F:GO:0043167	P:cellular protein modification process; F:kinase activity; F:ion binding			IPR003591 (SMART); IPR013210 (PFAM); IPR032675 (G3DSA:3.80.10.GENE3D); IPR001245 (PFAM); G3DSA:3.30.200.20 (GENE3D); IPR001611 (PFAM); G3DSA:1.10.510.10 (GENE3D); mobidb-lite (MOBIDB_LITE); PTHR27008:SF162 (PANTHER); PTHR27008 (PANTHER); IPR000719 (PROSITE_PROFILES); SSF52058 (SUPERFAMILY); IPR011009 (SUPERFAMILY)	F:GO:0004672; F:GO:0005515; F:GO:0005524; P:GO:0006468	F:protein kinase activity; F:protein binding; F:ATP binding; P:protein phosphorylation
[INTERPRO, NO-BLAST]	GFTW01153589.1	---NA---	372									no IPS match	no IPS match	no IPS match
[INTERPRO, BLASTED, MAPPED, GO-SLIM]	GFTW01154049.1	AT1G11720.2	3804	19	0	59.36	2	P:GO:0005975; F:GO:0016757	P:carbohydrate metabolic process; F:transferase activity, transferring glycosyl groups	EC:2.4.1.11	Glycogen(starch) synthase	IPR005085 (SMART); IPR005085 (PFAM); G3DSA:3.40.50.2000 (GENE3D); IPR013534 (PFAM); IPR001296 (PFAM); G3DSA:3.40.50.2000 (GENE3D); mobidb-lite (MOBIDB_LITE); mobidb-lite (MOBIDB_LITE); mobidb-lite (MOBIDB_LITE); PTHR46083 (PANTHER); PTHR46083:SF5 (PANTHER); IPR011835 (HAMAP); cd03791 (CDD); SSF53756 (SUPERFAMILY)	F:GO:0004373; F:GO:2001070	F:glycogen (starch) synthase activity; F:starch binding
[INTERPRO, NO-BLAST]	GFTW01154975.1	---NA---	886									no IPS match	no IPS match	no IPS match
[INTERPRO, BLASTED, GO-SLIM]	GFTW01155588.1	AT4G37210.2	1111	2	1.43414e-85	70.38	1	F:GO:0003674	F:molecular_function			IPR019734 (SMART); IPR011990 (G3DSA:1.25.40.GENE3D); mobidb-lite (MOBIDB_LITE); mobidb-lite (MOBIDB_LITE); mobidb-lite (MOBIDB_LITE); mobidb-lite (MOBIDB_LITE); mobidb-lite (MOBIDB_LITE); PTHR15081 (PANTHER); PTHR15081:SF1 (PANTHER); IPR011990 (SUPERFAMILY); IPR011990 (SUPERFAMILY)	F:GO:0005515	F:protein binding
[INTERPRO, BLASTED, GO-SLIM]	GFTW01156117.1	AT4G23130.3	1252	20	2.63251e-65	52.87	3	P:GO:0006464; F:GO:0016301; F:GO:0043167	P:cellular protein modification process; F:kinase activity; F:ion binding			IPR001245 (PFAM); G3DSA:3.30.200.20 (GENE3D); IPR002902 (PFAM); IPR038408 (G3DSA:3.30.430.GENE3D); PTHR32099:SF38 (PANTHER); PTHR32099 (PANTHER); IPR002902 (PROSITE_PROFILES); IPR002902 (PROSITE_PROFILES); IPR000719 (PROSITE_PROFILES); IPR011009 (SUPERFAMILY)	F:GO:0004672; F:GO:0005524; P:GO:0006468	F:protein kinase activity; F:ATP binding; P:protein phosphorylation
[INTERPRO, BLASTED, GO-SLIM]	GFTW01156119.1	AT4G23180.1	1176	20	6.9554e-140	74.57	3	P:GO:0006464; F:GO:0016301; F:GO:0043167	P:cellular protein modification process; F:kinase activity; F:ion binding			IPR000719 (SMART); G3DSA:1.10.510.10 (GENE3D); G3DSA:3.30.200.20 (GENE3D); IPR001245 (PFAM); PIRSF000654 (PIRSF); PTHR27006 (PANTHER); PTHR27006:SF207 (PANTHER); IPR000719 (PROSITE_PROFILES); IPR011009 (SUPERFAMILY)	F:GO:0004672; F:GO:0005524; P:GO:0006468	F:protein kinase activity; F:ATP binding; P:protein phosphorylation
[INTERPRO, BLASTED, GO-SLIM]	GFTW01156120.1	AT4G23180.1	1595	20	8.26575e-85	71.86	3	P:GO:0006464; F:GO:0016301; F:GO:0043167	P:cellular protein modification process; F:kinase activity; F:ion binding			IPR000719 (SMART); G3DSA:1.10.510.10 (GENE3D); IPR001245 (PFAM); PTHR27006:SF207 (PANTHER); PTHR27006 (PANTHER); IPR000719 (PROSITE_PROFILES); IPR011009 (SUPERFAMILY)	F:GO:0004672; F:GO:0005524; P:GO:0006468	F:protein kinase activity; F:ATP binding; P:protein phosphorylation
[INTERPRO, BLASTED]	GFTW01157790.1	AT1G69523.1	339	4	6.67164e-10	65.17						no IPS match	no IPS match	no IPS match
[INTERPRO, NO-BLAST]	GFTW01159083.1	---NA---	761									IPR032675 (G3DSA:3.80.10.GENE3D); PTHR34630:SF15 (PANTHER); PTHR34630:SF15 (PANTHER); PTHR34630 (PANTHER); PTHR34630 (PANTHER); SSF52058 (SUPERFAMILY)	no GO terms	no GO terms
[INTERPRO, NO-BLAST]	GFTW01160064.1	---NA---	912									no IPS match	no IPS match	no IPS match
[INTERPRO, NO-BLAST]	GFTW01160090.1	---NA---	386									mobidb-lite (MOBIDB_LITE)	no GO terms	no GO terms
[INTERPRO, NO-BLAST]	GFTW01160974.1	---NA---	2168									no IPS match	no IPS match	no IPS match
[INTERPRO, BLASTED, GO-SLIM]	GFTW01161577.1	AT3G57230.4	1109	20	5.75091e-91	76.49	6	F:GO:0003677; F:GO:0003700; C:GO:0005634; P:GO:0009058; C:GO:0032991; P:GO:0034641	F:DNA binding; F:DNA-binding transcription factor activity; C:nucleus; P:biosynthetic process; C:protein-containing complex; P:cellular nitrogen compound metabolic process			IPR002100 (PRINTS); IPR002100 (SMART); IPR002100 (PFAM); IPR002487 (PFAM); IPR036879 (G3DSA:3.40.1810.GENE3D); PTHR11945 (PANTHER); PTHR11945:SF545 (PANTHER); IPR002100 (PROSITE_PROFILES); IPR002487 (PROSITE_PROFILES); IPR033896 (CDD); IPR036879 (SUPERFAMILY)	F:GO:0000977; F:GO:0003677; F:GO:0003700; C:GO:0005634; P:GO:0006355; P:GO:0045944; F:GO:0046983	F:RNA polymerase II regulatory region sequence-specific DNA binding; F:DNA binding; F:DNA-binding transcription factor activity; C:nucleus; P:regulation of transcription, DNA-templated; P:positive regulation of transcription by RNA polymerase II; F:protein dimerization activity; Regulation of flowering
[INTERPRO, BLASTED, GO-SLIM]	GFTW01165196.1	AT1G58030.1	771	16	2.6634e-110	69.94	2	C:GO:0005575; F:GO:0022857	C:cellular_component; F:transmembrane transporter activity			IPR002293 (PFAM); G3DSA:1.20.1740.10 (GENE3D); PTHR43243 (PANTHER); PTHR43243:SF15 (PANTHER)	C:GO:0016020; F:GO:0022857; P:GO:0055085	C:membrane; F:transmembrane transporter activity; P:transmembrane transport
[INTERPRO, BLASTED]	GFTW01165241.1	AT1G41920.1	406	8	1.3331e-21	66.11						PTHR11697 (PANTHER); PTHR11697:SF201 (PANTHER)	no GO terms	no GO terms
[INTERPRO, NO-BLAST]	GFTW01166736.1	---NA---	348									no IPS match	no IPS match	no IPS match
[INTERPRO, BLASTED, GO-SLIM]	GFTW01166770.1	AT3G55610.1	2376	6	0	87.06	3	P:GO:0006520; P:GO:0009058; F:GO:0016491	P:cellular amino acid metabolic process; P:biosynthetic process; F:oxidoreductase activity	EC:1.2.1.41	Glutamate-5-semialdehyde dehydrogenase	IPR001057 (PRINTS); IPR016162 (G3DSA:3.40.605.GENE3D); IPR016163 (G3DSA:3.40.309.GENE3D); IPR015590 (PFAM); IPR000965 (TIGRFAM); IPR036393 (G3DSA:3.40.1160.GENE3D); IPR001048 (PFAM); IPR005766 (TIGRFAM); IPR005766 (PIRSF); PTHR11063 (PANTHER); PTHR11063:SF18 (PANTHER); IPR000965 (HAMAP); IPR000965 (CDD); IPR036393 (SUPERFAMILY); IPR016161 (SUPERFAMILY)	F:GO:0003824; F:GO:0004350; P:GO:0006561; F:GO:0016491; F:GO:0016620; P:GO:0055114	F:catalytic activity; F:glutamate-5-semialdehyde dehydrogenase activity; P:proline biosynthetic process; F:oxidoreductase activity; F:oxidoreductase activity, acting on the aldehyde or oxo group of donors, NAD or NADP as acceptor; P:oxidation-reduction process
[INTERPRO, NO-BLAST]	GFTW01168072.1	---NA---	1839									mobidb-lite (MOBIDB_LITE); mobidb-lite (MOBIDB_LITE); mobidb-lite (MOBIDB_LITE)	no GO terms	no GO terms
[INTERPRO, NO-BLAST]	GFTW01168370.1	---NA---	2121									no IPS match	no IPS match	no IPS match
[INTERPRO, BLASTED]	GFTW01168473.1	AT1G64530.1	911	20	4.15779e-28	54.14						PTHR32002:SF35 (PANTHER); PTHR32002 (PANTHER)	no GO terms	no GO terms
[INTERPRO, NO-BLAST]	GFTW01168481.1	---NA---	606									mobidb-lite (MOBIDB_LITE); mobidb-lite (MOBIDB_LITE)	no GO terms	no GO terms
[INTERPRO, NO-BLAST]	GFTW01171131.1	---NA---	624									no IPS match	no IPS match	no IPS match
[INTERPRO, BLASTED]	GFTW01173257.1	AT5G47490.2	1279	5	7.82939e-110	73.08						IPR024298 (PFAM); mobidb-lite (MOBIDB_LITE); mobidb-lite (MOBIDB_LITE); mobidb-lite (MOBIDB_LITE); PTHR13402:SF17 (PANTHER); PTHR13402 (PANTHER)	no GO terms	no GO terms
[INTERPRO, NO-BLAST]	GFTW01176642.1	---NA---	2998									no IPS match	no IPS match	no IPS match
[INTERPRO, NO-BLAST]	GFTW01177259.1	---NA---	695									no IPS match	no IPS match	no IPS match
[INTERPRO, NO-BLAST]	GFTW01178382.1	---NA---	300									no IPS match	no IPS match	no IPS match
[INTERPRO, NO-BLAST]	GFTW01178772.1	---NA---	351									mobidb-lite (MOBIDB_LITE); mobidb-lite (MOBIDB_LITE)	no GO terms	no GO terms
[INTERPRO, BLASTED]	GFTW01178773.1	AT1G52240.1	2414	11	1.38632e-09	79.9						no IPS match	no IPS match	no IPS match
[INTERPRO, NO-BLAST]	GFTW01178826.1	---NA---	1150									no IPS match	no IPS match	no IPS match
[INTERPRO, BLASTED, MAPPED, GO-SLIM]	GFTW01179311.1	AT2G18700.1	1072	20	8.94542e-164	71.52	3	F:GO:0003674; P:GO:0005975; P:GO:0009058	F:molecular_function; P:carbohydrate metabolic process; P:biosynthetic process			IPR023214 (G3DSA:3.40.50.GENE3D); IPR003337 (PFAM); IPR001830 (PFAM); G3DSA:3.40.50.2000 (GENE3D); PTHR10788:SF46 (PANTHER); PTHR10788 (PANTHER); IPR036412 (SUPERFAMILY); SSF53756 (SUPERFAMILY)	F:GO:0003824; P:GO:0005992	F:catalytic activity; P:trehalose biosynthetic process
[INTERPRO, BLASTED, MAPPED, GO-SLIM]	GFTW01179313.1	AT2G18700.1	841	17	2.45158e-66	77.62	3	F:GO:0003674; P:GO:0005975; P:GO:0009058	F:molecular_function; P:carbohydrate metabolic process; P:biosynthetic process			IPR003337 (PFAM); IPR023214 (G3DSA:3.40.50.GENE3D); IPR003337 (TIGRFAM); PTHR10788:SF46 (PANTHER); PTHR10788 (PANTHER); IPR036412 (SUPERFAMILY)	F:GO:0003824; P:GO:0005992	F:catalytic activity; P:trehalose biosynthetic process
[INTERPRO, NO-BLAST]	GFTW01179512.1	---NA---	1164									no IPS match	no IPS match	no IPS match
[INTERPRO, NO-BLAST]	GFTW01179516.1	---NA---	449									no IPS match	no IPS match	no IPS match
[INTERPRO, BLASTED, GO-SLIM]	GFTW01180631.1	AT5G53460.1	7017	20	0	66.74	4	P:GO:0006520; P:GO:0009058; F:GO:0016491; F:GO:0043167	P:cellular amino acid metabolic process; P:biosynthetic process; F:oxidoreductase activity; F:ion binding	EC:1.4.1.14	Glutamate synthase (NADH)	PR00419 (PRINTS); IPR002932 (PFAM); IPR023753 (PFAM); IPR006005 (TIGRFAM); IPR036485 (G3DSA:2.160.20.GENE3D); IPR002489 (PFAM); IPR006982 (PFAM); IPR013785 (G3DSA:3.20.20.GENE3D); G3DSA:3.40.50.720 (GENE3D); IPR009051 (G3DSA:1.10.1060.GENE3D); IPR017932 (PFAM); IPR013785 (G3DSA:3.20.20.GENE3D); IPR028261 (PFAM); IPR029055 (G3DSA:3.60.20.GENE3D); IPR012220 (PIRSF); IPR036188 (G3DSA:3.50.50.GENE3D)…	F:GO:0003824; F:GO:0005506; P:GO:0006537; P:GO:0006807; F:GO:0010181; F:GO:0015930; F:GO:0016040; F:GO:0016491; F:GO:0016638; F:GO:0016639; F:GO:0050660; F:GO:0051536; P:GO:0055114	F:catalytic activity; F:iron ion binding; P:glutamate biosynthetic process; P:nitrogen compound metabolic process; F:FMN binding; F:glutamate synthase activity; F:glutamate synthase (NADH) activity; F:oxidoreductase activity; F:oxidoreductase activity, acting on the CH-NH2 group of donors; F:oxidoreductase activity, acting on the CH-NH2 group of donors, NAD or NADP as acceptor; F:flavin adenine d…
[INTERPRO, NO-BLAST]	GFTW01180697.1	---NA---	374									no IPS match	no IPS match	no IPS match
[INTERPRO, BLASTED, GO-SLIM]	GFTW01180952.1	AT2G46830.1	3613	20	1.91295e-61	69.65	1	F:GO:0003677	F:DNA binding			IPR001005 (SMART); IPR001005 (PFAM); G3DSA:1.10.10.60 (GENE3D); IPR006447 (TIGRFAM); mobidb-lite (MOBIDB_LITE); mobidb-lite (MOBIDB_LITE); mobidb-lite (MOBIDB_LITE); mobidb-lite (MOBIDB_LITE); mobidb-lite (MOBIDB_LITE); mobidb-lite (MOBIDB_LITE); mobidb-lite (MOBIDB_LITE); mobidb-lite (MOBIDB_LITE); PTHR12802 (PANTHER); PTHR12802:SF109 (PANTHER); IPR017930 (PROSITE_PROFILES); IPR001005 (CDD); IPR…	F:GO:0003677	F:DNA binding; P:regulation of transcription, DNA-templated; circadian regulator
[INTERPRO, NO-BLAST]	GFTW01180955.1	---NA---	305									no IPS match	no IPS match	no IPS match
[INTERPRO, BLASTED, GO-SLIM]	GFTW01180966.1	AT3G05050.1	5196	20	3.06752e-105	77.83	3	P:GO:0006464; F:GO:0016301; F:GO:0043167	P:cellular protein modification process; F:kinase activity; F:ion binding			G3DSA:1.10.510.10 (GENE3D); IPR000719 (PFAM); PIRSF000654 (PIRSF); G3DSA:3.30.200.20 (GENE3D); G3DSA:1.10.510.10 (GENE3D); PTHR24056 (PANTHER); PTHR24056:SF234 (PANTHER); IPR000719 (PROSITE_PROFILES); IPR000719 (PROSITE_PROFILES); IPR011009 (SUPERFAMILY); IPR011009 (SUPERFAMILY)	F:GO:0004672; F:GO:0005524; P:GO:0006468	F:protein kinase activity; F:ATP binding; P:protein phosphorylation
[INTERPRO, NO-BLAST]	GFTW01181457.1	---NA---	1197									no IPS match	no IPS match	no IPS match
[INTERPRO, BLASTED, GO-SLIM]	GFTW01181592.1	AT4G35520.8	4312	12	1.29349e-123	62.81	9	P:GO:0000003; F:GO:0003677; C:GO:0005622; P:GO:0006259; P:GO:0006950; P:GO:0007049; F:GO:0016887; C:GO:0032991; F:GO:0043167	P:reproduction; F:DNA binding; C:intracellular; P:DNA metabolic process; P:response to stress; P:cell cycle; F:ATPase activity; C:protein-containing complex; F:ion binding	EC:3.6.1.3; EC:3.6.1.15	Adenosinetriphosphatase; Nucleoside-triphosphate phosphatase	IPR014790 (SMART); IPR042120 (G3DSA:2.30.42.GENE3D); IPR013507 (PFAM); IPR014790 (PFAM); IPR042121 (G3DSA:3.30.1370.GENE3D); mobidb-lite (MOBIDB_LITE); IPR038973 (PANTHER); IPR028830 (PTHR10073:PANTHER); IPR020568 (SUPERFAMILY); IPR037198 (SUPERFAMILY)	F:GO:0005524; P:GO:0006298; P:GO:0007131; F:GO:0016887; F:GO:0030983; C:GO:0032300	F:ATP binding; P:mismatch repair; P:reciprocal meiotic recombination; F:ATPase activity; F:mismatched DNA binding; C:mismatch repair complex
[INTERPRO, BLASTED, GO-SLIM]	GFTW01181593.1	AT4G35520.8	4377	12	6.44888e-123	62.05	9	P:GO:0000003; F:GO:0003677; C:GO:0005622; P:GO:0006259; P:GO:0006950; P:GO:0007049; F:GO:0016887; C:GO:0032991; F:GO:0043167	P:reproduction; F:DNA binding; C:intracellular; P:DNA metabolic process; P:response to stress; P:cell cycle; F:ATPase activity; C:protein-containing complex; F:ion binding	EC:3.6.1.3; EC:3.6.1.15	Adenosinetriphosphatase; Nucleoside-triphosphate phosphatase	IPR014790 (SMART); IPR042121 (G3DSA:3.30.1370.GENE3D); IPR042120 (G3DSA:2.30.42.GENE3D); IPR013507 (PFAM); IPR014790 (PFAM); mobidb-lite (MOBIDB_LITE); IPR038973 (PANTHER); IPR028830 (PTHR10073:PANTHER); IPR037198 (SUPERFAMILY); IPR020568 (SUPERFAMILY)	F:GO:0005524; P:GO:0006298; P:GO:0007131; F:GO:0016887; F:GO:0030983; C:GO:0032300	F:ATP binding; P:mismatch repair; P:reciprocal meiotic recombination; F:ATPase activity; F:mismatched DNA binding; C:mismatch repair complex
[INTERPRO, NO-BLAST]	GFTW01181630.1	---NA---	1032									no IPS match	no IPS match	no IPS match
[INTERPRO, BLASTED]	GFTW01182094.1	AT3G03790.3	1637	3	2.03986e-05	73.33						no IPS match	no IPS match	no IPS match
[INTERPRO, NO-BLAST]	GFTW01183437.1	---NA---	418									no IPS match	no IPS match	no IPS match
[INTERPRO, NO-BLAST]	GFTW01183559.1	---NA---	758									no IPS match	no IPS match	no IPS match
[INTERPRO, BLASTED]	GFTW01183933.1	AT1G73350.2	964	7	2.41998e-48	93.3						mobidb-lite (MOBIDB_LITE); mobidb-lite (MOBIDB_LITE); mobidb-lite (MOBIDB_LITE); PTHR37202 (PANTHER)	no GO terms	no GO terms
[INTERPRO, BLASTED, GO-SLIM]	GFTW01184056.1	AT1G54610.1	873	20	1.30726e-79	85.03	3	P:GO:0006464; F:GO:0016301; F:GO:0043167	P:cellular protein modification process; F:kinase activity; F:ion binding			IPR000719 (PFAM); G3DSA:3.30.200.20 (GENE3D); PTHR24056 (PANTHER); PTHR24056:SF176 (PANTHER); IPR000719 (PROSITE_PROFILES); IPR011009 (SUPERFAMILY)	F:GO:0004672; F:GO:0005524; P:GO:0006468	F:protein kinase activity; F:ATP binding; P:protein phosphorylation
[INTERPRO, BLASTED, GO-SLIM]	GFTW01184374.1	AT3G14460.1	1809	20	1.20261e-78	46.63	1	F:GO:0043167	F:ion binding			PR00364 (PRINTS); IPR032675 (G3DSA:3.80.10.GENE3D); IPR002182 (PFAM); G3DSA:1.10.8.430 (GENE3D); IPR032675 (G3DSA:3.80.10.GENE3D); PTHR23155:SF1053 (PANTHER); PTHR23155 (PANTHER); SSF52058 (SUPERFAMILY); IPR027417 (SUPERFAMILY)	F:GO:0043531	F:ADP binding; P: defense response
[INTERPRO, BLASTED, GO-SLIM]	GFTW01186076.1	AT4G03230.8	2956	20	0	55.51	5	P:GO:0000003; P:GO:0006464; P:GO:0006520; F:GO:0016301; F:GO:0043167	P:reproduction; P:cellular protein modification process; P:cellular amino acid metabolic process; F:kinase activity; F:ion binding	EC:2.7.11	Transferring phosphorus-containing groups	IPR001480 (SMART); IPR000719 (SMART); IPR001480 (PFAM); IPR024171 (PIRSF); IPR036426 (G3DSA:2.90.10.GENE3D); G3DSA:3.30.200.20 (GENE3D); IPR000858 (PFAM); IPR001245 (PFAM); G3DSA:1.10.510.10 (GENE3D); IPR003609 (PFAM); PTHR27006:SF207 (PANTHER); PTHR27006 (PANTHER); IPR003609 (PROSITE_PROFILES); IPR000719 (PROSITE_PROFILES); IPR001480 (PROSITE_PROFILES); IPR001480 (CDD); cd14066 (CDD); cd01098 (C…	F:GO:0004672; F:GO:0004674; F:GO:0005524; P:GO:0006468; P:GO:0048544	F:protein kinase activity; F:protein serine/threonine kinase activity; F:ATP binding; P:protein phosphorylation; P:recognition of pollen
