# Supplementary material for: Transcriptomic and evolutionary analysis of the mechanisms by which P. argentatum, a rubber producing perennial, responds to drought
Source: BMC Plant Biol. 2019 Nov 13;19:494. doi: 10.1186/s12870-019-2106-2 (PMC6854645; doi:10.1186/s12870-019-2106-2)
Supplement: Supplementary file 8 — Additional file 8: Table S4. List of putative guayule lncRNAs organized by conservation within the Asteraceae and presence of miRNA binding motifs. [file 12870_2019_2106_MOESM8_ESM.xlsx]

## Sheet: Upregulated_putative_lncRNAs
Supplemental Table 4. Putative stress-responsive lncRNAs identifed from this analysis. Presence in H. annuus or L. sativa genome is based on sequence similarity (see Materials and Methods). miRNA binding sites are predicted using psRNA prediction software (see Materials and Methods). LncRNA annotations of homologous loci in H. annuus or L. sativa is based on published annotations in those systems.
Upregulated putative lncRNAs	Present in H. annuus	Present in L. sativa	miRNA binding site	Notes
GFTW01038850.1	Y		miR169 and miR5750
GFTW01077868.1	Y	Y
GFTW01084905.1	Y
GFTW01094294.1	Y			Annotated as lncRNA in H. annuus
GFTW01154975.1	Y		miR6113
GFTW01168370.1	Y	Y	mir166	Annotated as lncRNAs in both H. annuus and L. sativa
GFTW01179512.1	Y			Annotated as lncRNA in H. annuus
GFTW01181630.1	Y
GFTW01010116.1
GFTW01020097.1
GFTW01025050.1
GFTW01028010.1
GFTW01034390.1
GFTW01044029.1
GFTW01048398.1
GFTW01053140.1
GFTW01057287.1
GFTW01059029.1
GFTW01077376.1
GFTW01077815.1
GFTW01086702.1
GFTW01091405.1
GFTW01094745.1
GFTW01094749.1
GFTW01108156.1
GFTW01109770.1
GFTW01115990.1
GFTW01121945.1
GFTW01127290.1
GFTW01131463.1
GFTW01139276.1
GFTW01166736.1
GFTW01168072.1
GFTW01171131.1
GFTW01178772.1
GFTW01178826.1
GFTW01179516.1
GFTW01180697.1
GFTW01183437.1

## Sheet: Downregulated_putative_lncRNAs
Downregulated putative lncRNAs	Present in H. annuus	Present in L. sativa	miRNA binding site	Notes
GFTW01039094.1	Y
GFTW01116336.1	Y		miR1128
GFTW01142181.1	Y		miR3520
GFTW01159028.1	Y
GFTW01169180.1	Y		miR7528	lncRNA in H. annuus
GFTW01180405.1	Y	Y
GFTW01009072.1
GFTW01012040.1
GFTW01020712.1
GFTW01036159.1
GFTW01043716.1
GFTW01047808.1
GFTW01054607.1
GFTW01060054.1
GFTW01072057.1
GFTW01076910.1
GFTW01083564.1
GFTW01083798.1
GFTW01089568.1
GFTW01089570.1
GFTW01100128.1
GFTW01104441.1
GFTW01108836.1
GFTW01114253.1
GFTW01131296.1
GFTW01145969.1
GFTW01146408.1
GFTW01149405.1
GFTW01166942.1
GFTW01177597.1
GFTW01179940.1
